# Supplementary material for: Effect of intrathecal morphine and epidural analgesia on postoperative recovery after abdominal surgery for gynecologic malignancy: an open-label randomised trial
Source: PubMed Central journal article supplement — BMJ Open. 2019 Mar 4;9(3):e024484. doi: 10.1136/bmjopen-2018-024484 (PMC6430030; doi:10.1136/bmjopen-2018-024484), 2019-03-04
Supplement: bmjopen-2018-024484.draft_revisions.pdf [file bmjopen-2018-024484.draft_revisions.pdf]

# BMJ Open

BMJ Open is committed to open peer review. As part of this commitment we make the peer review history of every article we publish publicly available.

When an article is published we post the peer reviewers' comments and the authors' responses online. We also post the versions of the paper that were used during peer review. These are the versions that the peer review comments apply to.

The versions of the paper that follow are the versions that were submitted during the peer review process. They are not the versions of record or the final published versions. They should not be cited or distributed as the published version of this manuscript.

BMJ Open is an open access journal and the full, final, typeset and author-corrected version of record of the manuscript is available on our site with no access controls, subscription charges or pay-per-view fees (<http://bmjopen.bmj.com>).

If you have any questions on BMJ Open's open peer review process please email [info.bmjopen@bmj.com](mailto:info.bmjopen@bmj.com)

# BMJ Open

## Quality improvement of the postoperative recovery after abdominal surgery for gynecologic malignancy using intrathecal morphine. An open-label randomized trial.

|                               |                                                                                                                                                                                                                                                                                                                                                                                                                        |
|-------------------------------|------------------------------------------------------------------------------------------------------------------------------------------------------------------------------------------------------------------------------------------------------------------------------------------------------------------------------------------------------------------------------------------------------------------------|
| Journal:                      | <i>BMJ Open</i>                                                                                                                                                                                                                                                                                                                                                                                                        |
| Manuscript ID                 | bmjopen-2018-024484                                                                                                                                                                                                                                                                                                                                                                                                    |
| Article Type:                 | Research                                                                                                                                                                                                                                                                                                                                                                                                               |
| Date Submitted by the Author: | 28-May-2018                                                                                                                                                                                                                                                                                                                                                                                                            |
| Complete List of Authors:     | Kjølhede, Preben; Department of obstetrics and Gynecology, Department of experimental and clinical medicine<br>Bergdahl, Olga; Vrinnevisjukhuset i Norrköping, Department of Obstetrics and Gynecology<br>Borendal Wodlin, Ninnie; Linköpings Universitet Institutionen för klinisk och experimentell medicin, Dept. of Obstetrics and Gynecology<br>Nilsson, Lena; Region Östergötland, Anesthesia and Intensive care |
| Keywords:                     | Gynaecological oncology < GYNAECOLOGY, Quality in health care < HEALTH SERVICES ADMINISTRATION & MANAGEMENT, Adult surgery < SURGERY, Anaesthesia in oncology < ANAESTHETICS                                                                                                                                                                                                                                           |
|                               |                                                                                                                                                                                                                                                                                                                                                                                                                        |

SCHOLARONE™  
Manuscripts

1  
2 *A Research Article entitled*

3  
4  
5  
6 ***Quality improvement of the postoperative recovery after***  
7  
8 ***abdominal surgery for gynecologic malignancy using intrathecal***  
9  
10 ***morphine. An open-label randomized trial.***  
11  
12  
13  
14  
15

16 Authors:

17  
18 Preben Kjølhed<sup>1</sup>, MD, PhD, Olga Bergdahl<sup>2</sup>, MD, Ninnie Borendal Wodlin<sup>1</sup>, MD,  
19  
20 PhD and Lena Nilsson<sup>3</sup>, MD, PhD.  
21  
22

23 Affiliations:

24  
25 <sup>1</sup> Department of Obstetrics and Gynecology, and Department of Clinical and Experimental  
26  
27 Medicine, Linköping University, Linköping, Sweden

28  
29 <sup>2</sup> Department of Obstetrics and Gynecology, and Department of Clinical and Experimental  
30  
31 Medicine, Linköping University, Norrköping, Sweden

32  
33 <sup>3</sup> Department of Anesthesiology and Intensive Care, and Department of Medical and Health  
34  
35 Sciences, Linköping University, Linköping, Sweden.  
36

37 Corresponding author:

38 Preben Kjølhed, MD, PhD  
39 Department of Obstetrics and Gynecology  
40 University Hospital  
41 S-581 85 Linköping  
42 Sweden  
43 Phone: +46 101033187  
44 E-mail: [Preben.Kjolhed@liu.se](mailto:Preben.Kjolhed@liu.se)  
45  
46  
47  
48

49 Word count: 3141  
50  
51  
52  
53  
54  
55  
56  
57  
58  
59  
60

## Abstract

**Objectives:** We aimed to determine whether regional analgesia with intrathecal morphine (ITM) in an enhanced recovery program (ERAS) gives a shorter hospital stay with equal health-related QoL to epidural analgesia (EDA) in women after midline laparotomy for proven or assumed gynecological malignancies.

**Design:** An open-label, randomized, single center study.

**Setting:** A tertiary referral Swedish university hospital.

**Participants:** Eighty women, 18-70 years of age, ASA I and II, admitted consecutively to the department of Obstetrics and Gynecology.

**Interventions:** The women were allocated (1:1) to either the standard analgesic method at the clinic (EDA) or the experimental treatment (ITM). An ERAS protocol with standardized perioperative routines and standardized general anesthesia were applied. The EDA or ITM started immediately preoperatively. The ITM group received morphine, clonidine and bupivacaine intrathecally; the EDA group had an epidural infusion of bupivacaine, adrenalin and fentanyl.

**Primary and secondary outcome measures:** Primary endpoints were length of hospital stay (LOS) and proportion of women discharged on postoperative day 3. Secondary endpoints were time to meet standardized discharge criteria, QoL, pain assessments and consumption of analgesics.

**Results:** Significantly more women allocated to ITM were discharged on day 3, 62.5% vs. 30% (adjusted OR 7.25, 95%CI 2.26 to 23.28;  $p<0.001$ ). The LOS did not differ between the groups (median 3.3 vs. 4.3 days, adjusted  $p=0.09$ ) but time to standardized discharge criteria was significantly shorter for the ITM group (3.0 vs. 4.0 days, adjusted  $p<0.0001$ ). The ITM group used significantly less opioids. No differences were observed in pain assessment or QoL. No serious adverse events were attributed to ITM or EDA.

**Conclusions:** Compared with EDA, ITM is simpler to administer and manage, facilitates a short hospital stay and reduces opioid consumption postoperatively with an equally good QoL. ITM is effective as postoperative analgesia in gynecological cancer surgery.

**Trial registration number:** Clinical Trials NCT02026687

**Keywords:** Regional analgesia; Gynecological malignancy; Laparotomy; Opioid consumption; Quality improvement

**ARTICLE SUMMARY****STRENGTHS AND LIMITATIONS OF THIS STUDY**

- This study evaluates quality improvement on postoperative recovery after gynecological cancer surgery in an enhanced recovery after surgery setting.
- The study is an open randomized controlled trial.
- The experimental treatment (intrathecal morphine) was compared with the standard care of postoperative analgesia (epidural analgesic) used in our setting.
- The objective was to compare the two analgesic methods in a clinical context, not to find the appropriate doses or types of analgesic agent for each method.

**FUNDING STATEMENT**

The study was supported financially by grants from the Swedish Society of Medicine (SLS-404711), the Medical Research Council of South-east Sweden (FORSS-8685), Linköping University and the Region Östergötland (LIO-356191, LIO-441781).

**COMPETING INTERESTS**

The authors declare that they have no competing interests.

**DATA SHARING STATEMENT**

No additional data are available.

## INTRODUCTION

Pain is an important component in the assessment of health-related quality of life (QoL). Besides the human suffering, insufficiently treated postoperative pain complicates mobilization, increases the risk for complications and might prolong hospitalization.

Regional analgesia with epidural analgesia (EDA) in abdominal surgery is recommended in most enhanced recovery after surgery (ERAS) protocols for use both during surgery and postoperatively.[1,2] Single-dose intrathecal morphine provide good analgesia during the first postoperative days after abdominal cancer surgery,[3-6] and improves the recovery after hysterectomy for benign conditions.[7,8] An additional analgesic effect can be obtained by adding the  $\alpha$ -adrenergic agonist clonidine intrathecally.[4,9] In surgery for malignant gynecological diseases intrathecal morphine has been less described, although Kara et al. [10] in 2012 reported reduced morphine consumption and no increase in side effects. A few randomized studies have compared single-dose intrathecal morphine with continuous EDA after major abdominal surgery, showing disputed results concerning pain relief and hospital stay.[11-13]

Based on the potential benefits of intrathecal morphine as an effective and technically simple applied postoperative analgesic we designed this randomized study to compare the effects of a single-dose intrathecal combined morphine and clonidine (ITM) with the standard of care in the hospital using EDA in an ERAS program for abdominal surgery for proven or assumed gynecological malignant tumors.

The aim of the study was to determine whether ITM when compared with EDA in an ERAS program, shorten hospital stay with a similar patient experienced QoL. The primary endpoints were the proportion of women discharged from the hospital on the third day postoperatively and the *de facto* duration of hospital stay (LOS). Secondary outcome measurers were the time to meet standardized discharge criteria, QoL, pain assessment and analgesic consumption.

## MATERIAL AND METHODS

We conducted an open-label, randomized, controlled, single center study in accordance with Good Clinical Practice guidelines.[14,9 From March 2014 to January 2016 all women who were admitted to the department of Obstetrics and Gynecology, University Hospital, Linköping, Sweden due to a proven or assumed gynecological abdominal malignancy were eligible for the study. Women 18 to 70 years, World Health Organization (WHO) performance status < 2, American Society of Anesthesiologists (ASA) score < 3 and speaking Swedish fluently were included. Exclusion criteria were contraindications against regional analgesia, physical or psychiatric disability and surgery where pain could not be expected to be controlled by the regional analgesia. Oral and written informed consent was obtained from all participants.

At the preoperative visit the women were allocated to ITM and EDA, 1:1, from a computer-generated randomization code,[15] using sealed opaque envelopes. The participant was informed about the allocation.

Surgery was conducted through a midline laparotomy with the preoperative intention to obtain macroscopically radical tumor resection. If this was not possible the tumor burden was either to be reduced to the minimal residual tumor (less than 1 cm in size) or samples were to be obtained, preferably by salpingo-oophorectomy, in order to establish the histopathological diagnosis. Board-certified gynecological oncologists performed the surgery. The surgical technique used was at the discretion of the surgeon.

All women received thrombosis prophylaxis (tinzaparin 4500 anti-Xa IE subcutaneously) once daily for 28 days beginning the evening before the surgery, and prophylactic antibiotics (1.5 gram cefuroxime and 1.0 gram metronidazole intravenously (iv.) as a single dose) before surgery start.

All women received a standardized premedication with paracetamol 1995 mg. The allocated intervention of regional analgesic was applied prior to commencing the general anesthesia. The experimental treatment group (the ITM) had an intrathecal combination of a single dose isobar bupivacaine 15 mg, morphine 0.2 mg and clonidine 75µg, preferably through a 25G spinal needle. The EDA group had the standard EDA regime used in the hospital. The EDA was performed by a low thoracic puncture. The epidural infusion was started after induction of the general anesthesia but before surgery by a bolus dose of fentanyl 50-100 µg and a bolus from a mixture of bupivacaine 2.4 mg/ml, adrenalin 2.4 µg/ml and fentanyl 1.8 µg/ml. The same mixture was used as a continuous infusion, typically 4-8 ml/h, throughout surgery.

General anesthesia was standardized in both groups: induction with fentanyl and propofol, intubation facilitated with rocuronium and maintenance with sevoflurane. Fentanyl and rocuronium was repeated if needed. All patients had a gastric tube and an indwelling urinary catheter. The

1 gastric tube was removed before waking the patient up. Local anesthetic (40 ml bupivacaine 2.5  
2 mg/ml) was injected prefascially and subcutaneously in the abdominal wall in the area of the skin  
3 incision.  
4  
5

6 After the initial monitoring at the postoperative care unit, the postoperative pain management  
7 including surveillance of possible opioid side effects and neurological complications took place at  
8 the gynecological ward and followed the routines outlined by the Swedish Society of  
9 Anesthesiology and Intensive Care.[16]  
10  
11

12 The women in the ITM group received oral paracetamol 1330 mg and diclofenac 50 mg, both  
13 three times daily started on the day of surgery. Oxycodone 10-20 mg twice daily was added on the  
14 first postoperative day.  
15  
16

17 For the EDA group, a continuous epidural infusion of a mixture of bupivacain 1 mg/ml +  
18 adrenalin 2 µg/ml + fentanyl 2 µg/ml including the possibility of additional patient-controlled bolus  
19 doses was started postoperatively at the postoperative care unit and continued until the morning of  
20 the third postoperative day. The infusion rate, normally 4-8 ml/h, and bolus doses, normally 2 ml,  
21 were decided on by the responsible physician. The patients also had oral paracetamol 1330 mg three  
22 times daily, starting on the day of surgery. Oral oxycodone 10-20 mg twice daily and diclofenac 50  
23 mg three times daily were added in the morning of the third postoperative day before removal of the  
24 epidural catheter according to the guidelines.[16]  
25  
26  
27  
28  
29  
30

31 Rescue iv. morphine, 0.5-1 mg, iv. or oxycodone 5 mg orally was given if needed to women  
32 in both groups. In case of obvious pain relieving failure with the ITM or EDA iv. patient-controlled  
33 analgesia with morphine was started.  
34  
35

36 To quantify the amount of non-opioid analgesics given the defined daily dose (DDD)  
37 methodology was used.[17] All opioids, independent of administration route and including the ITM  
38 and the EDA, were converted to an equivalent iv. morphine dose.[18,19]  
39  
40

41 A numerical rating scale (NRS) 0-10 was used to assess the pain three times daily (8 am, 4  
42 pm, 10 pm) at rest and at mobilization, i.e. when moving out of bed, raising both legs when in bed  
43 or when giving a strong cough.  
44

45 The standardized criteria for discharge were: the patient was mobilized, tolerated a normal  
46 diet, had sufficient pain relief with oral analgesics (NRS ≤ 4), showed no signs of mechanical bowel  
47 obstruction and had voided spontaneously with less than 150 ml residual urine. If the last criterion  
48 was not met, the woman went home with the catheter, which was removed polyclinically. The  
49 discharge criteria were checked twice daily. The decision on discharge was made according to the  
50 medical criteria but could be prolonged by social or other practical, personal conditions. Both the *de*  
51 *facto* hospital stay (LOS) and the length of the stay until the discharge criteria were met were  
52 calculated.  
53  
54  
55  
56  
57  
58  
59  
60



1 The research nurse had telephone contact with the participants the day after discharge and  
2 then once a week until six weeks postoperatively. Complications were registered and graded  
3 according to the Clavien-Dindo classification.[20] The study was completed after the six-week  
4 contact.  
5  
6  
7

8 The QoL was assessed by two commonly used validated generic QoL forms. The EQ-5D form  
9 was completed preoperatively, daily during the first week after surgery, then once weekly until the  
10 six-week postoperative visit. [21] The Short Form – 36 Health Survey (SF-36) form was completed  
11 preoperatively and six weeks postoperatively.[22]  
12  
13

#### 14 **Patient involvement**

15 Patients were not involved in the study design or conduct of the study. By assessing QoL as part of  
16 the protocol, the patients reported a surrogate measure of the burden of the intervention.  
17  
18

#### 19 **Ethical approval**

20 The study was approved by the Regional Ethics Board of Linköping University (D.nr. 2013/185-31,  
21 approval date 29 August 2013), the Swedish Medical Products Agency (Eu-nr. 2013-001873-25;  
22 D.nr. 5.1-2013-50334, approval date 1 August 2013) and monitored by an independent monitor.  
23  
24  
25

#### 26 **Statistics**

27 Power analysis was based on the primary outcome endpoints. Providing that the minimum clinical  
28 relevant difference in hospital stay between the groups was 0.5 days and the proportion of women  
29 discharged on the third postoperative day was 80% (ITM group) and 50% (EDA group), each group  
30 should consist of 40 women including a 10% dropout rate in order to show statistical significance at  
31 a 5% level with an 80% power.  
32  
33  
34

35 Data are presented as median (range) or number (percent).  $\chi^2$  tests and Fisher's exact tests  
36 were used to analyze categorical data and Mann-Whitney U-tests for continuous data. Differences  
37 in continuous outcome measures between the two groups were analyzed by means of analysis of  
38 covariance (ANCOVA) and nominal effect measures by logistic regression. Adjustments were done  
39 simultaneously for age, body mass index (BMI), smoking habits, occurrence of complications  
40 during the hospital stay and final diagnosis malignant vs benign condition in the multivariate  
41 models. The results of the logistic regression models are given as odds ratios (ORs) or adjusted ORs  
42 (aORs) and 95% confidence intervals (CI).  
43  
44  
45  
46  
47  
48

49 A repeated measures analysis of variance (ANOVA) was used to analyze data measured on  
50 more occasions. Adjustments were made for the dichotomized final diagnosis of a malignant or  
51 benign disease. Fisher's protected least significant difference (PLSD) post hoc tests were used to  
52 analyze the pairwise associations between groups on each single occasion of measurement.  
53  
54  
55  
56  
57  
58  
59

1                   The significance level was set at  $p < 0.05$ . The statistical tests were two-tailed. All analyses  
2  
3 were carried out according to intention-to-treat principles using Statistica v13.2 (Dell Software, 5  
4 Polaris Way, Aliso Viejo, CA 92656, USA).  
5  
6  
7  
8  
9  
10  
11  
12  
13  
14  
15  
16  
17  
18  
19  
20  
21  
22  
23  
24  
25  
26  
27  
28  
29  
30  
31  
32  
33  
34  
35  
36  
37  
38  
39  
40  
41  
42  
43  
44  
45  
46  
47  
48  
49  
50  
51  
52  
53  
54  
55  
56  
57  
58  
59  
60

## RESULTS

The description of the selection and the randomization of the study population is presented in Figure 1. Forty women were chosen to receive EDA and 40 to receive ITM. One woman in each group did not receive any regional analgesia and one woman had ITM instead of EDA based on a mistake by the attending anesthesiologist.

The descriptive and demographic data are shown in Table 1. The clinical surgical and anesthesiological data are presented in Table 2.

In 20% the final diagnosis postoperatively was benign, most often showing a benign ovarian tumor or a large uterine fibroid. The benign diseases were evenly distributed between the two groups.

Significantly more women in the ITM group were discharged from the hospital on the third day (25 women (62.5%) in the ITM group vs. 12 (30%) in the EDA group, (OR 3.89, 95%CI; 1.53 to 9.87);  $p=0.004$ ). When adjusting for age, BMI, smoking habits, complications during the hospital stay and malignant vs. benign condition, this association was even stronger (aOR 7.25, 95%CI; 2.26 to 23.28;  $p<0.001$ ). The LOS was statistically significantly shorter for the ITM group compared with the EDA group (median (range) 3.3 (1.5-56.3) vs. 4.3 (2.2-43.2) days;  $p=0.01$ ). However, when adjusted for the confounders the statistical significance disappeared ( $p=0.09$ ). The time to meet standardized discharge criteria was significantly shorter in the ITM group compared with the EDA group (median (range) 3.0 (1.5-56.0) vs. 4.0 (1.5-7.5) days;  $p<0.001$ ). This significant difference remained when adjusted for the confounders used previously ( $p<0.0001$ ). Complications during the hospital stay was a strong independent risk factor for prolonged hospital stay (OR 9.53, 95%CI; 1.69 to 53.7).

The EDA group had a significantly higher total consumption of opioids than the ITM group whereas the use of non-opioids was similar in the two groups (Figure 2). Simultaneously, there was no significant difference in the overall assessment of pain (NRS) between the groups (Figure 3). The two groups showed different patterns in the NRS ratings as indicated by the significant interaction effects. The post hoc tests showed that the NRS ratings were significantly higher in the ITM group during the first two days at mobilization and on a few occasions at rest, whereas the EDA group scored significantly higher both at rest and at mobilization on day three when the EDA catheter was removed.

The QoL parameters as measured by the EQ-5D, day-by-day, presented no statistically significant difference in health index between the two groups (Figure 4). Neither did the SF-36 show any statistically significant difference in any of the subscales or summary scores between the groups (Table 3). The role physical and the physical component summary score had not recovered to baseline level in either of the two groups after six weeks whereas the mental health and the

1 mental component summary score showed a significant improvement after six weeks compared  
2 with the preoperative assessment.  
3

4  
5 The EDA failed in four women (10%) and ITM analgesia in one (2.5%). These women had  
6 either a new EDA in the post-anesthesia care or received patient-controlled morphine iv. One  
7 accidental dural puncture occurred in the EDA group. No post-dural puncture headache or serious  
8 adverse anesthesiological side effects were observed in either of the groups. The perioperative  
9 complications graded according to the Clavien-Dindo classification in the two groups did not differ  
10 significantly as shown in Table 4.  
11  
12  
13  
14  
15  
16  
17  
18  
19  
20  
21  
22  
23  
24  
25  
26  
27  
28  
29  
30  
31  
32  
33  
34  
35  
36  
37  
38  
39  
40  
41  
42  
43  
44  
45  
46  
47  
48  
49  
50  
51  
52  
53  
54  
55  
56  
57  
58  
59  
60

## DISCUSSION

The study showed that a single-dose of intrathecal morphine used as postoperative analgesia compared with epidural analgesia gives advantages in abdominal gynecological cancer surgery in regard to the time to meet the standardized discharge criteria and lower consumption of opioids postoperatively. A substantially higher proportion of women with ITM was discharged on the third postoperative day with an evenly reported health-related QoL and assessment of pain as women with EDA. A key point of an ERAS protocol is simplicity and a single intrathecal injection is simpler than a continuous epidural requiring ongoing management and monitoring. We regard ITM as a quality improvement from the perspective of both the patients and the health care.

The strengths of this trial are the randomized design, the unanimous ERAS and postoperative surveillance of the patients in the gynecological ward, the assessment of pain at rest and during mobilization, and the active use of rescue analgesics on demand. For obvious reasons the interventions could not be blinded for the participants or the staff. A limitation for generalization of the results is the single center design. The ERAS concept is well established in daily clinical work and therefore the results can only be generalized to facilities with similar clinical standards and only to units that manage patients with regional analgesia. The two methods of regional analgesia may not be comparable in giving potentially equivalent analgesia with the dosage and preparation used. However, our objective was to compare the two analgesic methods in a clinical context, not to find the appropriate doses or types of analgesic agent for each method. Therefore, we selected conventional doses of the medications.

The use of intrathecal opioids requires close monitoring of sedation and respiratory rate for 12 hours. The nurses on the gynecological ward were educated regarding complications after ITM with special regard to late respiratory depression and the surveillance followed strict national recommendations. Intrathecal morphine is used in approximately two-thirds of Swedish gynecological units in connection with abdominal hysterectomy having a continued observation on the regular gynecological ward after an initial period of 2-6 hours in a postoperative care unit.[23] The intrathecal morphine dose 0.2 mg was chosen with the purpose of giving adequate analgesia at a risk of respiratory depression that equals systemic opioid analgesia.[24] Following abdominal hysterectomy there is no benefit from increasing the morphine dose over 0.2 mg.[25]

The *de facto* duration of hospital stay was shorter in the ITM group. A similar short length of stay has recently been reported from other ERAS programs for gynecological cancer.[26-28] Wijk et al.[28] used an analgesic regimen based on oral paracetamol and diclofenac and over 90% of the patients did not need systemic opioids from the day after surgery. Like our study, they used standardized discharge criteria. It is important to analyze when discharge criteria are fulfilled, as

1 they are robust and generalizable. The length of hospital stay is often influenced by context-specific  
2 social factors.  
3

4  
5 Multimodal analgesic regime minimizing opioid use has been shown to enhance  
6 recovery.[2,29] Despite the higher rating of NRS at mobilization during the first few days in the  
7 ITM group the consumption of opioids was nearly three times lower in the same time period  
8 compared with the EDA group, and the QoL index did not differ between the groups. This may  
9 imply that the women in the ITM group were as satisfied as the EDA group with their pain  
10 management, and the difference in NRS rating at mobilization was less clinically significant. The  
11 study included only ASA class I-II patients. For patients with more severe cardio-pulmonary  
12 comorbidity the EDA regimen may offer a better early analgesia that could be favorable. A study on  
13 abdominal hysterectomy for endometrial cancer showed that women without EDA ceased opioid  
14 analgesia earlier than those women who had an EDA,[30] indicating a possible overuse of opioids  
15 in EDA. An earlier removal of the EDA catheter, for example after 48 hours, is a possible  
16 development of the EDA regimen. Prior to this trial, the standard praxis in our department was  
17 removal of the EDA catheter on the third day. Consequently, we studied the ITM against this  
18 regime. The difference in DDD of non-opioids seen until the third postoperative day was due to the  
19 protocol demand and the clinical routine in the hospital that diclofenac was not allowed in the EDA  
20 group until the EDA catheter was removed. The uneven use of diclofenac in the groups during the  
21 first three postoperative days may be seen as a weakness of the study. However, the DDD of non-  
22 opioids raised from day 1 to day 3 in the EDA group by using diclofenac in some patients against  
23 the study protocol and the clinical routines in the department. It is therefore less likely that the  
24 difference in DDD of non-opioids can explain the significant difference in opioids. In spite of the  
25 addition of diclofenac and consequently an increased DDD on the third postoperative day, the  
26 women in the EDA group rated the NRS at rest and at mobilization higher than the ITM women.  
27  
28  
29  
30  
31  
32  
33  
34  
35  
36  
37  
38  
39

40 In order to increase the patient-oriented focus on recovery we used two generic QoL forms to  
41 assess the patient's experience of the health status. The EQ-5D was used to determine the short-  
42 term recovery day-by-day, whereas the SF-36 was used for a longer-term assessment. We found no  
43 significant differences in QoL between the groups, indicating that ITM and EDA were equally  
44 effective in obtaining patient satisfaction.  
45  
46  
47

48 Severe complications after EDA and ITM are rare but still the indication for the regional  
49 analgesia should always be considered individually. In this trial no severe complications attributed  
50 to the regional analgesia occurred and the surgical complications seemed to be equally distributed  
51 between the groups. However, the trial was not powered to detect a statistical difference in  
52 complications.  
53  
54  
55  
56  
57  
58  
59

1  
2 In conclusion, ITM given in an ERAS program seems to be safe, simple to administer and  
3 effective as postoperative analgesia and gives quality advantages concerning the postoperative  
4 recovery in gynecological abdominal cancer surgery.  
5  
6  
7  
8  
9  
10  
11  
12  
13  
14  
15  
16  
17  
18  
19  
20  
21  
22  
23  
24  
25  
26  
27  
28  
29  
30  
31  
32  
33  
34  
35  
36  
37  
38  
39  
40  
41  
42  
43  
44  
45  
46  
47  
48  
49  
50  
51  
52  
53  
54  
55  
56  
57  
58  
59  
60

## ACKNOWLEDGEMENTS

The research nurses Åsa Rydmark Kersley, Linda Shosholli and Gunilla Gagnö are thanked for their invaluable dedicated work and support during the study.

For peer review only



**REFERENCES**

1. Nygren J, Thacker J, Carli F, et al. Guidelines for perioperative care in elective rectal/pelvic surgery: Enhanced Recovery After Surgery (ERAS®) Society recommendations. *Clin Nutr* 2012;31:801-16.
2. Feldheiser A, Aziz O, Baldini G, et al. Enhanced recovery after surgery (ERAS) for gastrointestinal surgery, part 2: consensus statement for anaesthesia practice. *Acta Anaesthesiol Scand* 2016;60:289–334.
3. Devys JM, Mora A, Plaud B, et al. Intrathecal + PCA morphine improves analgesia during the first 24 hr after major abdominal surgery compared to PCA alone. *Can J Anesth* 2003;50:355-61.
4. Andrieu G, Roth B, Ousmane L, et al. The efficacy of intrathecal morphine with or without clonidine for postoperative analgesia after radical prostatectomy. *Anesth Analg* 2009;108:1954-7.
5. Sakowska M, Docherty E, Linscott D, et al. A change in practice from epidural to intrathecal morphine analgesia for hepato-pancreato-biliary surgery. *World J Surg* 2009;33:1802-8.
6. Bujedo BM, Santos SG, Azpiazu AU. A review of epidural and intrathecal opioids used in the management of postoperative pain. *J Opioid Manag* 2012;8:177-92.
7. Borendal Wodlin N, Nilsson L, Kjølhed P. The impact of mode of anaesthesia on postoperative recovery from fast-track abdominal hysterectomy: a randomised clinical trial. *BJOG* 2011;118:299-308.
8. Kroon U-B, Rådström M, Hjelthe C, et al. Fast-track hysterectomy: A randomised, controlled study. *Eur J Obstet Gynecol Reprod Biol* 2010;151:203-7.
9. Engelman E, Marsala C. Efficacy of adding clonidine to intrathecal morphine in acute postoperative pain: meta-analysis. *Br J Anaesth* 2013;110:21-7.
10. Kara I, Apiliogullari S, Oc B, et al. The effects of intrathecal morphine on patient-controlled analgesia, morphine consumption, postoperative pain and satisfaction scores in patients undergoing gynaecological oncological surgery. *J Int Med Res* 2012;40:666-72.
11. De Pietri L, Siniscalchi A, Reggiani A, et al. The use of intrathecal morphine for postoperative pain relief after liver resection: a comparison with epidural analgesia. *Anesth Analg* 2006;102:1157-63.
12. Koea JB, Young Y, Gunn K. Fast track liver resection: the effect of a comprehensive care package and analgesia with single dose intrathecal morphine with gabapentin or continuous epidural analgesia. *HPB Surgery* 2009;2009:271986.

- 1  
2  
3  
4  
5  
6  
7  
8  
9  
10  
11  
12  
13  
14  
15  
16  
17  
18  
19  
20  
21  
22  
23  
24  
25  
26  
27  
28  
29  
30  
31  
32  
33  
34  
35  
36  
37  
38  
39  
40  
41  
42  
43  
44  
45  
46  
47  
48  
49  
50  
51  
52  
53  
54  
55  
56  
57  
58  
59  
60
13. Vercauteren M, Vereecken K, La Malfa M, et al. Cost-effectiveness of analgesia after Caesarean section. A comparison of intrathecal morphine and epidural PCA. *Acta Anaesthesiol Scand* 2002;46:85-9.
14. International Conference on Harmonisation of technical requirements for registration of pharmaceuticals for human use. Good Clinical Practice. Available online at: <http://ichgcp.net/>. (Accessed April 28; 2018).
15. Simple Interactive Statistical Analysis. Allocation. Available online at: <http://www.quantitativeskills.com/sisa/>. (Accessed April 28; 2018).
16. Svensk Förening för Anestesi och Intensivvård. Postoperative analgesia (In Swedish). Available online at: <https://sfai.se/riktlinje/medicinska-rad-och-riktlinjer/anestesi/postoperativ-smartlindring/>. (Accessed April 28; 2018).
17. WHO Collaborating Centre for Drug Statistics Methodology. ATC/DDD Index 2017. Available online at: [https://www.whocc.no/atc\\_ddd\\_index/](https://www.whocc.no/atc_ddd_index/). (Accessed April 28; 2018).
18. Loper K, Ready B, Downey M, et al. Epidural and intravenous fentanyl infusions are clinically equivalent after knee surgery. *Anest Analg* 1990;70:72-5.
19. Caraceni A, Hanks G, Kaasa S, et al. Use of opioid analgesics in the treatment of cancer pain: evidence-based recommendations from the EAPC. *Lancet Oncol* 2012;13:e58-68.
20. Clavien PA, Barkun J, de Oliveira ML. The Clavien-Dindo classification of surgical complications: five-year experience. *Ann Surg* 2009;250:187-96.
21. The EuroQol Group. EuroQol – a new facility for the measurement of health-related quality of life. *Health Policy* 1990;16:199-208.
22. Sullivan M, Karlsson J, Ware JE. The Swedish SF-36 Health Survey I. Evaluation of data quality, scaling assumptions, reliability and construct validity across general populations in Sweden. *Soc Sci Med* 1995;41:1349-58.
23. Hein A, Gillis-Haegerstrand C, Jakobsson J. Neuraxial opioids as analgesia in labour, caesarean section and hysterectomy: A questionnaire survey in Sweden. Version 2. *F1000Research* 2017;6:133.
24. Gehling M, Tryba M. Risks and side-effects of intrathecal morphine combined with spinal anaesthesia: a meta-analysis. *Anaesthesia* 2009;64:643-51.
25. Hein A, Rösblad P, Gillis-Haegerstrand C, et al. Low dose intrathecal morphine effects on post-hysterectomy pain: a randomized placebo-controlled study. *Acta Anesth Scand* 2012;56:102-9.
26. Wijk L, Franzén K, Ljungqvist O, et al. Enhanced Recovery after Surgery Protocol in Abdominal Hysterectomies for Malignant versus Benign Disease. *Gynecol Obstet Invest* 2016;81:461-7.

- 1  
2 27. Carter J. Fast-track surgery in gynaecology and gynaecologic oncology: a review of a rolling  
3 clinical audit. *ISRN Surg* 2012;2012:368014.
- 4  
5 28. Dickson EL, Stockwell E, Geller MA, et al. Enhanced recovery program and length of stay  
6 after laparotomy on a gynecologic oncology service: a randomized controlled trial. *Obstet*  
7 *Gynecol* 2017;129:355-62.
- 8  
9 29. Nelson G, Altman AD, Nick A, et al. Guidelines for postoperative care in  
10 gynecologic/oncology surgery: Enhanced Recovery After Surgery (ERAS®) Society  
11 recommendations — Part II. *Gynecol Oncol* 2016;140:323-32.
- 12  
13 30. Belavy D, Janda M, Baker J, et al. Epidural analgesia is associated with an increased  
14 incidence of postoperative complications in patients requiring an abdominal hysterectomy for  
15 early stage endometrial cancer. *Gynecol Oncol* 2013;131:423–9.
- 16  
17  
18  
19  
20  
21  
22  
23  
24  
25  
26  
27  
28  
29  
30  
31  
32  
33  
34  
35  
36  
37  
38  
39  
40  
41  
42  
43  
44  
45  
46  
47  
48  
49  
50  
51  
52  
53  
54  
55  
56  
57  
58  
59  
60

**FIGURE LEGENDS**

- 1  
2  
3  
4 Figure 1. CONSORT flow chart of participants in the study. EDA, epidural analgesia. ITM,  
5 intrathecal morphine analgesia.  
6  
7 Figure 2. Consumption of analgesics after surgery in relation to occasion of measurement.  
8 Plots represent means and bars represent 95% confidence interval. Results of the  
9 repeated measures ANOVA and post hoc tests from Day 0 to the Day 6 assessment  
10 for equivalent morphine given and from Day 0 to Day 42 for DDD non-opioids are  
11 presented in the table below the diagram. Adjusted for malignant/benign condition.  
12 DDD = defined daily dose; EDA = epidural analgesia; ITM = intrathecal morphine  
13 analgesia.  
14  
15  
16  
17  
18  
19 Figure 3. Assessment of pain by means of a 10 graded numeric rating scale (NRS) at rest and  
20 at mobilization. Plots represent means and bars represent 95% confidence interval.  
21 Results of the repeated measures ANOVA and post hoc tests from Day 0 to the Day  
22 6. Assessments done from the evening of surgery and three times daily. Day 1.1, 1.2  
23 and 1.3, respectively, represent the measurements performed in the morning, the  
24 afternoon and the evening on Day 1. Adjusted for malignant/benign condition. EDA  
25 = epidural analgesia; ITM = intrathecal morphine analgesia.  
26  
27  
28  
29  
30  
31 Figure 4. Illustration of EQ-5D weighted health state index in relation to occasion of  
32 measurement. Plots represent means and bars represent 95% confidence interval.  
33 Result of the repeated measures ANOVA and post hoc tests from Day 0 - 42  
34 assessment is presented. Adjusted for malignant/benign condition. EDA = epidural  
35 analgesia; ITM = intrathecal morphine analgesia.  
36  
37  
38  
39  
40  
41  
42  
43  
44  
45  
46  
47  
48  
49  
50  
51  
52  
53  
54  
55  
56  
57  
58  
59  
60

1  
2  
3  
4  
5  
6  
7  
8  
9  
10  
11  
12  
13  
14  
15  
16  
17  
18  
19  
20  
21  
22  
23  
24  
25  
26  
27  
28  
29  
30  
31  
32  
33  
34  
35  
36  
37  
38  
39  
40  
41  
42  
43  
44  
45  
46  
47  
48  
49  
50  
51  
52  
53  
54  
55  
56  
57  
58  
59  
60

For peer review only

**AUTHOR STATEMENT****AUTHOR'S CONTRIBUTION**

PK, NBW and LN designed and conducted the study. PK performed the statistically analyses. PK, OB, NBW and LN undertook the initial interpretation of the data, which was followed by discussions with all the authors. PK, OB and LN drafted the initial version of the manuscript, followed by a critical revision process for intellectual content involving all authors. All authors agreed to the final version of the manuscript before submission. All authors agree to be accountable for the accuracy of any part of the work.

Table 1. Descriptive and demographic data of the study population.

|                                       | EDA group<br>n = 40 | ITM group<br>n = 40 |
|---------------------------------------|---------------------|---------------------|
| Age (years)                           | 59.0 (30.0-70.0)    | 58.5 (35.0-68.0)    |
| < 50 years                            | 7 (17.5%)           | 6 (15%)             |
| 50 – 60 years                         | 16 (40%)            | 20 (50%)            |
| > 60 years                            | 17 (42.5%)          | 14 (35%)            |
| Body mass index (kg/m <sup>2</sup> )  | 28.5 (18.2-38.1)    | 27.8 (20.3-43.5)    |
| BMI < 25 kg/m <sup>2</sup>            | 11 (27.5%)          | 13 (32.5%)          |
| BMI 25-29.9 kg/m <sup>2</sup>         | 15 (37.5%)          | 15 (37.5%)          |
| BMI 30-34.9 kg/m <sup>2</sup>         | 9 (22.5%)           | 7 (17.5%)           |
| BMI ≥ 35 kg/m <sup>2</sup>            | 5 (12.5%)           | 5 (12.5%)           |
| Parity                                | 2.0 (0-5)           | 2.0 (0-4)           |
| Smokers                               | 5 (12.5%)           | 4 (10%)             |
| Previous laparotomy                   | 17 (42.5%)          | 17 (42.5%)          |
| ASA classification                    |                     |                     |
| Class I                               | 15 (37.5%)          | 15 (37.5%)          |
| Class II                              | 25 (62.5%)          | 25 (62.5%)          |
| Comorbidity                           |                     |                     |
| Diabetes mellitus                     | 4 (10%)             | 4 (10%)             |
| Cardiovascular disease                | 13 (32.5%)          | 12 (30%)            |
| Pulmonary disease                     | 4 (10%)             | 5 (12.5%)           |
| Mild psychiatric disease              | 6 (12.5%)           | 4 (10%)             |
| Previous malignancy                   | 4 (10%)             | 2 (5%)              |
| Current medication                    |                     |                     |
| Antidepressant/sedative               | 8 (20%)             | 7 (17.5%)           |
| Analgesics                            | 7 (17.5%)           | 12 (30%)            |
| Indication for surgery                |                     |                     |
| Proven/assumed gynecologic malignancy | 16/24 (40%/60%)     | 18/22 (45%/55%)     |

Figures denote median and range or number and percent.

ASA, American Society of Anesthesiologists risk classification; BMI, body mass index. EDA, epidural analgesia. ITM, intrathecal morphine analgesia

Table 2. Clinical surgical and anesthesiological data.

|                                                                   | EDA group<br>n = 40 | ITM group<br>n = 40 | p-value*          |
|-------------------------------------------------------------------|---------------------|---------------------|-------------------|
| Operation time (minutes)                                          | 116 (44-352)        | 139 (48-421)        | 0.10              |
| Estimated per-operative blood loss (ml)                           | 100 (20-800)        | 200 (20-2000)       | 0.28              |
| Extent of skin incision from superior edge of symphysis pubis to: |                     |                     |                   |
| - umbilicus                                                       | 6 (15%)             | 2 (5%)              |                   |
| - between umbilicus and PX                                        | 17 (42.5%)          | 21 (52.5%)          | 0.30              |
| - PX                                                              | 17 (42.5%)          | 17 (42.5%)          |                   |
| Extent of surgery (no. of women)                                  |                     |                     |                   |
| - Category I                                                      | 1 (2.5%)            | 1 (2.5%)            |                   |
| - Category II                                                     | 8 (20%)             | 2 (5%)              |                   |
| - Category III                                                    | 17 (42.5%)          | 18 (45%)            | 0.25              |
| - Category IV                                                     | 8 (20%)             | 14 (35%)            |                   |
| - Category V                                                      | 6 (15%)             | 5 (12.5%)           |                   |
| Tumor status at end of surgery <sup>‡</sup> (no. of women):       |                     |                     |                   |
| - Macroscopically radical                                         | 17 (63%)            | 25 (76%)            |                   |
| - Minimal disease                                                 | 3 (11%)             | 5 (15%)             | 0.22              |
| - Bulky disease                                                   | 7 (26%)             | 3 (9%)              |                   |
| Histopathological diagnosis                                       |                     |                     |                   |
| - Ovarian/fallopian tube/peritoneal cancer                        | 13 (32.5%)          | 18 (45%)            |                   |
| - Ovarian borderline cancer                                       | 5 (12.5%)           | 0 (0%)              |                   |
| - Uterus carcinoma or sarcoma                                     | 7 (17.5%)           | 13 (32.5%)          | 0.06              |
| - Cervical cancer                                                 | 1 (2.5%)            | 0 (0%)              |                   |
| - Appendix or sigmoideum cancer                                   | 1 (2.5%)            | 2 (5%)              |                   |
| - Benign ovarian or uterine tumor                                 | 13 (32.5%)          | 7 (17.5%)           |                   |
| CAD at discharge (no. of women)                                   | 3 (7.7%)            | 4 (10.3%)           | 0.45 <sup>†</sup> |
| Premedication                                                     |                     |                     |                   |
| Paracetamol (DDD)                                                 | 0.67 (0-0.67)       | 0.67 (0-0.67)       | 0.99              |
| Morphine <sup>§</sup> (mg)                                        | 0 (0-3.0)           | 0 (0-1.5)           | 0.30              |
| Antiemetic, medication (no. of women)                             | 16 (57%)            | 12 (43%)            | 0.35              |
| Antiemetic, Acupressure band (no. of women)                       | 22 (47%)            | 25 (53%)            | 0.50              |
| Anesthetic drugs:                                                 |                     |                     |                   |
| Propofol (mg)                                                     | 200 (120-2032)      | 200 (150-500)       | 0.62              |
| Rokuroniumbromid (mg)                                             | 50 (15-80)          | 50 (30-110)         | 0.32              |
| Equivalent morphine dose (mg)                                     | 30.5 (18.6-146.3)   | 45.0 (20.0-68.0)    | <0.0001           |
| Paracetamol (mg)                                                  | 0 (0-1000)          | 0 (0-1000)          | 0.99              |
| Vasoactive treatment during anesthesia                            |                     |                     |                   |
| Ephedrine (mg)                                                    | 20 (0-100)          | 20 (0-80)           | 0.79              |
| Phenylephrine (µg)                                                | 0 (0-4000)          | 0 (0-5200)          | 0.50              |
| Norepinephrine (µg)                                               | 0 (0-2000)          | 0 (0-2698)          | 0.57              |
| Atropine (mg)                                                     | 0 (0-0.5)           | 0 (0-0.5)           | 0.24              |
| Anesthesia time (minutes)                                         | 177.5 (110-465)     | 200 (98-475)        | 0.08              |
| Lowest body temperature during surgery (°C)                       | 35.7 (34.3-36.6)    | 35.6 (34.7-36.3)    | 0.16              |
| Body temperature at end of surgery (°C)                           | 36.1 (34.8-36.8)    | 36.1 (35.2-37.2)    | 0.68              |
| Time in PACU (hours)                                              | 4.6 (2.9-27.2)      | 5.6 (3.4-18.4)      | 0.09              |

Figures denote number and (percent) or median and (range).

CAD, transurethral or supra pubic indwelling catheter. DDD, defined daily dose. EDA, epidural analgesia. ITM, intrathecal morphine analgesia. PACU, post anesthesia care unit. PX, processus xiphoideus.



1 Categories of extent of surgery: Category I, diagnostic surgery; Category II, resection of  
2 gynecologic organs only; Category III, resection of gynecologic organs, omentectomy and ±  
3 appendectomy; Category IV, as Category III + pelvic and/or paraaortic lymphadenectomy;  
4 Category V, as Category III ± pelvic and/or paraaortic lymphadenectomy + resection of abdominal  
5 visceral organs.  
6

7  
8 \*Mann-Whitney U-test applied for continuous data and  $\chi^2$ - test (df 1-5) or †Fisher's exact test for  
9 categorical data. ‡ in women with malignant disease. § Equivalent dose morphine intravenously  
10  
11  
12  
13  
14  
15  
16  
17  
18  
19  
20  
21  
22  
23  
24  
25  
26  
27  
28  
29  
30  
31  
32  
33  
34  
35  
36  
37  
38  
39  
40  
41  
42  
43  
44  
45  
46  
47  
48  
49  
50  
51  
52  
53  
54  
55  
56  
57  
58  
59  
60

Table 3. SF-36 subscales and summary scores. A high score represents a better health-related quality of life

| SF-36 subscales                  | Time lapse  |             |             |             | Repeated measures ANOVA*               |                       |                    |
|----------------------------------|-------------|-------------|-------------|-------------|----------------------------------------|-----------------------|--------------------|
|                                  | Baseline    |             | Day 42      |             | Main effect between modes of analgesia | Main effect over time | Interaction effect |
| Physical functioning             | 76.6 (23.0) | 74.9 (21.5) | 76.4 (19.4) | 76.1 (20.9) | $p=0.90$                               | $p=0.96$              | $p=0.80$           |
| Role physical                    | 47.5 (45.6) | 53.1 (44.3) | 17.5 (35.0) | 7.5 (24.8)  | $p=0.94$                               | $p<0.001$             | $p=0.16$           |
| Bodily pain                      | 59.5 (30.0) | 65.1 (25.1) | 58.5 (23.2) | 65.5 (23.9) | $p=0.20$                               | $p=0.78$              | $p=0.74$           |
| General health                   | 69.0 (21.3) | 67.5 (16.8) | 64.2 (22.4) | 68.7 (16.9) | $p=0.50$                               | $p=0.71$              | $p=0.13$           |
| Vitality                         | 54.0 (21.7) | 54.4 (21.8) | 48.5 (20.5) | 54.6 (18.9) | $p=0.37$                               | $p=0.97$              | $p=0.12$           |
| Social functioning               | 70.0 (27.1) | 69.4 (25.8) | 65.6 (26.5) | 70.9 (19.7) | $p=0.37$                               | $p=0.88$              | $p=0.20$           |
| Role emotional                   | 62.5 (44.8) | 63.3 (45.2) | 58.3 (46.4) | 73.3 (42.8) | $p=0.14$                               | $p=0.15$              | $p=0.14$           |
| Mental health                    | 70.1 (19.4) | 65.7 (19.8) | 72.8 (19.8) | 75.6 (15.3) | $p=0.95$                               | $p=0.001$             | $p=0.05$           |
| Physical component summary score | 43.1 (12.0) | 44.3 (11.6) | 38.9 (8.1)  | 37.9 (7.4)  | $p=0.85$                               | $p<0.001$             | $p=0.29$           |
| Mental component summary score   | 42.9 (13.5) | 41.6 (13.2) | 43.1 (12.8) | 47.6 (10.2) | $p=0.29$                               | $p<0.01$              | $p=0.02$           |

Figures indicate mean (1 SD). EDA = epidural analgesia. ITM = intrathecal morphine analgesia.

\* Adjusted for malignant/benign condition.

No significant differences were observed in the subscales between the two groups at baseline (Mann-Whitney U-test).

Table 4. The Clavien-Dindo classification of surgical complications (contracted form) within the study period of six weeks.

|                  | EDA group<br>(n=40) | ITM group<br>(n=40) | p-value* |
|------------------|---------------------|---------------------|----------|
| No complications | 19 (47.5)           | 19 (47.5)           |          |
| Grade I          | 13 (32.5)           | 8 (20.0)            |          |
| Grade II         | 6 (15.0)            | 6 (15.0)            | 0.313    |
| Grade III        | 1 (2.5)             | 6 (15.0)            |          |
| Grade IV         | 1 (2.5)             | 1 (2.5)             |          |

Figures denote number and (percent).

EDA = epidural analgesia. ITM = intrathecal morphine analgesia. \*  $\chi^2$  for trends (df=4).

1  
2  
3  
4  
5  
6  
7  
8  
9  
10  
11  
12  
13  
14  
15  
16  
17  
18  
19  
20  
21  
22  
23  
24  
25  
26  
27  
28  
29  
30  
31  
32  
33  
34  
35  
36  
37  
38  
39  
40  
41  
42  
43  
44  
45  
46  
47

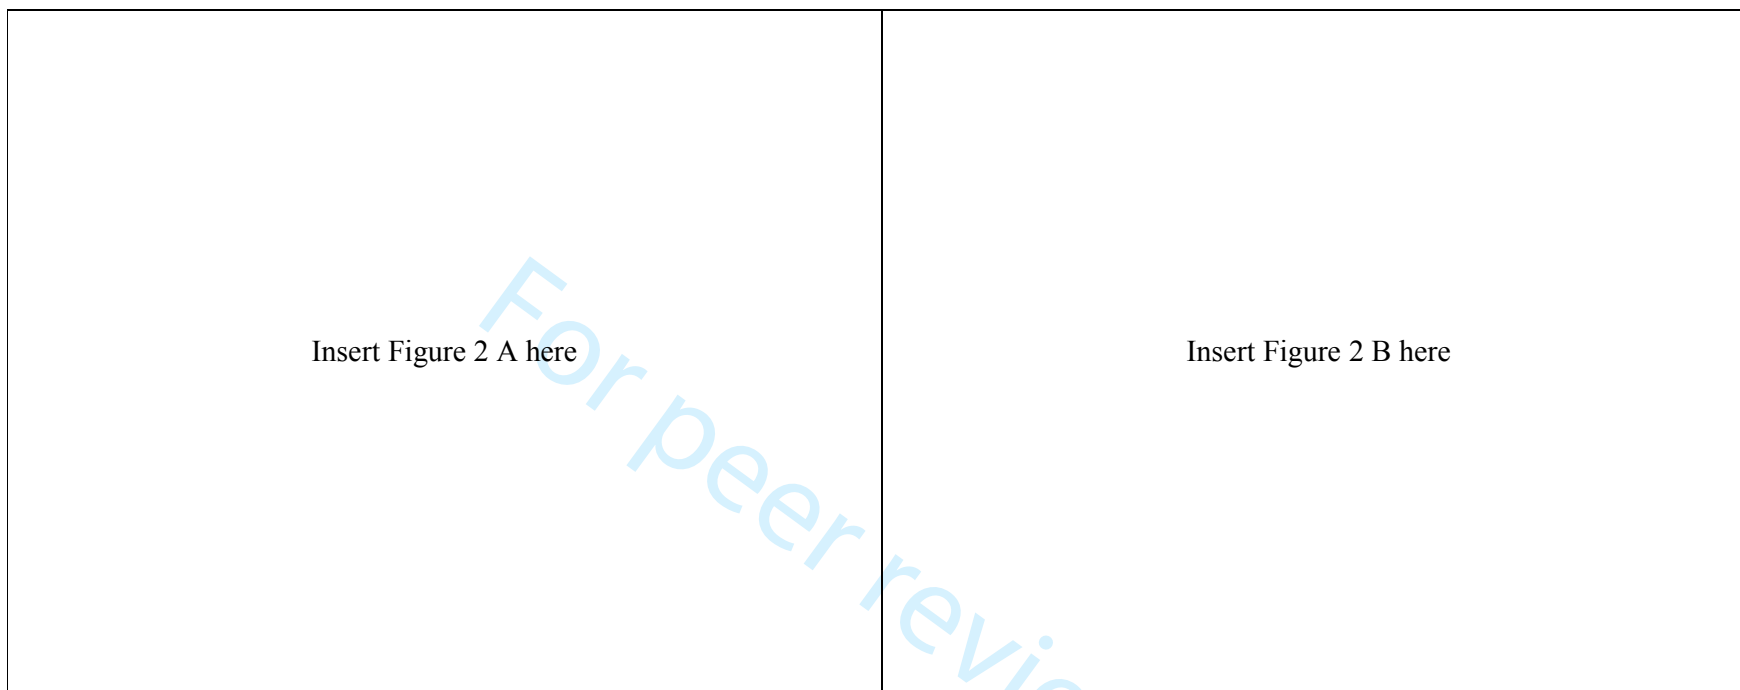

|                                    | Repeated measures ANOVA    |                       |                    |
|------------------------------------|----------------------------|-----------------------|--------------------|
|                                    | Main effect between groups | Main effect over time | Interaction effect |
| Opioids (Equivalent morphine (mg)) | $p < 0.001$                | $p < 0.001$           | $p < 0.001$        |
| DDD non-opioids                    | $p = 0.70$                 | $p < 0.001$           | $p < 0.001$        |

  

|                 | Bonferroni post hoc tests, (p-value) |         |         |       |       |       |       |
|-----------------|--------------------------------------|---------|---------|-------|-------|-------|-------|
|                 | Day 0                                | Day 1   | Day 2   | Day 3 | Day 4 | Day 5 | Day 6 |
| Opioids         | <0.0001                              | <0.0001 | <0.0001 | 1.00  | 1.00  | 1.00  | 1.00  |
| DDD non-opioids | 1.00                                 | <0.001  | 1.00    | 1.00  | 1.00  | 1.00  | 0.10  |

Figure 2. Consumption of analgesics after surgery in relation to occasion of measurement. Plots represent means and bars represent 95% confidence interval. Results of the repeated measures ANOVA and post hoc tests from Day 0 to the Day 6 assessment for equivalent morphine given and from Day 0 to Day 42 for DDD non-opioids are presented in the table below the diagram. Adjusted for malignant/benign condition. DDD = defined daily dose; EDA = epidural analgesia; ITM = intrathecal morphine analgesia.

1  
2  
3  
4  
5  
6  
7  
8  
9  
10  
11  
12  
13  
14  
15  
16  
17  
18  
19  
20  
21  
22  
23  
24  
25  
26  
27  
28  
29  
30  
31  
32  
33  
34  
35  
36  
37  
38  
39  
40  
41  
42  
43  
44  
45  
46  
47

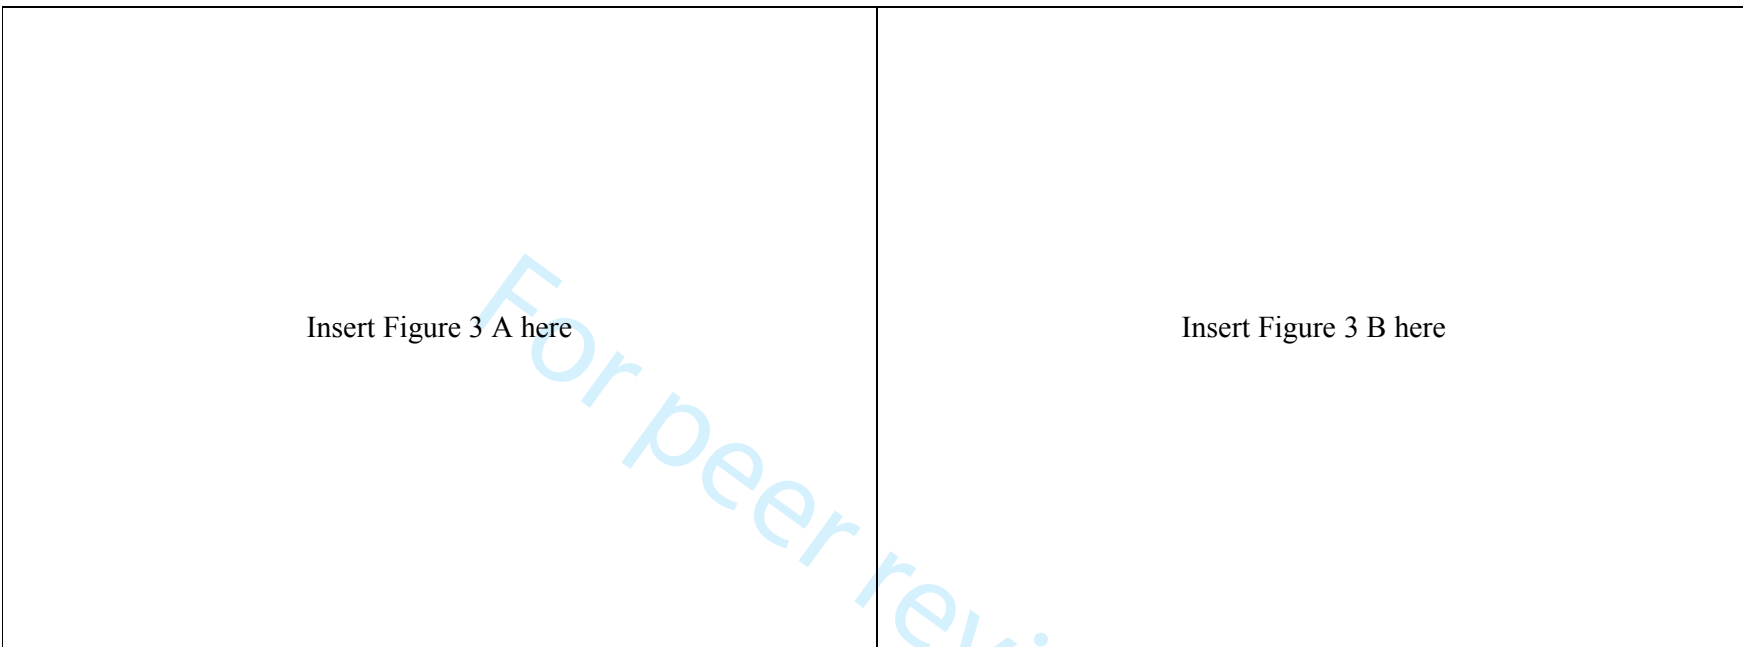

|                     |  | Repeated measures ANOVA    |                       |                    |
|---------------------|--|----------------------------|-----------------------|--------------------|
|                     |  | Main effect between groups | Main effect over time | Interaction effect |
| NRS at rest         |  | $p = 0.38$                 | $p < 0.001$           | $p < 0.001$        |
| NRS at mobilization |  | $p = 0.10$                 | $p < 0.001$           | $p < 0.001$        |

  

|                     |  | Bonferroni post hoc tests, (p-value) |         |         |         |         |         |         |         |         |         |         |         |         |         |         |         |         |         |         |
|---------------------|--|--------------------------------------|---------|---------|---------|---------|---------|---------|---------|---------|---------|---------|---------|---------|---------|---------|---------|---------|---------|---------|
|                     |  | Day 0.3                              | Day 1.1 | Day 1.2 | Day 1.3 | Day 2.1 | Day 2.2 | Day 2.3 | Day 3.1 | Day 3.2 | Day 3.3 | Day 4.1 | Day 4.2 | Day 4.3 | Day 5.1 | Day 5.2 | Day 5.3 | Day 6.1 | Day 6.2 | Day 6.3 |
| NRS at rest         |  | 1.00                                 | 1.00    | 0.12    | 1.00    | 1.00    | 1.00    | 1.00    | 1.00    | 1.00    | 0.13    | 1.00    | 1.00    | 1.00    | 1.00    | 1.00    | 1.00    | 1.00    | 1.00    | 1.00    |
| NRS at mobilization |  | 0.01                                 | 0.06    | 0.01    | 0.46    | 1.00    | 1.00    | 1.00    | 1.00    | 1.00    | 1.00    | 1.00    | 1.00    | 1.00    | 1.00    | 1.00    | 1.00    | 1.00    | 1.00    | 1.00    |

Figure 3. Assessment of pain by means of a 10 graded numeric rating scale (NRS) at rest and at mobilization. Plots represent means and bars represent 95% confidence interval. Results of the repeated measures ANOVA and post hoc tests from Day 0 to the Day 6. Assessments done from the evening of surgery and three times daily. Day 1.1, 1.2 and 1.3, respectively, represent the measurements performed in the morning, the afternoon and the evening on Day 1. Adjusted for malignant/benign condition. EDA = epidural analgesia; ITM = intrathecal morphine analgesia.

Insert Figure 4 here

Repeated measures ANOVA

| Main effect between groups | Main effect over time | Interaction effect |
|----------------------------|-----------------------|--------------------|
| $p = 0.32$                 | $p < 0.0001$          | $p = 0.25$         |

Bonferroni post hoc tests.  $p$ -values

| Day 0 | Day 1 | Day 2 | Day 3 | Day 4 | Day 5 | Day 6 | Day 7 | Day 14 | Day 21 | Day 28 | Day 35 | Day 42 |
|-------|-------|-------|-------|-------|-------|-------|-------|--------|--------|--------|--------|--------|
| 1.00  | 1.00  | 1.00  | 1.00  | 1.00  | 1.00  | 1.00  | 1.00  | 1.00   | 1.00   | 1.00   | 1.00   | 1.00   |

Figure 4. Illustration of EQ-5D weighted health state index in relation to occasion of measurement. Plots represent means and bars represent 95% confidence interval. Result of the repeated measures ANOVA and post hoc tests from Day 0 - 42 assessment is presented. Adjusted for malignant/benign condition. EDA = epidural analgesia; ITM = intrathecal morphine analgesia.

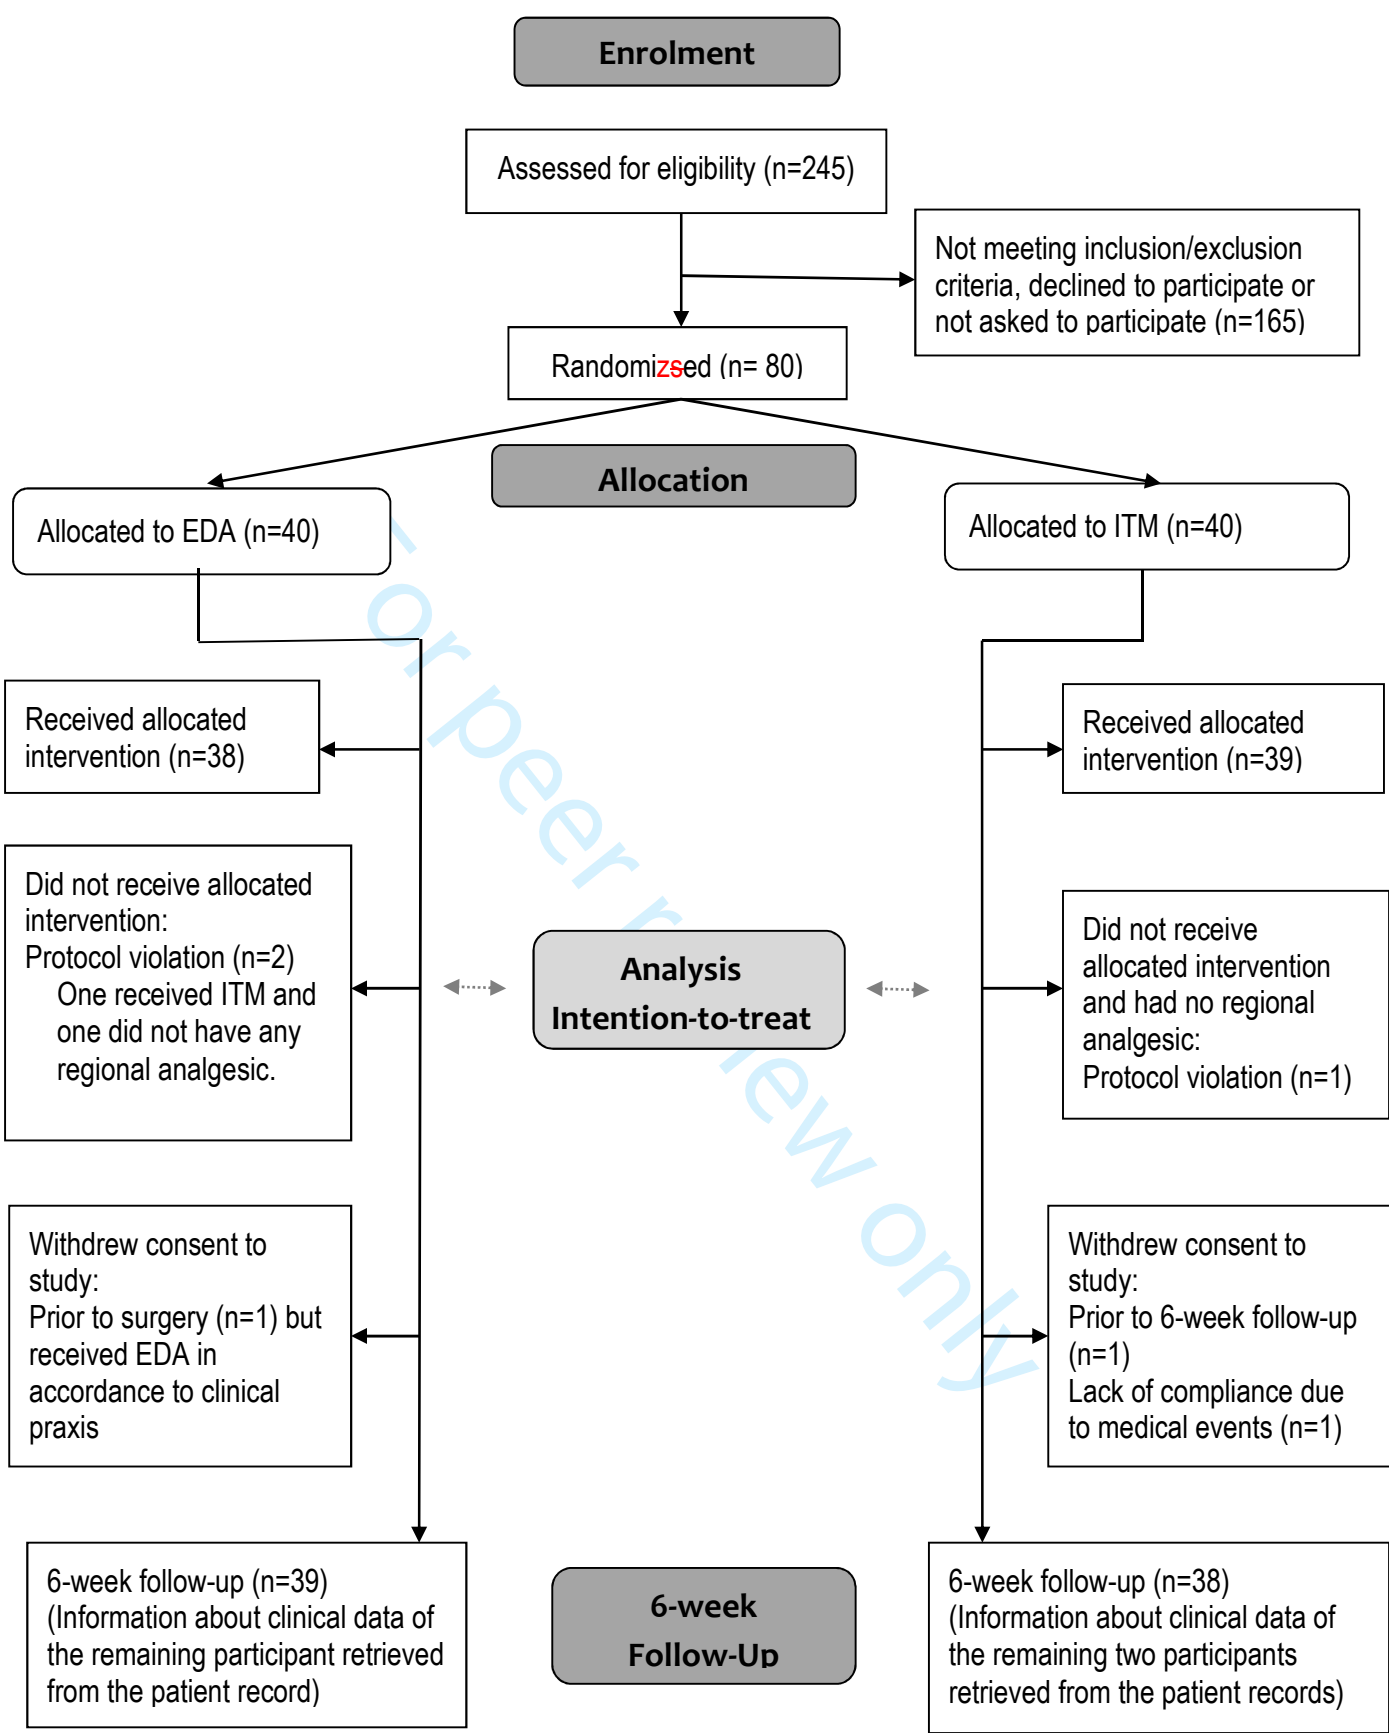

Figure 1.

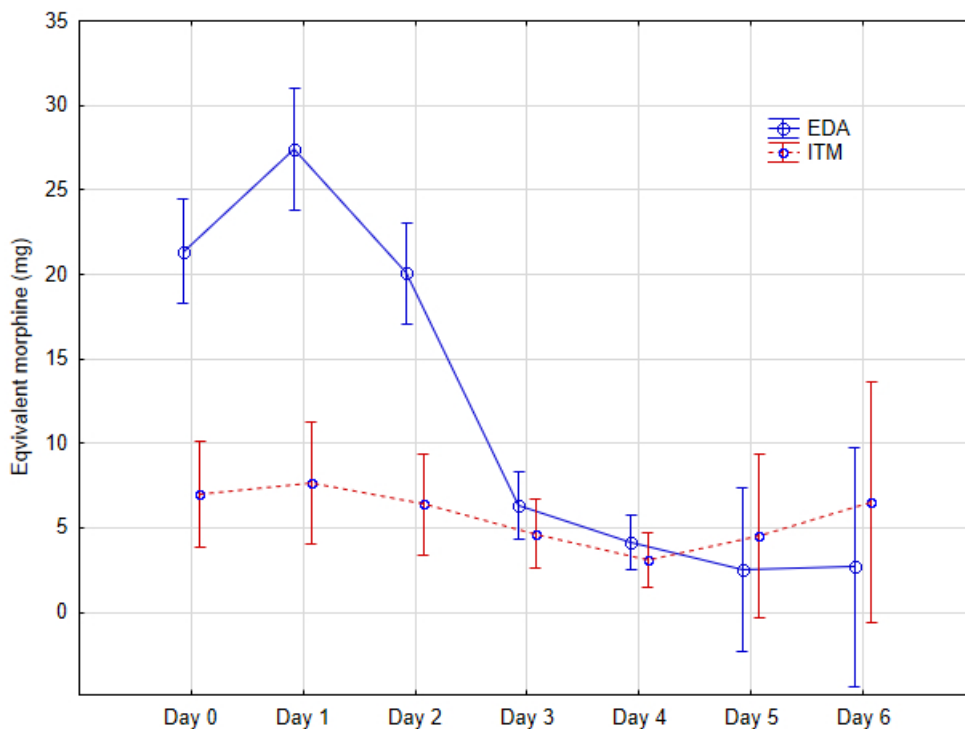

Figure 2A

165x123mm (96 x 96 DPI)



1  
2  
3  
4  
5  
6  
7  
8  
9  
10  
11  
12  
13  
14  
15  
16  
17  
18  
19  
20  
21  
22  
23  
24  
25  
26  
27  
28  
29  
30  
31  
32  
33  
34  
35  
36  
37  
38  
39  
40  
41  
42  
43  
44  
45  
46  
47  
48  
49  
50  
51  
52  
53  
54  
55  
56  
57  
58  
59  
60

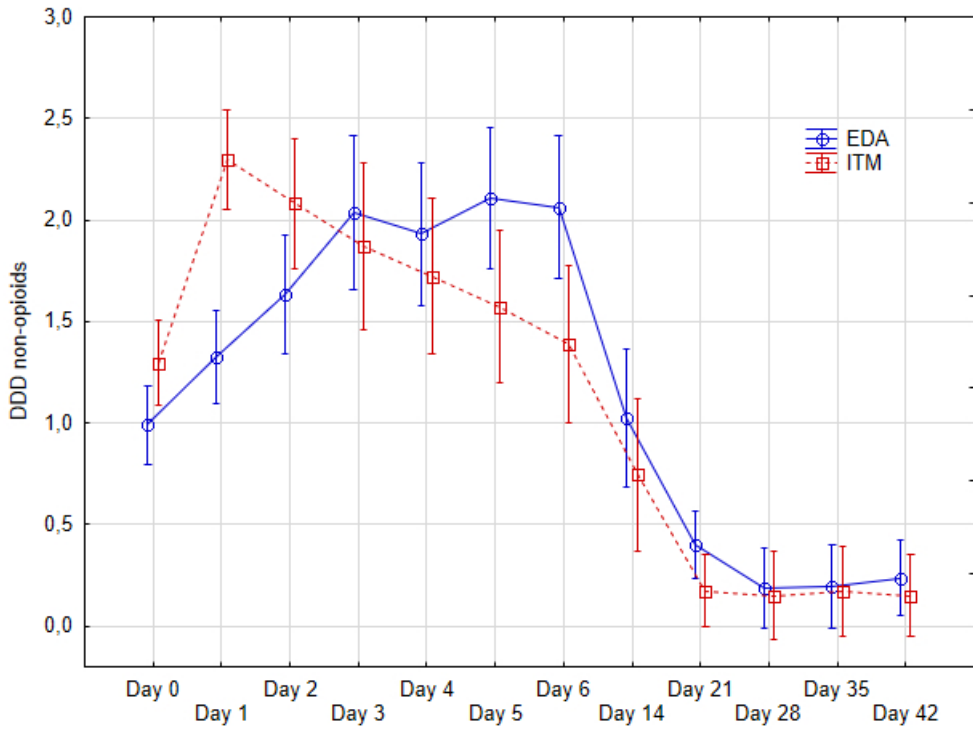

Figure 2B

165x123mm (96 x 96 DPI)

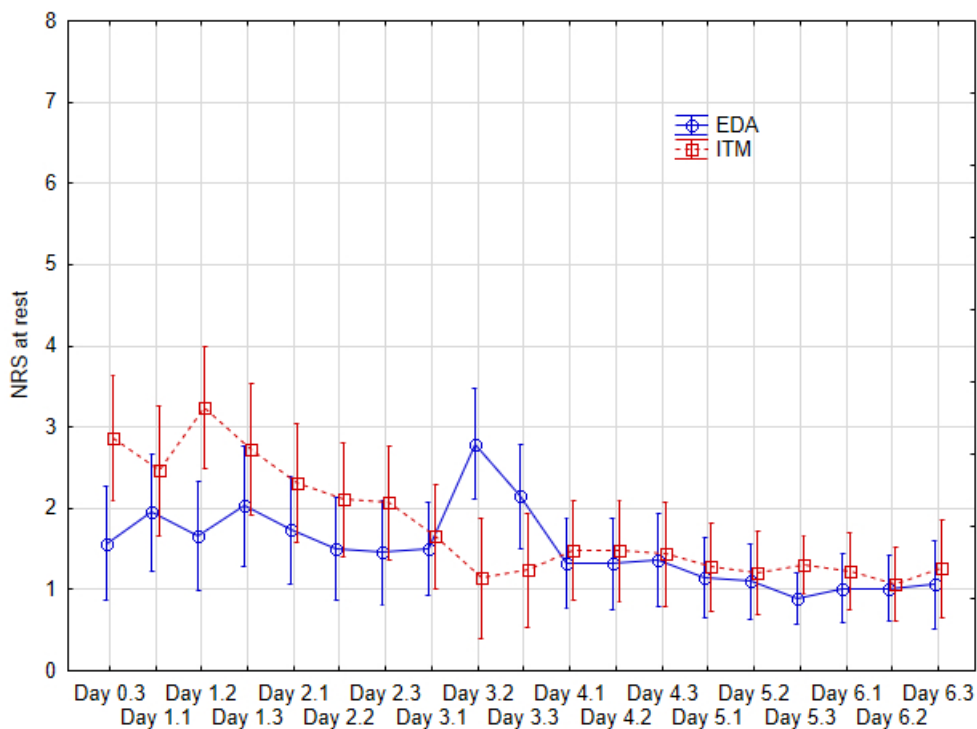

Figure 3A

165x123mm (96 x 96 DPI)

1  
2  
3  
4  
5  
6  
7  
8  
9  
10  
11  
12  
13  
14  
15  
16  
17  
18  
19  
20  
21  
22  
23  
24  
25  
26  
27  
28  
29  
30  
31  
32  
33  
34  
35  
36  
37  
38  
39  
40  
41  
42  
43  
44  
45  
46  
47  
48  
49  
50  
51  
52  
53  
54  
55  
56  
57  
58  
59  
60

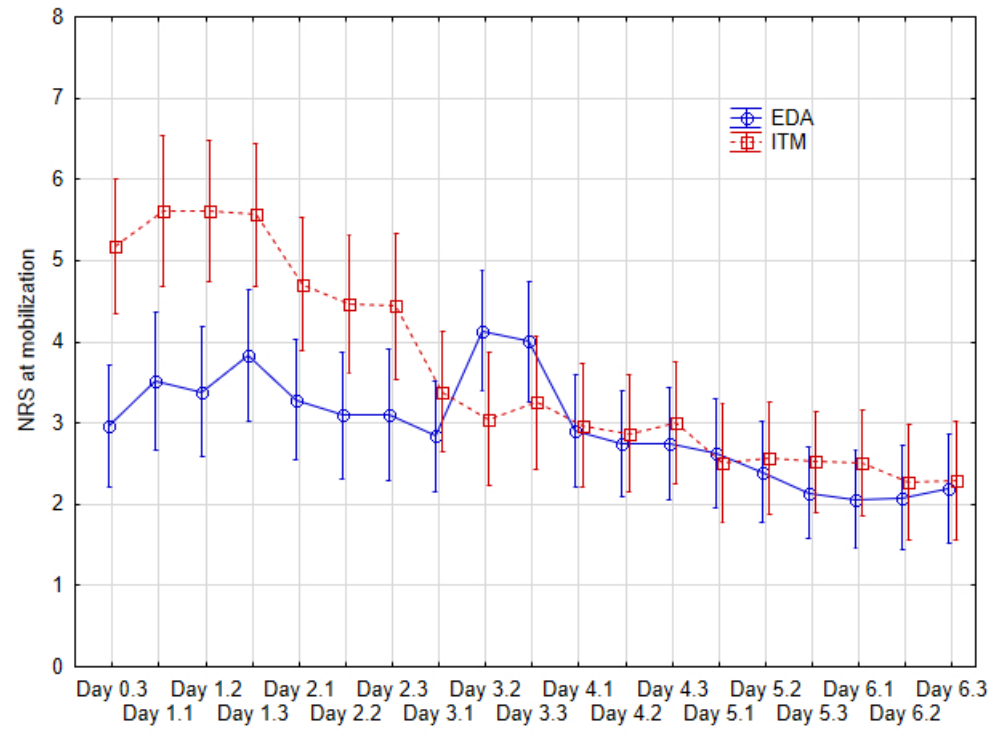

Figure 3B

165x123mm (96 x 96 DPI)

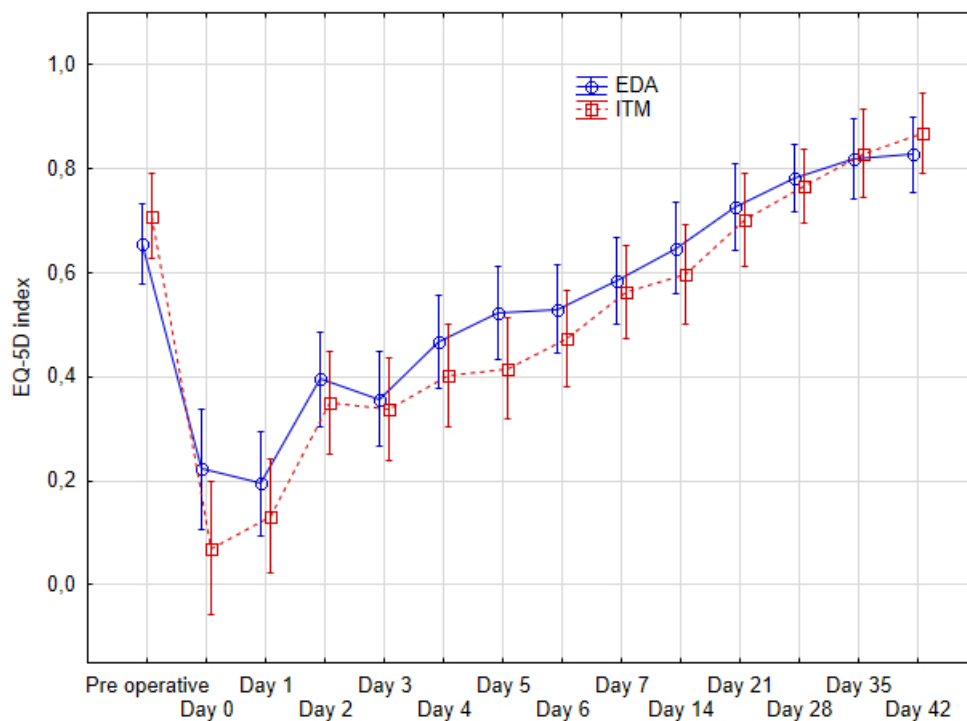

Figure 4

165x123mm (96 x 96 DPI)

# Reporting checklist for randomized trial.

Based on the CONSORT guidelines.

## Instructions to authors

Complete this checklist by entering the page numbers from your manuscript where readers will find each of the items listed below.

Your article may not currently address all the items on the checklist. Please modify your text to include the missing information. If you are certain that an item does not apply, please write "n/a" and provide a short explanation.

Upload your completed checklist as an extra file when you submit to a journal.

In your methods section, say that you used the CONSORT reporting guidelines, and cite them as:

Schulz KF, Altman DG, Moher D, for the CONSORT Group. CONSORT 2010 Statement: updated guidelines for reporting parallel group randomised trials

|                           |                     | Reporting Item                                                                                                    | Page Number |
|---------------------------|---------------------|-------------------------------------------------------------------------------------------------------------------|-------------|
| Title                     | <a href="#">#1a</a> | Identification as a randomized trial in the title.                                                                | 1           |
| Abstract                  | <a href="#">#1b</a> | Structured summary of trial design, methods, results, and conclusions                                             | 2           |
| Background and objectives | <a href="#">#2a</a> | Scientific background and explanation of rationale                                                                | 4           |
|                           | <a href="#">#2b</a> | Specific objectives or hypothesis                                                                                 | 4           |
| Trial design              | <a href="#">#3a</a> | Description of trial design (such as parallel, factorial) including allocation ratio.                             | 5           |
|                           | <a href="#">#3b</a> | Important changes to methods after trial commencement (such as eligibility criteria), with reasons                | Na          |
| Participants              | <a href="#">#4a</a> | Eligibility criteria for participants                                                                             | 5           |
|                           | <a href="#">#4b</a> | Settings and locations where the data were collected                                                              | 5           |
| Interventions             | <a href="#">#5</a>  | The experimental and control interventions for each group with sufficient details to allow replication, including | 5-6         |

|    |                        |                                                                                  |          |
|----|------------------------|----------------------------------------------------------------------------------|----------|
|    |                        | how and when they were actually administered                                     |          |
| 1  |                        |                                                                                  |          |
| 2  | Outcomes               | <a href="#">#6a</a> Completely defined prespecified primary and secondary        | 4-6      |
| 3  |                        | outcome measures, including how and when they were                               |          |
| 4  |                        | assessed                                                                         |          |
| 5  |                        |                                                                                  |          |
| 6  |                        |                                                                                  |          |
| 7  | Sample size            | <a href="#">#7a</a> How sample size was determined.                              | 7        |
| 8  |                        |                                                                                  |          |
| 9  |                        |                                                                                  |          |
| 10 |                        | <a href="#">#7b</a> When applicable, explanation of any interim analyses         | NA       |
| 11 |                        | and stopping guidelines                                                          |          |
| 12 |                        |                                                                                  |          |
| 13 | Randomization -        | <a href="#">#8a</a> Method used to generate the random allocation                | 5        |
| 14 | Sequence generation    | sequence.                                                                        |          |
| 15 |                        |                                                                                  |          |
| 16 |                        | <a href="#">#8b</a> Type of randomization; details of any restriction (such as   | 5        |
| 17 |                        | blocking and block size)                                                         |          |
| 18 |                        |                                                                                  |          |
| 19 | Randomization -        | <a href="#">#9</a> Mechanism used to implement the random allocation             | 5        |
| 20 | Allocation concealment | sequence (such as sequentially numbered containers),                             |          |
| 21 | mechanism              | describing any steps taken to conceal the sequence until                         |          |
| 22 |                        | interventions were assigned                                                      |          |
| 23 |                        |                                                                                  |          |
| 24 | Randomization -        | <a href="#">#10</a> Who generated the allocation sequence, who enrolled          | 5        |
| 25 | Implementation         | participants, and who assigned participants to                                   |          |
| 26 |                        | interventions                                                                    |          |
| 27 |                        |                                                                                  |          |
| 28 | Blinding               | <a href="#">#11a</a> If done, who was blinded after assignment to                | NA       |
| 29 |                        | interventions (for example, participants, care providers,                        |          |
| 30 |                        | those assessing outcomes) and how.                                               |          |
| 31 |                        |                                                                                  |          |
| 32 |                        | <a href="#">#11b</a> If relevant, description of the similarity of interventions | NA       |
| 33 |                        |                                                                                  |          |
| 34 | Statistical methods    | <a href="#">#12a</a> Statistical methods used to compare groups for primary      | 9        |
| 35 |                        | and secondary outcomes                                                           |          |
| 36 |                        |                                                                                  |          |
| 37 |                        | <a href="#">#12b</a> Methods for additional analyses, such as subgroup           | 9        |
| 38 |                        | analyses and adjusted analyses                                                   |          |
| 39 |                        |                                                                                  |          |
| 40 | Participant flow       | <a href="#">#13a</a> A diagram is strongly recommended. For each group,          | Figure 1 |
| 41 | diagram (strongly      | the numbers of participants who were randomly                                    |          |
| 42 | recommended)           | assigned, received intended treatment, and were                                  |          |
| 43 |                        | analysed for the primary outcome                                                 |          |
| 44 |                        |                                                                                  |          |
| 45 | Participant flow       | <a href="#">#13b</a> For each group, losses and exclusions after                 | Figure 1 |
| 46 |                        | randomization, together with reason                                              |          |
| 47 |                        |                                                                                  |          |
| 48 |                        |                                                                                  |          |
| 49 |                        |                                                                                  |          |
| 50 |                        |                                                                                  |          |
| 51 |                        |                                                                                  |          |
| 52 |                        |                                                                                  |          |
| 53 |                        |                                                                                  |          |
| 54 |                        |                                                                                  |          |
| 55 |                        |                                                                                  |          |
| 56 |                        |                                                                                  |          |
| 57 |                        |                                                                                  |          |
| 58 |                        |                                                                                  |          |
| 59 |                        |                                                                                  |          |
| 60 |                        |                                                                                  |          |

|    |                         |                      |                                                                                                                                                   |                 |
|----|-------------------------|----------------------|---------------------------------------------------------------------------------------------------------------------------------------------------|-----------------|
| 1  | Recruitment             | <a href="#">#14a</a> | Dates defining the periods of recruitment and follow-up                                                                                           | 5               |
| 2  |                         |                      |                                                                                                                                                   |                 |
| 3  |                         | <a href="#">#14b</a> | Why the trial ended or was stopped                                                                                                                | NA              |
| 4  |                         |                      |                                                                                                                                                   |                 |
| 5  | Baseline data           | <a href="#">#15</a>  | A table showing baseline demographic and clinical characteristics for each group                                                                  | Table 1         |
| 6  |                         |                      |                                                                                                                                                   |                 |
| 7  |                         |                      |                                                                                                                                                   |                 |
| 8  |                         |                      |                                                                                                                                                   |                 |
| 9  | Numbers analysed        | <a href="#">#16</a>  | For each group, number of participants (denominator) included in each analysis and whether the analysis was by original assigned groups           | Tables 1,2,4    |
| 10 |                         |                      |                                                                                                                                                   |                 |
| 11 |                         |                      |                                                                                                                                                   |                 |
| 12 |                         |                      |                                                                                                                                                   |                 |
| 13 |                         |                      |                                                                                                                                                   |                 |
| 14 | Outcomes and estimation | <a href="#">#17a</a> | For each primary and secondary outcome, results for each group, and the estimated effect size and its precision (such as 95% confidence interval) | 8, Figures 2-4  |
| 15 |                         |                      |                                                                                                                                                   |                 |
| 16 |                         | <a href="#">#17b</a> | For binary outcomes, presentation of both absolute and relative effect sizes is recommended                                                       | NA              |
| 17 |                         |                      |                                                                                                                                                   |                 |
| 18 |                         |                      |                                                                                                                                                   |                 |
| 19 |                         |                      |                                                                                                                                                   |                 |
| 20 | Ancillary analyses      | <a href="#">#18</a>  | Results of any other analyses performed, including subgroup analyses and adjusted analyses, distinguishing pre-specified from exploratory         | NA              |
| 21 |                         |                      |                                                                                                                                                   |                 |
| 22 |                         |                      |                                                                                                                                                   |                 |
| 23 |                         |                      |                                                                                                                                                   |                 |
| 24 |                         |                      |                                                                                                                                                   |                 |
| 25 |                         |                      |                                                                                                                                                   |                 |
| 26 |                         |                      |                                                                                                                                                   |                 |
| 27 |                         |                      |                                                                                                                                                   |                 |
| 28 |                         |                      |                                                                                                                                                   |                 |
| 29 | Harms                   | <a href="#">#19</a>  | All important harms or unintended effects in each group (For specific guidance see CONSORT for harms)                                             | 10, Table 4     |
| 30 |                         |                      |                                                                                                                                                   |                 |
| 31 |                         |                      |                                                                                                                                                   |                 |
| 32 |                         |                      |                                                                                                                                                   |                 |
| 33 | Limitations             | <a href="#">#20</a>  | Trial limitations, addressing sources of potential bias, imprecision, and, if relevant, multiplicity of analyses                                  | 11-12           |
| 34 |                         |                      |                                                                                                                                                   |                 |
| 35 |                         |                      |                                                                                                                                                   |                 |
| 36 |                         |                      |                                                                                                                                                   |                 |
| 37 | Interpretation          | <a href="#">#22</a>  | Interpretation consistent with results, balancing benefits and harms, and considering other relevant evidence                                     | 11-12           |
| 38 |                         |                      |                                                                                                                                                   |                 |
| 39 |                         |                      |                                                                                                                                                   |                 |
| 40 |                         |                      |                                                                                                                                                   |                 |
| 41 | Registration            | <a href="#">#23</a>  | Registration number and name of trial registry                                                                                                    | 2               |
| 42 |                         |                      |                                                                                                                                                   |                 |
| 43 | Protocol                | <a href="#">#24</a>  | Where the full trial protocol can be accessed, if available                                                                                       | Se Cover letter |
| 44 |                         |                      |                                                                                                                                                   |                 |
| 45 |                         |                      |                                                                                                                                                   |                 |
| 46 |                         |                      |                                                                                                                                                   |                 |
| 47 | Funding                 | <a href="#">#25</a>  | Sources of funding and other support (such as supply of drugs), role of funders                                                                   | 3               |
| 48 |                         |                      |                                                                                                                                                   |                 |
| 49 |                         |                      |                                                                                                                                                   |                 |

50  
 51 The CONSORT checklist is distributed under the terms of the Creative Commons Attribution License  
 52 CC-BY. This checklist can be completed online using <https://www.goodreports.org/>, a tool made by  
 53 the [EQUATOR Network](#) in collaboration with [Penelope.ai](#)  
 54  
 55  
 56  
 57  
 58  
 59  
 60

# BMJ Open

## The effect of intrathecal morphine and epidural analgesia on postoperative recovery after abdominal surgery for gynecologic malignancy. An open-label randomized trial.

|                                 |                                                                                                                                                                                                                                                                                                                                                                                                                       |
|---------------------------------|-----------------------------------------------------------------------------------------------------------------------------------------------------------------------------------------------------------------------------------------------------------------------------------------------------------------------------------------------------------------------------------------------------------------------|
| Journal:                        | <i>BMJ Open</i>                                                                                                                                                                                                                                                                                                                                                                                                       |
| Manuscript ID                   | bmjopen-2018-024484.R1                                                                                                                                                                                                                                                                                                                                                                                                |
| Article Type:                   | Research                                                                                                                                                                                                                                                                                                                                                                                                              |
| Date Submitted by the Author:   | 30-Oct-2018                                                                                                                                                                                                                                                                                                                                                                                                           |
| Complete List of Authors:       | Kjølhed, Preben; Department of obstetrics and Gynecology, Department of experimental and clinical medicine<br>Bergdahl, Olga; Vrinnevisjukhuset i Norrköping, Department of Obstetrics and Gynecology<br>Borendal Wodlin, Ninnie; Linköpings Universitet Institutionen för klinisk och experimentell medicin, Dept. of Obstetrics and Gynecology<br>Nilsson, Lena; Region Östergötland, Anesthesia and Intensive care |
| <b>Primary Subject Heading</b>: | Obstetrics and gynaecology                                                                                                                                                                                                                                                                                                                                                                                            |
| Secondary Subject Heading:      | Anaesthesia, Surgery, Oncology                                                                                                                                                                                                                                                                                                                                                                                        |
| Keywords:                       | Gynaecological oncology < GYNAECOLOGY, Quality in health care < HEALTH SERVICES ADMINISTRATION & MANAGEMENT, Adult surgery < SURGERY, Anaesthesia in oncology < ANAESTHETICS                                                                                                                                                                                                                                          |
|                                 |                                                                                                                                                                                                                                                                                                                                                                                                                       |

SCHOLARONE™  
Manuscripts



1  
2 *A Research Article entitled*

3  
4  
5  
6 ***The effect of intrathecal morphine and epidural analgesia on***  
7 ***postoperative recovery after abdominal surgery for gynecologic***  
8 ***malignancy. An open-label randomized trial.***  
9  
10  
11  
12  
13  
14  
15  
16

17 Authors:

18  
19  
20 Preben Kjølhed<sup>1</sup>, MD, PhD, Olga Bergdahl<sup>2</sup>, MD, Ninnie Borendal Wodlin<sup>1</sup>, MD,  
21  
22 PhD and Lena Nilsson<sup>3</sup>, MD, PhD.  
23  
24

25 Affiliations:

26  
27 <sup>1</sup> Department of Obstetrics and Gynecology, and Department of Clinical and Experimental  
28 Medicine, Linköping University, Linköping, Sweden

29  
30 <sup>2</sup> Department of Obstetrics and Gynecology, and Department of Clinical and Experimental  
31 Medicine, Linköping University, Norrköping, Sweden

32  
33 <sup>3</sup> Department of Anesthesiology and Intensive Care, and Department of Medical and Health  
34 Sciences, Linköping University, Linköping, Sweden.  
35  
36  
37  
38

39 Corresponding author:

40 Preben Kjølhed, MD, PhD  
41 Department of Obstetrics and Gynecology  
42 University Hospital  
43 S-581 85 Linköping  
44 Sweden  
45 Phone: +46 101033187  
46 E-mail: [Preben.Kjohlhede@liu.se](mailto:Preben.Kjohlhede@liu.se)  
47  
48  
49  
50  
51

52 Word count: 3390  
53  
54  
55  
56  
57  
58  
59  
60

## Abstract

**Objectives:** We aimed to determine whether regional analgesia with intrathecal morphine (ITM) in an enhanced recovery program (ERAS) gives a shorter hospital stay with good pain relief and equal health-related quality of life (QoL) to epidural analgesia (EDA) in women after midline laparotomy for proven or assumed gynecological malignancies.

**Design:** An open-label, randomized, single center study.

**Setting:** A tertiary referral Swedish university hospital.

**Participants:** Eighty women, 18-70 years of age, ASA I and II, admitted consecutively to the department of Obstetrics and Gynecology.

**Interventions:** The women were allocated (1:1) to either the standard analgesic method at the clinic (EDA) or the experimental treatment (ITM). An ERAS protocol with standardized perioperative routines and standardized general anesthesia were applied. The EDA or ITM started immediately preoperatively. The ITM group received morphine, clonidine and bupivacaine intrathecally; the EDA group had an epidural infusion of bupivacaine, adrenalin and fentanyl.

**Primary and secondary outcome measures:** Primary endpoint was length of hospital stay (LOS). Secondary endpoints were QoL and pain assessments.

**Results:** The LOS was statistically significantly shorter for the ITM group compared with the EDA group (median (IQR) 3.3 (1.5-56.3) vs. 4.3 (2.2-43.2) days;  $p=0.01$ ). No differences were observed in pain assessment or QoL. The ITM group used postoperatively the first week significantly less opioids than the EDA group, (median (IQR) 20 mg (14-35 mg) vs. 81 mg (67-101 mg;  $p<0.0001$ ). No serious adverse events were attributed to ITM or EDA.

**Conclusions:** Compared with EDA, ITM is simpler to administer and manage, is associated with shorter hospital stay and reduces opioid consumption postoperatively with an equally good QoL. ITM is effective as postoperative analgesia in gynecological cancer surgery.

**Trial registration number:** Clinical Trials NCT02026687

**Keywords:** Regional analgesia; Gynecological malignancy; Laparotomy; Opioid consumption; Quality improvement

## ARTICLE SUMMARY

### STRENGTHS AND LIMITATIONS OF THIS STUDY

- This study evaluates quality improvement on postoperative recovery after gynecological cancer surgery in an enhanced recovery after surgery setting.
- The study is an open randomized controlled trial.
- The experimental treatment (intrathecal morphine) was compared with the standard care of postoperative analgesia (epidural analgesic) used in our setting.
- The objective was to compare the two analgesic methods in a clinical relevant multimodal context, not to find the appropriate doses or types of analgesic agent for each method.

### FUNDING STATEMENT

The study was supported financially by grants from the Swedish Society of Medicine (SLS-404711), the Medical Research Council of South-east Sweden (FORSS-8685), Linköping University and the Region Östergötland (LIO-356191, LIO-441781).

### COMPETING INTERESTS

The authors declare that they have no competing interests.

### DATA SHARING STATEMENT

No additional data are available.

## INTRODUCTION

Pain is an important component in the assessment of health-related quality of life (QoL). Besides the human suffering, insufficiently treated postoperative pain complicates mobilization, increases the risk for complications and might prolong hospitalization.

Regional analgesia with epidural analgesia (EDA) in abdominal surgery is recommended in most enhanced recovery after surgery (ERAS) protocols for use both during surgery and postoperatively.[1,2] Single-dose intrathecal morphine provide good analgesia during the first postoperative days after abdominal cancer surgery,[3-6] and improves the recovery after hysterectomy for benign conditions.[7,8] An additional analgesic effect can be obtained by adding the  $\alpha$ -adrenergic agonist clonidine intrathecally.[4,9,10] In surgery for malignant gynecological diseases intrathecal morphine has been less described, although Kara et al. [11] in 2012 reported reduced morphine consumption and no increase in side effects. A few randomized studies have compared single-dose intrathecal morphine with continuous EDA after major abdominal surgery, showing disputed results concerning pain relief and hospital stay.[12-14]

Based on the potential benefits of intrathecal morphine as an effective and technically simple applied postoperative analgesic we designed this randomized study to compare the effects of a single-dose intrathecal combined morphine and clonidine (ITM) with the standard of care in the hospital using EDA in an ERAS program for abdominal surgery for proven or assumed gynecological malignant tumors.

The aim of the study was to determine whether ITM when compared with EDA in an ERAS program, shorten hospital stay with a similar patient experienced QoL.

## MATERIAL AND METHODS

We conducted an open-label, randomized, controlled, single center study in accordance with Good Clinical Practice guidelines.[15] From March 2014 to January 2016 all women who were admitted to the department of Obstetrics and Gynecology, University Hospital, Linköping, Sweden due to a proven or assumed gynecological abdominal malignancy were eligible for the study. Women 18 to 70 years, World Health Organization (WHO) performance status < 2, American Society of Anesthesiologists (ASA) score < 3 and speaking Swedish fluently were included. Exclusion criteria were contraindications against regional analgesia, physical or psychiatric disability and surgery where pain could not be expected to be controlled by the regional analgesia. Oral and written informed consent was obtained from all participants.

At the preoperative visit the women were allocated to ITM and EDA, 1:1, from a computer-generated randomization code,[16] using sealed opaque envelopes. The participant was informed about the allocation.

Surgery was conducted through a midline laparotomy with the preoperative intention to obtain macroscopically radical tumor resection. If this was not possible the tumor burden was either to be reduced to the minimal residual tumor (less than 1 cm in size) or samples were to be obtained, preferably by salpingo-oophorectomy, in order to establish the histopathological diagnosis. Board-certified gynecological oncologists performed the surgery. The surgical technique used was at the discretion of the surgeon.

All women received thrombosis prophylaxis (tinzaparin 4500 anti-Xa IE subcutaneously) once daily for 28 days beginning the evening before the surgery, and prophylactic antibiotics (1.5 gram cefuroxime and 1.0 gram metronidazole intravenously (iv.) as a single dose) before surgery start.

All women received a standardized premedication with paracetamol 1995 mg. The allocated intervention of regional analgesic was applied prior to commencing the general anesthesia. The experimental treatment group (the ITM) had an intrathecal combination of a single dose isobar bupivacaine 15 mg, morphine 0.2 mg and clonidine 75µg, preferably through a 25G spinal needle. The EDA group had the standard EDA regime used in the hospital. The EDA was performed by a low thoracic puncture. The epidural infusion was started after induction of the general anesthesia but before surgery by a bolus dose of fentanyl 50-100 µg and a bolus from a mixture of bupivacaine 2.4 mg/ml, adrenalin 2.4 µg/ml and fentanyl 1.8 µg/ml. The same mixture was used as a continuous infusion, typically 4-8 ml/h, throughout surgery.

General anesthesia was standardized in both groups: induction with fentanyl and propofol, intubation facilitated with rocuronium and maintenance with sevoflurane. Fentanyl and rocuronium was repeated if needed. All patients had a gastric tube and an indwelling urinary catheter. The

1  
2 gastric tube was removed before waking the patient up. Local anesthetic (40 ml bupivacaine 2.5  
3 mg/ml) was injected prefascially and subcutaneously in the abdominal wall in the area of the skin  
4 incision.  
5  
6

7 After the initial monitoring at the postoperative care unit, the postoperative pain management  
8 including surveillance of possible opioid side effects and neurological complications took place at  
9 the gynecological ward and followed the routines outlined by the Swedish Society of  
10 Anesthesiology and Intensive Care.[17]  
11  
12

13  
14 The women in the ITM group received oral paracetamol 1330 mg and diclofenac 50 mg, both  
15 three times daily started on the day of surgery. Oxycodone 10-20 mg twice daily was added on the  
16 first postoperative day.  
17  
18

19 For the EDA group, a continuous epidural infusion of a mixture of bupivacain 1 mg/ml +  
20 adrenalin 2µg/ml + fentanyl 2 µg/ml including the possibility of additional patient-controlled bolus  
21 doses was started postoperatively at the postoperative care unit and continued until the morning of  
22 the third postoperative day. The infusion rate, normally 4-8 ml/h, and bolus doses, normally 2 ml,  
23 were decided on by the responsible physician. The patients also had oral paracetamol 1330 mg three  
24 times daily, starting on the day of surgery. Oral oxycodone 10-20 mg twice daily and diclofenac 50  
25 mg three times daily were added in the morning of the third postoperative day before removal of the  
26 epidural catheter according to the guidelines.[17]  
27  
28  
29  
30  
31  
32

33 Rescue opioids were the same for both groups; iv. morphine, 0.5-1 mg, iv. or oxycodone 5 mg  
34 orally was given if needed. In case of obvious pain relieving failure with the ITM or EDA iv.  
35 patient-controlled analgesia with morphine was started.  
36  
37

38 To quantify the amount of non-opioid analgesics given the defined daily dose (DDD)  
39 methodology was used.[18] All opioids, independent of administration route and including the ITM  
40 and the EDA, were converted to an equivalent iv. morphine dose.[19,20]  
41  
42

43 A numerical rating scale (NRS) 0-10 was used to assess the pain three times daily (8 am, 4  
44 pm, 10 pm) at rest and at mobilization, i.e. when moving out of bed, raising both legs when in bed  
45 or when giving a strong cough.  
46  
47

48 The standardized criteria for discharge were: the patient was mobilized, tolerated a normal  
49 diet, had sufficient pain relief with oral analgesics (NRS  $\leq$  4), showed no signs of mechanical bowel  
50 obstruction and had voided spontaneously with less than 150 ml residual urine. If the last criterion  
51 was not met, the woman went home with the catheter, which was removed polyclinically. The  
52 discharge criteria were checked twice daily. The decision on discharge was made according to the  
53 medical criteria but could be prolonged by social or other practical, personal conditions. Both the *de*  
54 *facto* hospital stay (LOS) and the length of the stay until the discharge criteria were met were  
55 calculated.  
56  
57  
58  
59  
60

1  
2 The research nurse had telephone contact with the participants the day after discharge and  
3 then once a week until six weeks postoperatively. Adverse events were registered and graded  
4 according to the Clavien-Dindo classification.[21] The study was completed after the six-week  
5 contact.  
6  
7

8  
9 The QoL was assessed by two commonly used validated generic QoL forms. The EQ-5D form  
10 was completed preoperatively, daily during the first week after surgery, then once weekly until the  
11 six-week postoperative visit. [22] The Short Form – 36 Health Survey (SF-36) form was completed  
12 preoperatively (baseline) and six weeks postoperatively.[23]  
13  
14

### 15 **Trial outcomes**

16  
17 The primary endpoint was the de facto duration of hospital stay (LOS). Secondary outcome  
18 measurers were QoL and pain assessments. As secondary post hoc outcomes we also registered the  
19 analgesic consumption, time to meet standardized discharge criteria, proportion of women  
20 discharged on the third postoperative day and adverse events.  
21  
22

### 23 **Patient involvement**

24  
25 Patients were not involved in the study design or conduct of the study. By assessing QoL as part of  
26 the protocol, the patients reported a surrogate measure of the burden of the intervention.  
27  
28

### 29 **Ethical approval**

30  
31 The study was approved by the Regional Ethics Board of Linköping University (D.nr. 2013/185-31,  
32 approval date 29 August 2013), the Swedish Medical Products Agency (Eu-nr. 2013-001873-25;  
33 D.nr. 5.1-2013-50334, approval date 1 August 2013) and monitored by an independent monitor.  
34  
35

### 36 **Statistics**

37  
38 Sample size calculation was based on the primary outcome endpoint. From our earlier studies on  
39 abdominal hysterectomy using ITM in an ERAS setting [7] the standard deviation for LOS was  
40 0.75 days. Providing that the minimum clinical relevant difference in hospital stay between the  
41 groups was 0.5 days, each group should consist of 40 women including a 10% dropout rate in order  
42 to show statistical significance at a 5% level with an 80% power.  
43  
44

45  
46 Data are presented as median (inter quartile range), mean and (95% confidence interval) or  
47 number (percent).  $\chi^2$  tests and Fisher's exact tests were used to analyze categorical data and Mann-  
48 Whitney U-tests and Wilcoxon matched pair tests for continuous data.  
49  
50

51  
52 A repeated measures analysis of variance (ANOVA) was used to analyze data measured on  
53 more occasions. When  $p \leq 0.10$  in the analysis of the main effect between groups in the repeated  
54 measures ANOVA, the pairwise associations between groups on each single occasion of  
55 measurement were analyzed using the Bonferroni post hoc test.  
56  
57  
58  
59  
60

1  
2 The significance level was set at  $p < 0.05$ . The statistical tests were two-tailed. All analyses  
3 were carried out according to intention-to-treat principles using Statistica v13.2 (Dell Software, 5  
4 Polaris Way, Aliso Viejo, CA 92656, USA).  
5  
6  
7  
8  
9  
10  
11  
12  
13  
14  
15  
16  
17  
18  
19  
20  
21  
22  
23  
24  
25  
26  
27  
28  
29  
30  
31  
32  
33  
34  
35  
36  
37  
38  
39  
40  
41  
42  
43  
44  
45  
46  
47  
48  
49  
50  
51  
52  
53  
54  
55  
56  
57  
58  
59  
60

For peer review only



## RESULTS

The description of the selection and the randomization of the study population is presented in Figure 1. Forty women were chosen to receive EDA and 40 to receive ITM. One woman in each group did not receive any regional analgesia and one woman had ITM instead of EDA based on a mistake by the attending anesthesiologist.

The descriptive and demographic data are shown in Table 1. The clinical surgical and anesthesiological data are presented in Table 2.

In 20% the final diagnosis postoperatively was benign, most often showing a benign ovarian tumor or a large uterine fibroid. The benign diseases were evenly distributed between the two groups.

The LOS was statistically significantly shorter for the ITM group compared with the EDA group (median (IQR) 3.3 (3.1-4.8) vs. 4.3 (3.4-5.2) days;  $p=0.01$ ). The time to meet standardized discharge criteria was significantly shorter in the ITM group compared with the EDA group (median (IQR) 3.0 (2.5-3.5) vs. 4.0 (3.5-4.5) days;  $p<0.001$ ). Significantly more women in the ITM group were discharged from the hospital on the third day (25 women (62.5%) in the ITM group vs. 12 (30%) in the EDA group, ( $p=0.004$ ).

The ITM group had a significantly lower total consumption of opioids than the EDA group whereas the use of non-opioids was similar in the two groups (Figure 2 and 3). Postoperatively, during day 0 to day 6 the total consumption of opioids were median (IQR) 20 mg (14-35 mg) in the ITM group compared with 81 mg (67-101 mg) in the EDA group ( $p<0.0001$ ). Simultaneously, there was no significant difference in the overall assessment of pain (NRS) between the groups (Figure 4 and 5). The two groups showed different patterns in the NRS ratings as indicated by the significant interaction effects. The post hoc tests showed that the NRS ratings were significantly higher in the ITM group during the first two days at mobilization, whereas the EDA group scored significantly higher both at rest and at mobilization on day three when the EDA catheter was removed.

The QoL parameters as measured by the EQ-5D, day-by-day, presented no statistically significant difference in health index between the two groups (Figure 6). Neither did the SF-36 show any statistically significant differences in the difference of baseline and 42-days assessments in any of the subscales or summary scores between the groups (Table 3). The role physical and the physical component summary score had not recovered to baseline level in either of the two groups after six weeks whereas the mental health and the mental component summary score showed a significant improvement after six weeks compared with the baseline assessment in the ITM group.

The EDA failed in four women (10%) and ITM analgesia in one (2.5%). These women had either a new EDA in the post-anesthesia care or received patient-controlled morphine iv. One accidental dural puncture occurred in the EDA group. No post-dural puncture headache or

1  
2 anesthesiological adverse effects were observed in either of the groups. The perioperative adverse  
3  
4 events graded according to the Clavien-Dindo classification in the two groups did not differ  
5  
6 significantly ( $p=0.31$ ) as shown in Table 4.  
7  
8  
9  
10  
11  
12  
13  
14  
15  
16  
17  
18  
19  
20  
21  
22  
23  
24  
25  
26  
27  
28  
29  
30  
31  
32  
33  
34  
35  
36  
37  
38  
39  
40  
41  
42  
43  
44  
45  
46  
47  
48  
49  
50  
51  
52  
53  
54  
55  
56  
57  
58  
59  
60

For peer review only

## DISCUSSION

The study showed that a single-dose of intrathecal morphine used as postoperative analgesia compared with epidural analgesia gives advantages in abdominal gynecological cancer surgery in regard to the length of hospital stay, the time to meet the standardized discharge criteria and lower consumption of opioids postoperatively. A substantially higher proportion of women with ITM was discharged on the third postoperative day with an evenly reported health-related QoL and assessment of pain as women with EDA. A key point of an ERAS protocol is simplicity and a single intrathecal injection is simpler than a continuous epidural requiring ongoing management and monitoring. We regard ITM as a quality improvement from the perspective of both the patients and the health care.

The strengths of this trial are the randomized design, the unanimous ERAS and postoperative surveillance of the patients in the gynecological ward, the assessment of pain at rest and during mobilization, and the active use of rescue analgesics on demand. For obvious reasons the interventions could not be blinded for the participants or the staff. This might be a source of bias, but we believe that the potential influence of such bias will be limited and unavoidable in the study design used. A limitation for generalization of the results is the single center design. The ERAS concept is well established in daily clinical work and therefore the results can only be generalized to facilities with similar clinical standards and only to units that manage patients with regional analgesia. The two methods of regional analgesia may not be comparable in giving potentially equivalent analgesia with the dosage and preparation used. However, our objective was to compare the two analgesic methods in a clinical context, not to find the appropriate doses or types of analgesic agent for each method. Therefore, we selected conventional doses of the medications.

The use of intrathecal opioids requires close monitoring of sedation and respiratory rate for 12 hours. The nurses on the gynecological ward were educated regarding complications after ITM with special regard to late respiratory depression and the surveillance followed strict national recommendations. Intrathecal morphine is used in approximately two-thirds of Swedish gynecological units in connection with abdominal hysterectomy having a continued observation on the regular gynecological ward after an initial period of 2-6 hours in a postoperative care unit.[24] The intrathecal morphine dose 0.2 mg was chosen with the purpose of giving adequate analgesia at a risk of respiratory depression that equals systemic opioid analgesia.[25] Following abdominal hysterectomy there is no benefit from increasing the morphine dose over 0.2 mg.[26] The  $\alpha$ -agonist clonidine possesses an anti nociceptive effect from receptors located in the central nervous system. The addition of clonidine to intrathecal opioids further prolongs postoperative analgesia.[10]

The *de facto* duration of hospital stay was shorter in the ITM group. A reduction of hospital stay with one day has clinical relevance for both the patient and the health care system. A similar

1 short length of stay has recently been reported from other ERAS programs for gynecological  
2 cancer.[27-29] Wijk et al.[27] used an analgesic regimen based on oral paracetamol and diclofenac  
3 and over 90% of the patients did not need systemic opioids from the day after surgery. Like our  
4 study, they used standardized discharge criteria. It is important to analyze when discharge criteria  
5 are fulfilled, as they are robust and generalizable. The length of hospital stay is often influenced by  
6 context-specific social factors.  
7  
8  
9  
10  
11

12 In this study, we compared two multimodal analgesic regimens considered clinically relevant.  
13 For that reason, we aimed to make each regimen as optimal as possible. As a consequence, there  
14 were differences in non-opioids as well as opioid regimens until the epidural catheter was removed.  
15 Only rescue opioids were equal for both groups. Thus, the aim was not to compare the intrathecal  
16 and the epidural routes per se.  
17  
18  
19  
20

21 Multimodal analgesic regime minimizing opioid use has been shown to enhance  
22 recovery.[2,30] ITM has become a well-documented component in several ERAS protocols [29,  
23 31-34] and a protocol for a systematic review of ITM in abdominal and thoracic surgery patients  
24 has recently been published.[35] Despite the higher rating of NRS at mobilization during the first  
25 few days in the ITM group the consumption of opioids was nearly three times lower in the same  
26 time period compared with the EDA group, and the QoL index did not differ between the groups.  
27 This may imply that the women in the ITM group were as satisfied as the EDA group with their  
28 pain management, and the difference in NRS rating at mobilization was less clinically significant.  
29 The study included only ASA class I-II patients. For patients with more severe comorbidity the  
30 EDA regimen could be favorable as it offers a better early analgesia that especially patients at risk  
31 for complications could benefit from. A study on abdominal hysterectomy for endometrial cancer  
32 showed that women without EDA ceased opioid analgesia earlier than those women who had an  
33 EDA,[36] indicating a possible overuse of opioids in EDA. An earlier removal of the EDA catheter,  
34 for example after 48 hours, is a possible development of the EDA regimen. Prior to this trial, the  
35 standard praxis in our department was removal of the EDA catheter on the third day. Consequently,  
36 we studied the ITM against this regime. The difference in DDD of non-opioids seen until the third  
37 postoperative day was due to the protocol demand and the clinical routine in the hospital that  
38 diclofenac was not allowed in the EDA group until the EDA catheter was removed. The uneven use  
39 of diclofenac in the groups during the first three postoperative days may be seen as a weakness of  
40 the study. However, the DDD of non-opioids raised from day 1 to day 3 in the EDA group by using  
41 diclofenac in some patients against the study protocol and the clinical routines in the department. It  
42 is therefore less likely that the difference in DDD of non-opioids can explain the significant  
43 difference in opioids. In spite of the addition of diclofenac and consequently an increased DDD on  
44 the third postoperative day, the women in the EDA group rated the NRS at rest and at mobilization  
45  
46  
47  
48  
49  
50  
51  
52  
53  
54  
55  
56  
57  
58  
59  
60

1  
2 higher than the ITM women. Our EDA regimen including complementary analgesics was obviously  
3 not optimal in preventing breakthrough pain in connection with terminating the epidural infusion.  
4 The opioid sparing effect of ITM has been demonstrated in a study analyzing the first 48  
5 postoperative hours.[37] Our study might indicate an even longer benefit.  
6  
7

8  
9 In order to increase the patient-oriented focus on recovery we used two generic QoL forms to  
10 assess the patient-reported outcome of the health status. The EQ-5D was used to determine the  
11 short-term recovery day-by-day, whereas the SF-36 was used for a longer-term assessment. The  
12 short-term recovery in QoL did not seem to differ between the two regimes but at the longer term,  
13 the ITM seemed to give more pronounced advantages than EDA in the recovery of the mental  
14 health. The clinical importance of this remains unclear and merits further exploration. To the best of  
15 our knowledge, there is no condition-specific patient-reported outcome form for our patient group.  
16 Although there is no evidence of content validity for the EQ-5D or SF-36 for the specific patient  
17 group in this study, they are widely used and allow comparisons with population norms. A new  
18 form of the EQ-5D, EQ-5D-5L, has been developed with the aim to better capture smaller health  
19 changes.[38] At the time of the study there was no Swedish value set available for EQ-5D-5L.  
20  
21

22  
23 Severe complications after EDA and ITM are rare but still the indication for the regional  
24 analgesia should always be considered individually. In this trial no severe complications attributed  
25 to the regional analgesia occurred and the adverse events seemed to be equally distributed between  
26 the groups. However, the trial was not powered to detect a statistical difference in adverse events.  
27  
28

29  
30 In conclusion, ITM given in an ERAS program seems to be safe, simple to administer and  
31 effective as postoperative analgesia and gives quality advantages concerning the postoperative  
32 recovery in gynecological abdominal cancer surgery.  
33  
34  
35  
36  
37  
38  
39  
40  
41  
42  
43  
44  
45  
46  
47  
48  
49  
50  
51  
52  
53  
54  
55  
56  
57  
58  
59  
60

## ACKNOWLEDGEMENTS

The research nurses Åsa Rydmark Kersley, Linda Shosholli and Gunilla Gagnö are thanked for their invaluable dedicated work and support during the study.

For peer review only

**REFERENCES**

1. Nygren J, Thacker J, Carli F, et al. Guidelines for perioperative care in elective rectal/pelvic surgery: Enhanced Recovery After Surgery (ERAS®) Society recommendations. *Clin Nutr* 2012;31:801-16.
2. Feldheiser A, Aziz O, Baldini G, et al. Enhanced recovery after surgery (ERAS) for gastrointestinal surgery, part 2: consensus statement for anaesthesia practice. *Acta Anaesthesiol Scand* 2016;60:289–334.
3. Devys JM, Mora A, Plaud B, et al. Intrathecal + PCA morphine improves analgesia during the first 24 hr after major abdominal surgery compared to PCA alone. *Can J Anesth* 2003;50:355-61.
4. Andrieu G, Roth B, Ousmane L, et al. The efficacy of intrathecal morphine with or without clonidine for postoperative analgesia after radical prostatectomy. *Anesth Analg* 2009;108:1954-7.
5. Sakowska M, Docherty E, Linscott D, et al. A change in practice from epidural to intrathecal morphine analgesia for hepato-pancreato-biliary surgery. *World J Surg* 2009;33:1802-8.
6. Bujedo BM, Santos SG, Azpiazu AU. A review of epidural and intrathecal opioids used in the management of postoperative pain. *J Opioid Manag* 2012;8:177-92.
7. Borendal Wodlin N, Nilsson L, Kjølhed P. The impact of mode of anaesthesia on postoperative recovery from fast-track abdominal hysterectomy: a randomised clinical trial. *BJOG* 2011;118:299-308.
8. Kroon U-B, Rådström M, Hjelthe C, et al. Fast-track hysterectomy: A randomised, controlled study. *Eur J Obstet Gynecol Reprod Biol* 2010;151:203-7.
9. Engelman E, Marsala C. Efficacy of adding clonidine to intrathecal morphine in acute postoperative pain: meta-analysis. *Br J Anaesth* 2013;110:21-7.
10. Chopra P, Talwar V. Low dose intrathecal clonidine and fentanyl added to hyperbaric bupivacaine prolongs analgesia in gynecological surgery. *J Anaesthesiol Clin Pharmacol*. 2014;30:233-7.
11. Kara I, Apiliogullari S, Oc B, et al. The effects of intrathecal morphine on patient-controlled analgesia, morphine consumption, postoperative pain and satisfaction scores in patients undergoing gynaecological oncological surgery. *J Int Med Res* 2012;40:666-72.
12. De Pietri L, Siniscalchi A, Reggiani A, et al. The use of intrathecal morphine for postoperative pain relief after liver resection: a comparison with epidural analgesia. *Anesth Analg* 2006;102:1157-63.

13. Koea JB, Young Y, Gunn K. Fast track liver resection: the effect of a comprehensive care package and analgesia with single dose intrathecal morphine with gabapentin or continuous epidural analgesia. *HPB Surgery* 2009;2009:271986.
14. Vercauteren M, Vereecken K, La Malfa M, et al. Cost-effectiveness of analgesia after Caesarean section. A comparison of intrathecal morphine and epidural PCA. *Acta Anaesthesiol Scand* 2002;46:85-9.
15. International Conference on Harmonisation of technical requirements for registration of pharmaceuticals for human use. Good Clinical Practice. Available online at: <http://ichgcp.net/>. (Accessed April 28; 2018).
16. Simple Interactive Statistical Analysis. Allocation. Available online at: <http://www.quantitativeskills.com/sisa/>. (Accessed April 28; 2018).
17. Svensk Förening för Anestesi och Intensivvård. Postoperative analgesia (In Swedish). Available online at: <https://sfai.se/riktlinje/medicinska-rad-och-riktlinjer/anestesi/postoperativ-smartlindring/>. (Accessed April 28; 2018).
18. WHO Collaborating Centre for Drug Statistics Methodology. ATC/DDD Index 2017. Available online at: [https://www.whocc.no/atc\\_ddd\\_index/](https://www.whocc.no/atc_ddd_index/). (Accessed April 28; 2018).
19. Loper K, Ready B, Downey M, et al. Epidural and intravenous fentanyl infusions are clinically equivalent after knee surgery. *Anest Analg* 1990;70:72-5.
20. Caraceni A, Hanks G, Kaasa S, et al. Use of opioid analgesics in the treatment of cancer pain: evidence-based recommendations from the EAPC. *Lancet Oncol* 2012;13:e58-68.
21. Dindo D, Demartines N, Clavien PA. Classification of surgical complications. A new proposal with evaluation in a cohort of 6336 patients and results of a survey. *Ann Surg* 2004;240:206-13.
22. The EuroQol Group. EuroQol – a new facility for the measurement of health-related quality of life. *Health Policy* 1990;16:199-208.
23. Sullivan M, Karlsson J, Ware JE. The Swedish SF-36 Health Survey I. Evaluation of data quality, scaling assumptions, reliability and construct validity across general populations in Sweden. *Soc Sci Med* 1995;41:1349-58.
24. Hein A, Gillis-Haegerstrand C, Jakobsson J. Neuraxial opioids as analgesia in labour, caesarean section and hysterectomy: A questionnaire survey in Sweden. Version 2. *F1000Research* 2017;6:133.
25. Gehling M, Tryba M. Risks and side-effects of intrathecal morphine combined with spinal anaesthesia: a meta-analysis. *Anaesthesia* 2009;64:643-51.



- 1
- 2 26. Hein A, Rösblad P, Gillis-Haegerstrand C, et al. Low dose intrathecal morphine effects on
- 3 post-hysterectomy pain: a randomized placebo-controlled study. *Acta Anesth Scand*
- 4 2012;56:102-9.
- 5
- 6
- 7 27. Wijk L, Franzén K, Ljungqvist O, et al. Enhanced Recovery after Surgery Protocol in
- 8 Abdominal Hysterectomies for Malignant versus Benign Disease. *Gynecol Obstet Invest*
- 9 2016;81:461-7.
- 10
- 11
- 12 28. Carter J. Fast-track surgery in gynaecology and gynaecologic oncology: a review of a rolling
- 13 clinical audit. *ISRN Surg* 2012;2012:368014.
- 14
- 15 29. Dickson EL, Stockwell E, Geller MA, et al. Enhanced recovery program and length of stay
- 16 after laparotomy on a gynecologic oncology service: a randomized controlled trial. *Obstet*
- 17 *Gynecol* 2017;129:355-62.
- 18
- 19
- 20 30. Nelson G, Altman AD, Nick A, et al. Guidelines for postoperative care in
- 21 gynecologic/oncology surgery: Enhanced Recovery After Surgery (ERAS®) Society
- 22 recommendations — Part II. *Gynecol Oncol* 2016;140:323-32.
- 23
- 24 31. Khalil A, Ganesh S, Hughes C, et al. Evaluation of the enhanced recovery after surgery
- 25 protocol in living liver donors. *Clin Transplant*. 2018;32:e13342
- 26
- 27 32. Koning MV, Teunissen AJW, van der Harst E, et al. Intrathecal Morphine for Laparoscopic
- 28 Segmental Colonic Resection as Part of an Enhanced Recovery Protocol: A Randomized
- 29 Controlled Trial. *Reg Anesth Pain Med*. 2018;43:166-173.
- 30
- 31 33. Helander EM, Webb MP, Bias M, et al. Use of Regional Anesthesia Techniques: Analysis of
- 32 Institutional Enhanced Recovery After Surgery Protocols for Colorectal Surgery. *J*
- 33 *Laparoendosc Adv Surg Tech A*. 2017 ;27:898-902.
- 34
- 35 34. Virlos I, Clements D, Beynon J, et al. Short-term outcomes with intrathecal versus epidural
- 36 analgesia in laparoscopic colorectal surgery. *Br J Surg*. 2010 ;97:1401-6.
- 37
- 38 35. Pitre L, Garbee D, Tipton J, et al. Effects of preoperative intrathecal morphine on
- 39 postoperative intravenous morphine dosage: a systematic review protocol. *JBI Database*
- 40 *System Rev Implement Rep*. 2018;16:867-870.
- 41
- 42 36. Belavy D, Janda M, Baker J, et al. Epidural analgesia is associated with an increased
- 43 incidence of postoperative complications in patients requiring an abdominal hysterectomy for
- 44 early stage endometrial cancer. *Gynecol Oncol* 2013;131:423–9.
- 45
- 46 37. Massicotte L, Chalaou KD, Beaulieu D, et al. Comparison of spinal anesthesia with general
- 47 anesthesia on morphine requirement after abdominal hysterectomy. *Acta Anaesthesiol Scand*
- 48 2009;53:641-647
- 49
- 50 38. Devlin NJ, Shah KK, Feng Y, et al. Valuing health-related quality of life: An EQ-5D-5L
- 51 value set for England. *Health Economics*. 2018; 27:7-22.
- 52
- 53
- 54
- 55
- 56
- 57
- 58
- 59
- 60

## FIGURE LEGENDS

- 1  
2  
3  
4 Figure 1. CONSORT flow chart of participants in the study. EDA, epidural analgesia. ITM,  
5 intrathecal morphine analgesia.  
6  
7 Figure 2 and 3. Consumption of analgesics after surgery in relation to occasion of measurement.  
8  
9 Plots represent means and bars represent 95% confidence interval. Results of the  
10 repeated measures ANOVA and post hoc tests from Day 0 to the Day 6  
11 assessment for equivalent morphine given and from Day 0 to Day 42 for DDD  
12 non-opioids are presented in the table below the diagrams. DDD = defined daily  
13 dose; EDA = epidural analgesia; ITM = intrathecal morphine analgesia.  
14  
15  
16  
17  
18 Figure 4 and 5. Assessment of pain by means of a 10 graded numeric rating scale (NRS) at rest  
19 and at mobilization. Plots represent means and bars represent 95% confidence  
20 interval. Results of the repeated measures ANOVA and post hoc tests from Day 0  
21 to the Day 6 are shown in the table below the diagrams. Assessments done from  
22 the evening of surgery and three times daily. Day 1.1, 1.2 and 1.3, respectively,  
23 represent the measurements performed in the morning, the afternoon and the  
24 evening on Day 1. EDA = epidural analgesia; ITM = intrathecal morphine  
25 analgesia.  
26  
27  
28  
29  
30  
31  
32  
33 Figure 6. Illustration of EQ-5D weighted health state index in relation to occasion of  
34 measurement. Plots represent means and bars represent 95% confidence interval.  
35 Result of the repeated measures ANOVA and post hoc tests from Day 0 - 42  
36 assessment is presented. EDA = epidural analgesia; ITM = intrathecal morphine  
37 analgesia. No significant differences were observed in the EQ-5D health index  
38 between the two groups preoperatively.  
39  
40  
41  
42  
43  
44  
45  
46  
47  
48  
49  
50  
51  
52  
53  
54  
55  
56  
57  
58  
59  
60

1  
2  
3  
4  
5  
6  
7  
8  
9  
10  
11  
12  
13  
14  
15  
16  
17  
18  
19  
20  
21  
22  
23  
24  
25  
26  
27  
28  
29  
30  
31  
32  
33  
34  
35  
36  
37  
38  
39  
40  
41  
42  
43  
44  
45  
46  
47  
48  
49  
50  
51  
52  
53  
54  
55  
56  
57  
58  
59  
60**AUTHOR STATEMENT****AUTHOR'S CONTRIBUTION**

PK, NBW and LN designed and conducted the study. PK performed the statistically analyses. PK, OB, NBW and LN undertook the initial interpretation of the data, which was followed by discussions with all the authors. PK, OB and LN drafted the initial version of the manuscript, followed by a critical revision process for intellectual content involving all authors. All authors agreed to the final version of the manuscript before submission. All authors agree to be accountable for the accuracy of any part of the work.

For peer review only

Table 1. Descriptive and demographic data of the study population.

|                                       | EDA group<br>n = 40 | ITM group<br>n = 40 |
|---------------------------------------|---------------------|---------------------|
| Age (years)                           | 59.0 (51.5-66.0)    | 58.5 (54.0-62.5)    |
| < 50 years                            | 7 (17.5%)           | 6 (15%)             |
| 50 – 60 years                         | 16 (40%)            | 20 (50%)            |
| > 60 years                            | 17 (42.5%)          | 14 (35%)            |
| Body mass index (kg/m <sup>2</sup> )  | 28.5 (24.7-31.2)    | 27.8 (23.4-31.2)    |
| BMI < 25 kg/m <sup>2</sup>            | 11 (27.5%)          | 13 (32.5%)          |
| BMI 25-29.9 kg/m <sup>2</sup>         | 15 (37.5%)          | 15 (37.5%)          |
| BMI 30-34.9 kg/m <sup>2</sup>         | 9 (22.5%)           | 7 (17.5%)           |
| BMI ≥ 35 kg/m <sup>2</sup>            | 5 (12.5%)           | 5 (12.5%)           |
| Parity                                | 2.0 (0-5)           | 2.0 (0-4)           |
| Smokers                               | 5 (12.5%)           | 4 (10%)             |
| Previous laparotomy                   | 17 (42.5%)          | 17 (42.5%)          |
| ASA classification                    |                     |                     |
| Class I                               | 15 (37.5%)          | 15 (37.5%)          |
| Class II                              | 25 (62.5%)          | 25 (62.5%)          |
| Comorbidity                           |                     |                     |
| Diabetes mellitus                     | 4 (10%)             | 4 (10%)             |
| Cardiovascular disease                | 13 (32.5%)          | 12 (30%)            |
| Pulmonary disease                     | 4 (10%)             | 5 (12.5%)           |
| Mild psychiatric disease              | 6 (12.5%)           | 4 (10%)             |
| Previous malignancy                   | 4 (10%)             | 2 (5%)              |
| Current medication                    |                     |                     |
| Antidepressant/sedative               | 8 (20%)             | 7 (17.5%)           |
| Analgesics                            | 7 (17.5%)           | 12 (30%)            |
| Indication for surgery                |                     |                     |
| Proven/assumed gynecologic malignancy | 16/24 (40%/60%)     | 18/22 (45%/55%)     |

Figures denote median and (inter quartile range) or number and (percent).

ASA, American Society of Anesthesiologists risk classification; BMI, body mass index. EDA, epidural analgesia. ITM, intrathecal morphine analgesia

Table 2. Clinical surgical and anesthesiological data.

|                                                                   | EDA group<br>n = 40 | ITM group<br>n = 40 | p-value*          |
|-------------------------------------------------------------------|---------------------|---------------------|-------------------|
| Operation time (minutes)                                          | 116 (80-151.5)      | 139 (99.5-169)      | 0.10              |
| Estimated per-operative blood loss (ml)                           | 100 (50-275)        | 200 (50-250)        | 0.28              |
| Extent of skin incision from superior edge of symphysis pubis to: |                     |                     |                   |
| - umbilicus                                                       | 6 (15%)             | 2 (5%)              |                   |
| - between umbilicus and PX                                        | 17 (42.5%)          | 21 (52.5%)          | 0.30              |
| - PX                                                              | 17 (42.5%)          | 17 (42.5%)          |                   |
| Extent of surgery (no. of women)                                  |                     |                     |                   |
| - Category I                                                      | 1 (2.5%)            | 1 (2.5%)            |                   |
| - Category II                                                     | 8 (20%)             | 2 (5%)              |                   |
| - Category III                                                    | 17 (42.5%)          | 18 (45%)            | 0.25              |
| - Category IV                                                     | 8 (20%)             | 14 (35%)            |                   |
| - Category V                                                      | 6 (15%)             | 5 (12.5%)           |                   |
| Tumor status at end of surgery <sup>†</sup> (no. of women):       |                     |                     |                   |
| - Macroscopically radical                                         | 17 (63%)            | 25 (76%)            |                   |
| - Minimal disease                                                 | 3 (11%)             | 5 (15%)             | 0.22              |
| - Bulky disease                                                   | 7 (26%)             | 3 (9%)              |                   |
| Histopathological diagnosis: malignant/benign                     | 27/13 (67.5/32.5%)  | 33/7 (82.5/17.5%)   | 0.12              |
| - Ovarian/fallopian tube/peritoneal cancer                        | 13 (32.5%)          | 18 (45%)            |                   |
| - Ovarian borderline cancer                                       | 5 (12.5%)           | 0 (0%)              |                   |
| - Uterus carcinoma or sarcoma                                     | 7 (17.5%)           | 13 (32.5%)          |                   |
| - Cervical cancer                                                 | 1 (2.5%)            | 0 (0%)              |                   |
| - Appendix or sigmoideum cancer                                   | 1 (2.5%)            | 2 (5%)              |                   |
| - Benign ovarian or uterine tumor                                 | 13 (32.5%)          | 7 (17.5%)           |                   |
| CAD at discharge (no. of women)                                   | 3 (7.7%)            | 4 (10.3%)           | 0.45 <sup>†</sup> |
| Premedication                                                     |                     |                     |                   |
| Paracetamol (DDD)                                                 | 0.67 (0.44-0.67)    | 0.67 (0.67-0.67)    | 0.99              |
| Morphine <sup>§</sup> (mg)                                        | 0 (0-0.75)          | 0 (0-0)             | 0.30              |
| Antiemetic, medication (no. of women)                             | 16 (57%)            | 12 (43%)            | 0.35              |
| Antiemetic, Acupressure band (no. of women)                       | 22 (47%)            | 25 (53%)            | 0.50              |
| Anesthetic drugs:                                                 |                     |                     |                   |
| Propofol (mg)                                                     | 200 (160-240)       | 200 (160-260)       | 0.62              |
| Rokuroniumbromid (mg)                                             | 50 (40-60)          | 50 (40-62.5)        | 0.32              |
| Equivalent morphine dose (mg)                                     | 30.5 (27.3-41.3)    | 45.0 (40.0-50.0)    | <0.0001           |
| Paracetamol (mg)                                                  | 0 (0-0)             | 0 (0-0)             | 0.99              |
| Vasoactive treatment during anesthesia                            |                     |                     |                   |
| Ephedrine (mg)                                                    | 20 (7.5-25)         | 20 (15-25)          | 0.79              |
| Phenylephrine (µg)                                                | 0 (0-1062)          | 0 (0-1440)          | 0.50              |
| Norepinephrine (µg)                                               | 0 (0-21)            | 0 (0-130)           | 0.57              |
| Atropine (mg)                                                     | 0 (0-0)             | 0 (0-0.5)           | 0.24              |
| Anesthesia time (minutes)                                         | 177.5 (142.5-202.5) | 200 (155-240)       | 0.08              |
| Lowest body temperature during surgery (°C)                       | 35.7 (35.5-36.1)    | 35.6 (35.4-35.9)    | 0.16              |
| Body temperature at end of surgery (°C)                           | 36.1 (35.9-36.4)    | 36.1 (35.7-36.3)    | 0.68              |
| Time in PACU (hours)                                              | 4.6 (4.2-5.6)       | 5.7 (4.0-8.1)       | 0.09              |

Figures denote number and (percent) or median and (inter quartile range).

CAD, transurethral or supra pubic indwelling catheter. DDD, defined daily dose. EDA, epidural analgesia. ITM, intrathecal morphine analgesia. PACU, post anesthesia care unit. PX, processus xiphoideus.

1  
2 Categories of extent of surgery: Category I, diagnostic surgery; Category II, resection of  
3 gynecologic organs only; Category III, resection of gynecologic organs, omentectomy and ±  
4 appendectomy; Category IV, as Category III + pelvic and/or paraaortic lymphadenectomy;  
5 Category V, as Category III ± pelvic and/or paraaortic lymphadenectomy + resection of abdominal  
6 visceral organs.  
7

8 \*Mann-Whitney U-test applied for continuous data and  $\chi^2$ - test (df 1-4) or †Fisher's exact test for  
9 categorical data. ‡ in women with malignant disease. § Equivalent dose morphine intravenously  
10  
11  
12  
13  
14  
15  
16  
17  
18  
19  
20  
21  
22  
23  
24  
25  
26  
27  
28  
29  
30  
31  
32  
33  
34  
35  
36  
37  
38  
39  
40  
41  
42  
43  
44  
45  
46  
47  
48  
49  
50  
51  
52  
53  
54  
55  
56  
57  
58  
59  
60

For peer review only

Table 3. SF-36 subscales and summary scores. A high score represents a better health-related quality of life

| SF-36 subscales                  | Time lapse  |             |            |              | EDA    | Day 42 - Baseline |      |             |
|----------------------------------|-------------|-------------|------------|--------------|--------|-------------------|------|-------------|
|                                  | Baseline    |             | Day 42     |              |        | p-value *         | ITM  | EDA vs. ITM |
|                                  | EDA         | ITM         | EDA        | ITM          |        |                   |      |             |
| Physical functioning             | 85 (63-95)  | 80 (65-95)  | 80 (65-95) | 83 (68-90)   | 0.91   | 0.95              | 0.69 |             |
| Role physical                    | 38 (0-100)  | 63 (0-100)  | 0 (0-13)   | 0 (0-0)      | <0.001 | <0.0001           | 0.16 |             |
| Bodily pain                      | 51 (37-100) | 62 (47-84)  | 58 (42-74) | 74 (52-84)   | 0.96   | 0.92              | 0.95 |             |
| General health                   | 75 (57-85)  | 72 (55-81)  | 70 (47-87) | 72 (59-81)   | 0.10   | 0.65              | 0.10 |             |
| Vitality                         | 53 (40-75)  | 53 (43-70)  | 45 (33-68) | 55 (43-70)   | 0.08   | 0.90              | 0.20 |             |
| Social functioning               | 75 (50-100) | 75 (56-81)  | 75 (50-88) | 75 (50-75)   | 0.15   | 0.70              | 0.09 |             |
| Role emotional                   | 100 (0-100) | 100 (0-100) | 83 (0-100) | 100 (33-100) | 0.65   | 0.25              | 0.30 |             |
| Mental health                    | 76 (60-84)  | 70 (60-80)  | 78 (66-84) | 80 (66-86)   | 0.54   | <0.01             | 0.13 |             |
| Physical component summary score | 44 (34-53)  | 45 (34-53)  | 39 (34-44) | 38 (35-42)   | 0.03   | <0.01             | 0.41 |             |
| Mental component summary score   | 46 (35-52)  | 46 (35-51)  | 49 (34-53) | 51 (39-55)   | 0.69   | 0.01              | 0.05 |             |

Figures indicate median (inter quartile range). EDA = epidural analgesia. ITM = intrathecal morphine analgesia.

\* Wilcoxon matched pair tests. \*\* Mann-Whitney U test.

No significant differences were observed in the subscales between the two groups at baseline (Mann-Whitney U-test).

Table 4. The Clavien-Dindo classification of adverse events (contracted form) within the study period of six weeks.

|                  | EDA group<br>(n=40) | ITM group<br>(n=40) |
|------------------|---------------------|---------------------|
| No complications | 19 (47.5)           | 19 (47.5)           |
| Grade I          | 13 (32.5)           | 8 (20.0)            |
| Grade II         | 6 (15.0)            | 6 (15.0)            |
| Grade III        | 1 (2.5)             | 6 (15.0)            |
| Grade IV         | 1 (2.5)             | 1 (2.5)             |

Figures denote number and (percent).

EDA = epidural analgesia. ITM = intrathecal morphine analgesia.  $p=0.31$ ;  $\chi^2$  for trends (df=4).

Grade I: Any deviation from the normal postoperative course without the need for pharmacological treatment or surgical, endoscopic and radiological interventions. Allowed therapeutic regimens are: drugs as antiemetics, antipyretics, analgetics, diuretics and electrolytes and physiotherapy. This grade also includes wound infections opened at the bedside.

Grade II: Requiring pharmacological treatment with drugs other than such allowed for grade I complications. Blood transfusions and total parenteral nutrition are also included.

Grade III: Requiring surgical, endoscopic or radiological intervention

Grade IV: Life-threatening complication requiring intermediate care/intensive care unit management



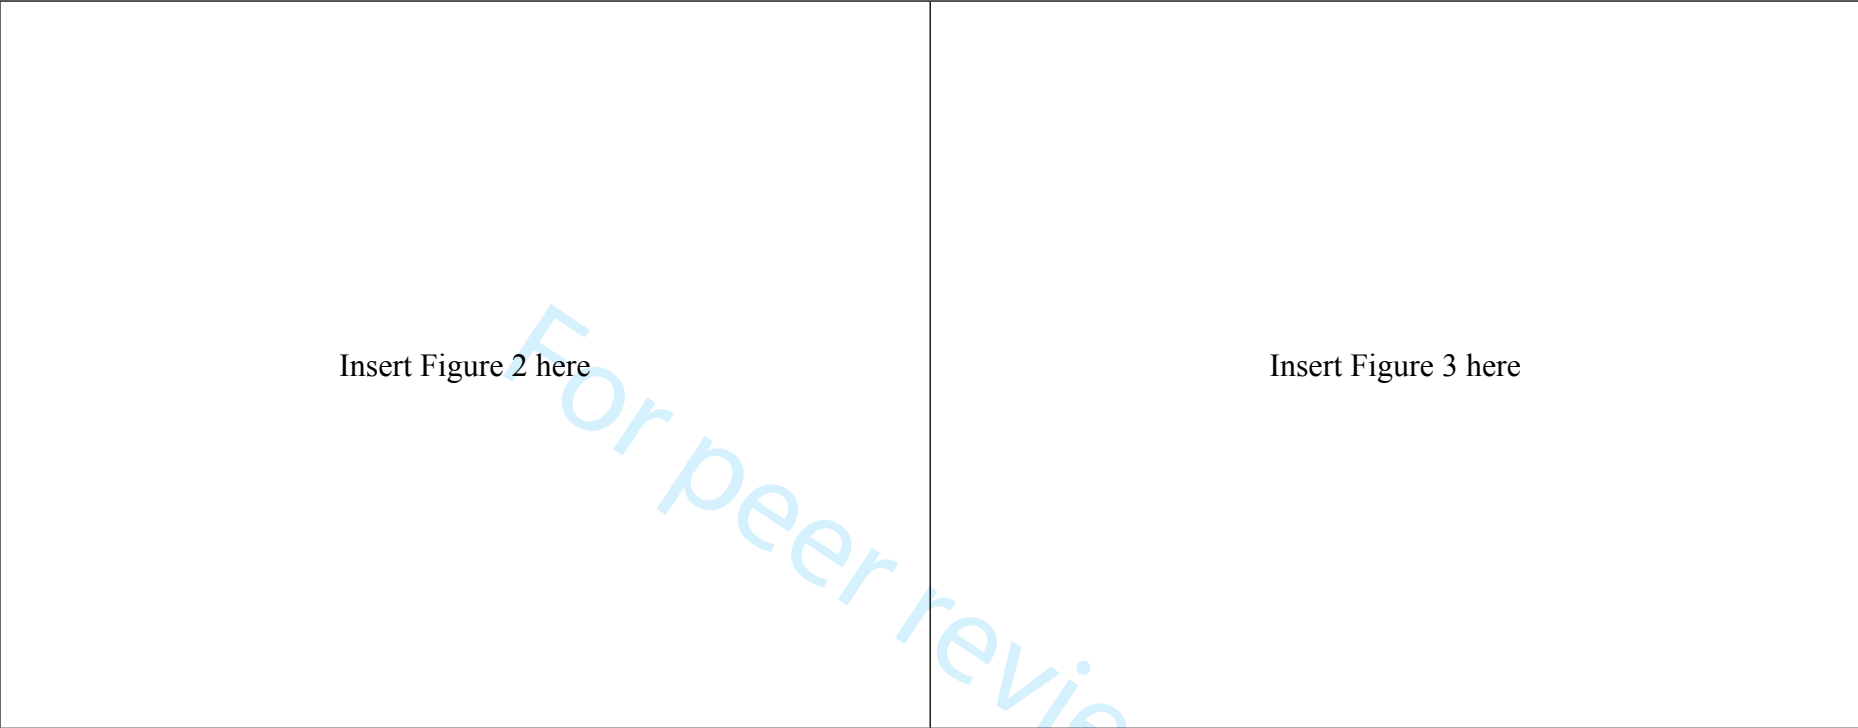

|                                    | Repeated measures ANOVA    |  |                       |  |  |                    |  |
|------------------------------------|----------------------------|--|-----------------------|--|--|--------------------|--|
|                                    | Main effect between groups |  | Main effect over time |  |  | Interaction effect |  |
| Opioids (Equivalent morphine (mg)) | $p < 0.001$                |  | $p < 0.0001$          |  |  | $p < 0.0001$       |  |
| DDD non-opioids                    | $p = 0.75$                 |  | $p < 0.0001$          |  |  | $p < 0.0001$       |  |

  

|         | Bonferroni post hoc tests, (p-value) |         |        |       |       |       |       |
|---------|--------------------------------------|---------|--------|-------|-------|-------|-------|
|         | Day 0                                | Day 1   | Day 2  | Day 3 | Day 4 | Day 5 | Day 6 |
| Opioids | <0.0001                              | <0.0001 | <0.001 | 1.00  | 1.00  | 1.00  | 1.00  |

Figure 2 and 3. Consumption of analgesics after surgery in relation to occasion of measurement. Plots represent means and bars represent 95% confidence interval. Results of the repeated measures ANOVA and post hoc tests from Day 0 to the Day 6 assessment for equivalent morphine given are presented in the table below the diagram. DDD = defined daily dose; EDA = epidural analgesia; ITM = intrathecal morphine analgesia.

1  
2  
3  
4  
5  
6  
7  
8  
9  
10  
11  
12  
13  
14  
15  
16  
17  
18  
19  
20  
21  
22  
23  
24  
25  
26  
27  
28  
29  
30  
31  
32  
33  
34  
35  
36  
37  
38  
39  
40  
41  
42  
43  
44  
45  
46

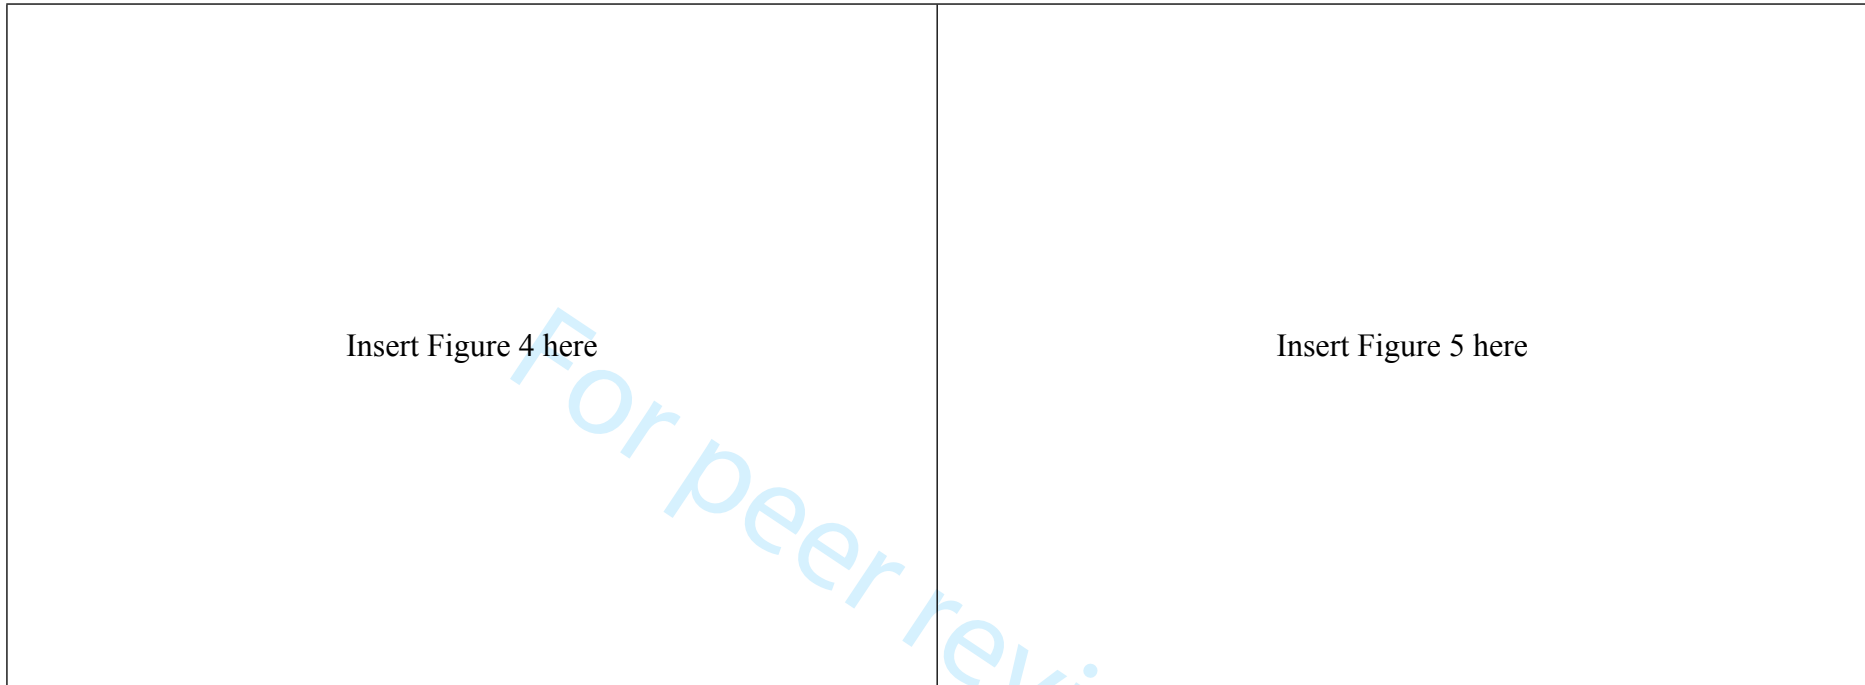

|                     |  | Repeated measures ANOVA    |                       |                    |
|---------------------|--|----------------------------|-----------------------|--------------------|
|                     |  | Main effect between groups | Main effect over time | Interaction effect |
| NRS at rest         |  | $p = 0.34$                 | $p < 0.001$           | $p < 0.0001$       |
| NRS at mobilization |  | $p = 0.08$                 | $p < 0.0001$          | $p < 0.0001$       |

  

|                     |  | Bonferroni post hoc tests, (p-value) |         |         |         |         |         |         |         |         |         |         |         |         |         |         |         |         |         |         |
|---------------------|--|--------------------------------------|---------|---------|---------|---------|---------|---------|---------|---------|---------|---------|---------|---------|---------|---------|---------|---------|---------|---------|
|                     |  | Day 0.3                              | Day 1.1 | Day 1.2 | Day 1.3 | Day 2.1 | Day 2.2 | Day 2.3 | Day 3.1 | Day 3.2 | Day 3.3 | Day 4.1 | Day 4.2 | Day 4.3 | Day 5.1 | Day 5.2 | Day 5.3 | Day 6.1 | Day 6.2 | Day 6.3 |
| NRS at mobilization |  | 0.01                                 | 0.06    | 0.01    | 0.44    | 1.00    | 1.00    | 1.00    | 1.00    | 1.00    | 1.00    | 1.00    | 1.00    | 1.00    | 1.00    | 1.00    | 1.00    | 1.00    | 1.00    | 1.00    |

Figure 4 and 5. Assessment of pain by means of a 10 graded numeric rating scale (NRS) at rest and at mobilization. Plots represent means and bars represent 95% confidence interval. Results of the repeated measures ANOVA and post hoc tests from Day 0 to the Day 6 are shown in the table below the diagrams. Assessments done from the evening of surgery and three times daily. Day 1.1, 1.2 and 1.3, respectively, represent the measurements performed in the morning, the afternoon and the evening on Day 1. EDA = epidural analgesia; ITM = intrathecal morphine analgesia.

1  
2  
3  
4  
5  
6  
7  
8  
9  
10  
11  
12  
13  
14  
15  
16  
17  
18  
19  
20  
21  
22  
23  
24  
25  
26  
27  
28  
29  
30  
31  
32  
33  
34  
35  
36  
37  
38  
39  
40  
41  
42  
43  
44  
45  
46  
47  
48  
49  
50  
51  
52  
53  
54  
55  
56  
57  
58  
59  
60

Insert Figure 6 here

| Repeated measures ANOVA    |                       |                    |
|----------------------------|-----------------------|--------------------|
| Main effect between groups | Main effect over time | Interaction effect |
| $p = 0.22$                 | $p < 0.0001$          | $p = 0.33$         |

Figure 6. Illustration of EQ-5D weighted health state index in relation to occasion of measurement. Plots represent means and bars represent 95% confidence interval. Result of the repeated measures ANOVA from Day 0 - 42 assessment is presented. EDA = epidural analgesia; ITM = intrathecal morphine analgesia. No significant differences were observed in the EQ-5D health index between the two groups preoperatively.

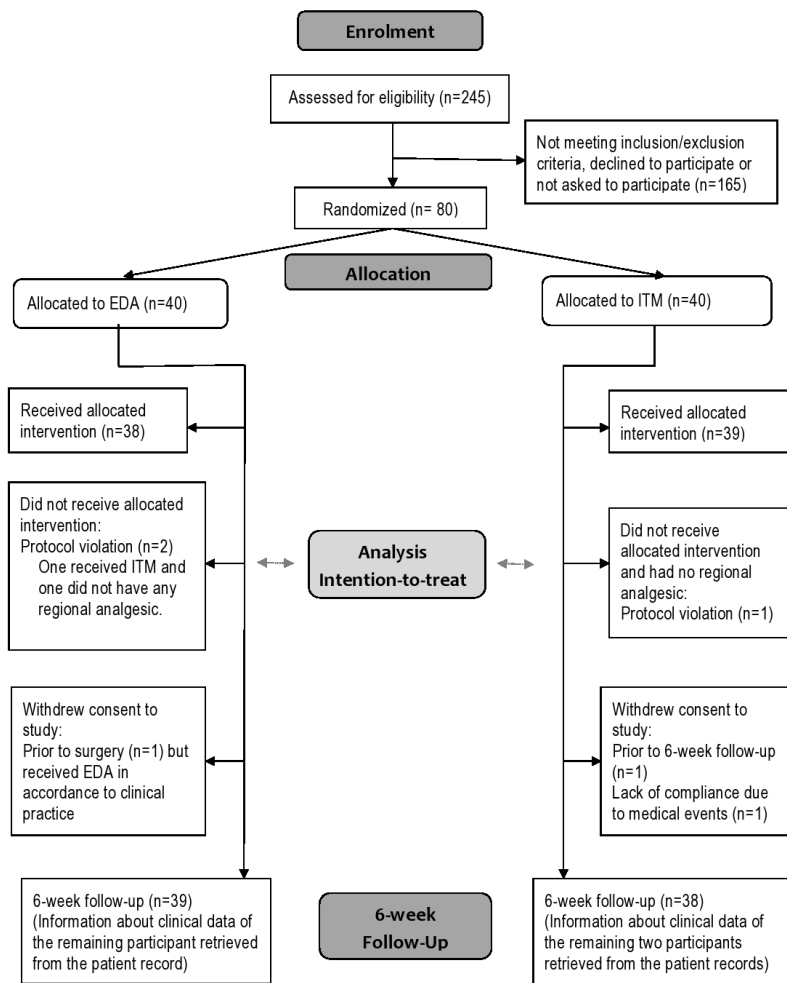

Figure 1.

Figure 1

449x582mm (72 x 72 DPI)

1  
2  
3  
4  
5  
6  
7  
8  
9  
10  
11  
12  
13  
14  
15  
16  
17  
18  
19  
20  
21  
22  
23  
24  
25  
26  
27  
28  
29  
30  
31  
32  
33  
34  
35  
36  
37  
38  
39  
40  
41  
42  
43  
44  
45  
46  
47  
48  
49  
50  
51  
52  
53  
54  
55  
56  
57  
58  
59  
60

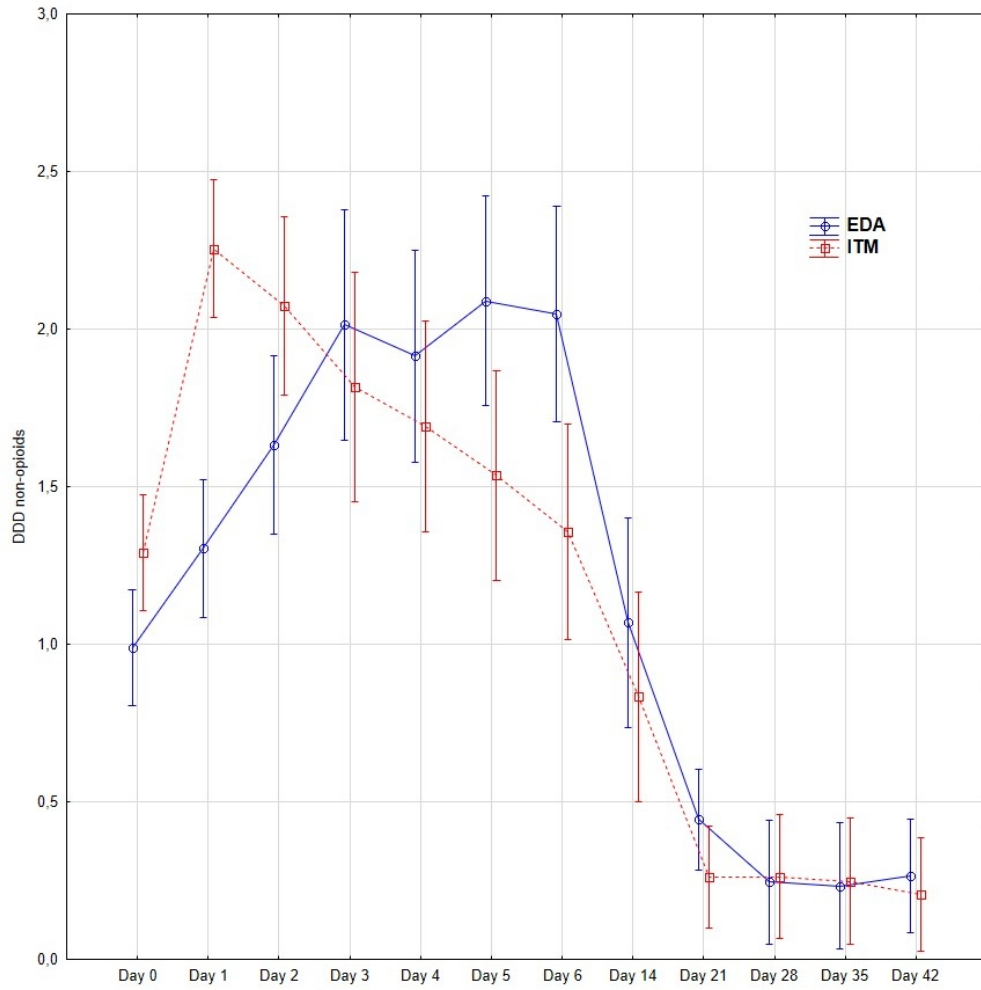

Figure 2 and 3

228x228mm (96 x 96 DPI)

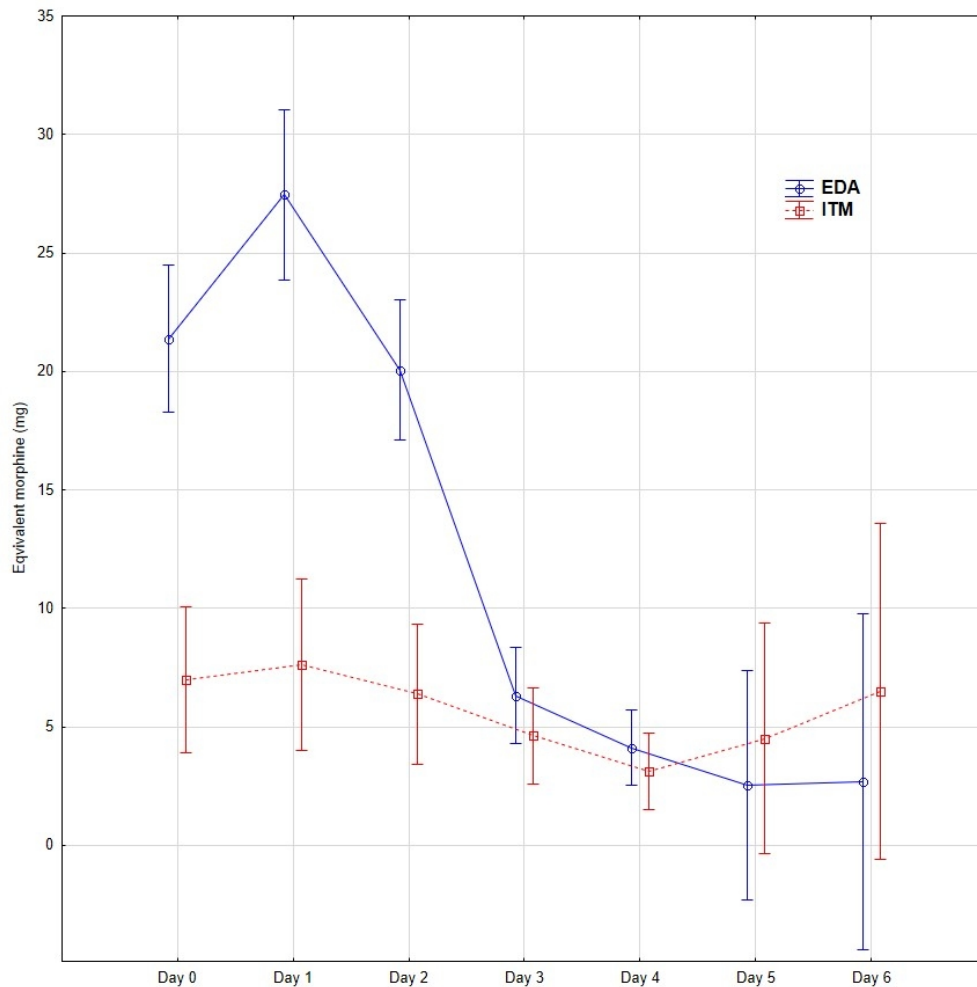

Figure 2 and 3

228x228mm (96 x 96 DPI)

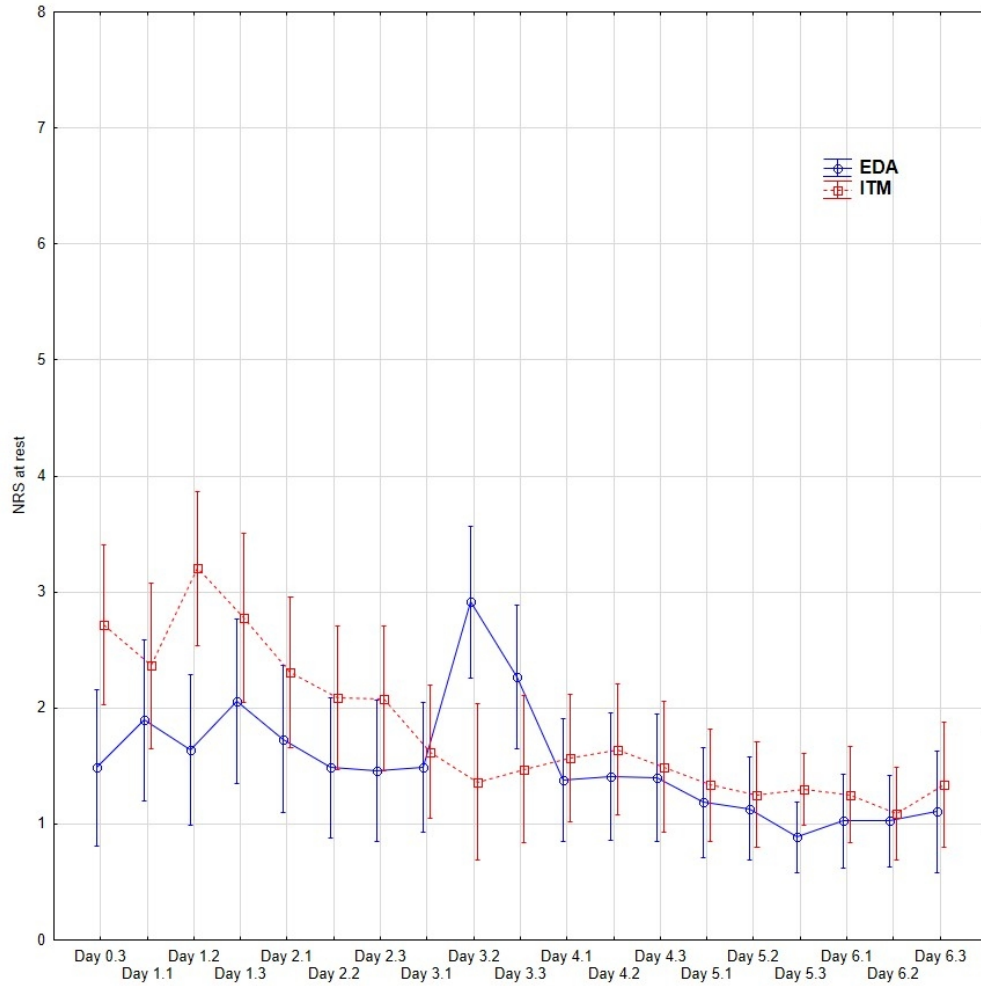

Figure 4 and 5

228x228mm (96 x 96 DPI)

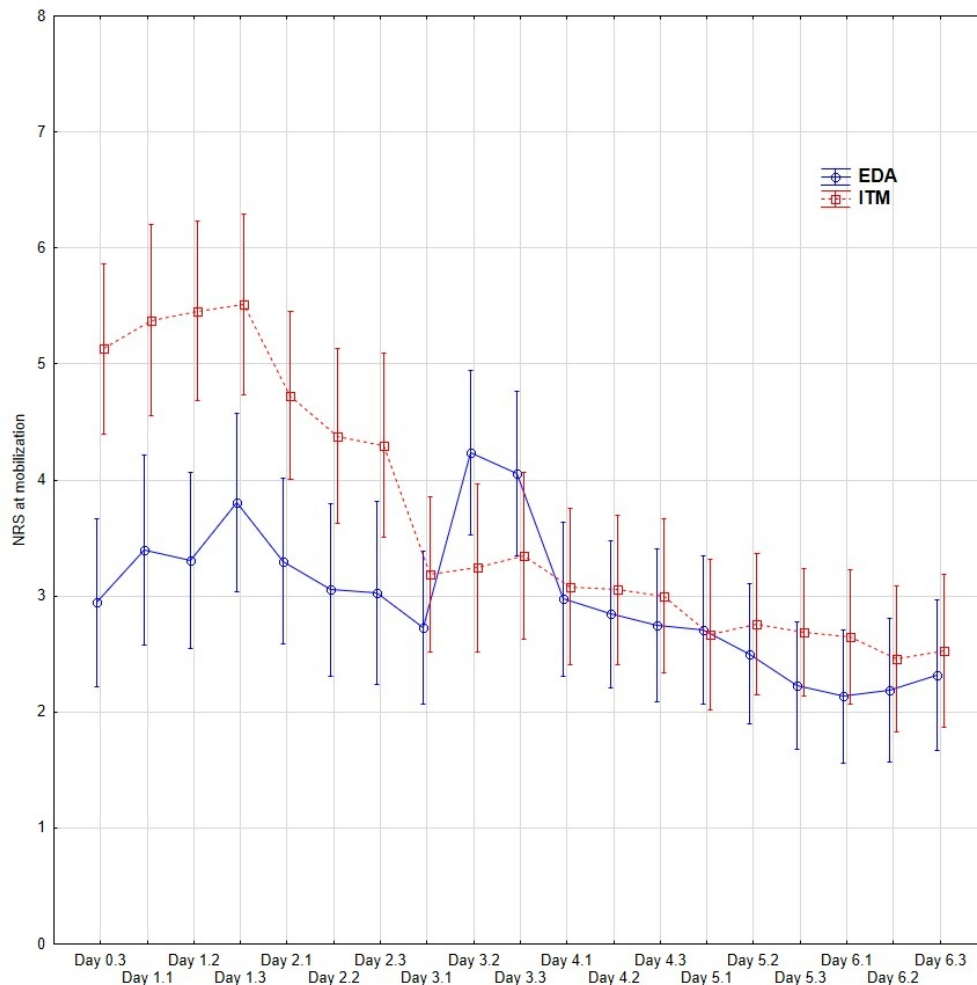

Figure 4 and 5

228x228mm (96 x 96 DPI)



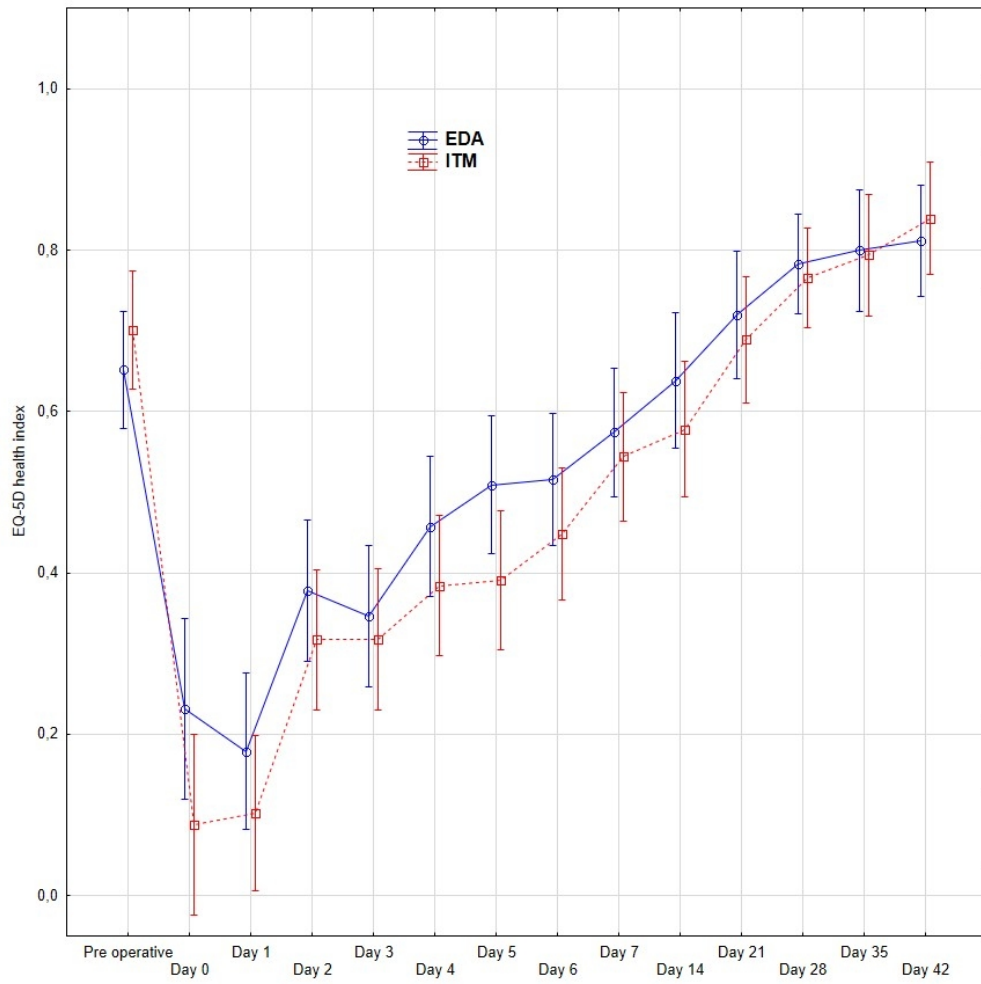

Figure 6

228x228mm (96 x 96 DPI)

# Reporting checklist for randomized trial.

Based on the CONSORT guidelines.

## Instructions to authors

Complete this checklist by entering the page numbers from your manuscript where readers will find each of the items listed below.

Your article may not currently address all the items on the checklist. Please modify your text to include the missing information. If you are certain that an item does not apply, please write "n/a" and provide a short explanation.

Upload your completed checklist as an extra file when you submit to a journal.

In your methods section, say that you used the CONSORT reporting guidelines, and cite them as:

Schulz KF, Altman DG, Moher D, for the CONSORT Group. CONSORT 2010 Statement: updated guidelines for reporting parallel group randomised trials

|                           |                     | Reporting Item                                                                                                    | Page Number |
|---------------------------|---------------------|-------------------------------------------------------------------------------------------------------------------|-------------|
| Title                     | <a href="#">#1a</a> | Identification as a randomized trial in the title.                                                                | 1           |
| Abstract                  | <a href="#">#1b</a> | Structured summary of trial design, methods, results, and conclusions                                             | 2           |
| Background and objectives | <a href="#">#2a</a> | Scientific background and explanation of rationale                                                                | 4           |
|                           | <a href="#">#2b</a> | Specific objectives or hypothesis                                                                                 | 4           |
| Trial design              | <a href="#">#3a</a> | Description of trial design (such as parallel, factorial) including allocation ratio.                             | 5           |
|                           | <a href="#">#3b</a> | Important changes to methods after trial commencement (such as eligibility criteria), with reasons                | Na          |
| Participants              | <a href="#">#4a</a> | Eligibility criteria for participants                                                                             | 5           |
|                           | <a href="#">#4b</a> | Settings and locations where the data were collected                                                              | 5           |
| Interventions             | <a href="#">#5</a>  | The experimental and control interventions for each group with sufficient details to allow replication, including | 5-6         |

|    |                        |                                                                                  |          |
|----|------------------------|----------------------------------------------------------------------------------|----------|
|    |                        | how and when they were actually administered                                     |          |
| 1  |                        |                                                                                  |          |
| 2  | Outcomes               | <a href="#">#6a</a> Completely defined prespecified primary and secondary        | 4-6      |
| 3  |                        | outcome measures, including how and when they were                               |          |
| 4  |                        | assessed                                                                         |          |
| 5  |                        |                                                                                  |          |
| 6  |                        |                                                                                  |          |
| 7  | Sample size            | <a href="#">#7a</a> How sample size was determined.                              | 7        |
| 8  |                        |                                                                                  |          |
| 9  |                        |                                                                                  |          |
| 10 |                        | <a href="#">#7b</a> When applicable, explanation of any interim analyses         | NA       |
| 11 |                        | and stopping guidelines                                                          |          |
| 12 |                        |                                                                                  |          |
| 13 | Randomization -        | <a href="#">#8a</a> Method used to generate the random allocation                | 5        |
| 14 | Sequence generation    | sequence.                                                                        |          |
| 15 |                        |                                                                                  |          |
| 16 |                        | <a href="#">#8b</a> Type of randomization; details of any restriction (such as   | 5        |
| 17 |                        | blocking and block size)                                                         |          |
| 18 |                        |                                                                                  |          |
| 19 | Randomization -        | <a href="#">#9</a> Mechanism used to implement the random allocation             | 5        |
| 20 | Allocation concealment | sequence (such as sequentially numbered containers),                             |          |
| 21 | mechanism              | describing any steps taken to conceal the sequence until                         |          |
| 22 |                        | interventions were assigned                                                      |          |
| 23 |                        |                                                                                  |          |
| 24 | Randomization -        | <a href="#">#10</a> Who generated the allocation sequence, who enrolled          | 5        |
| 25 | Implementation         | participants, and who assigned participants to                                   |          |
| 26 |                        | interventions                                                                    |          |
| 27 |                        |                                                                                  |          |
| 28 | Blinding               | <a href="#">#11a</a> If done, who was blinded after assignment to                | NA       |
| 29 |                        | interventions (for example, participants, care providers,                        |          |
| 30 |                        | those assessing outcomes) and how.                                               |          |
| 31 |                        |                                                                                  |          |
| 32 |                        | <a href="#">#11b</a> If relevant, description of the similarity of interventions | NA       |
| 33 |                        |                                                                                  |          |
| 34 | Statistical methods    | <a href="#">#12a</a> Statistical methods used to compare groups for primary      | 9        |
| 35 |                        | and secondary outcomes                                                           |          |
| 36 |                        |                                                                                  |          |
| 37 |                        | <a href="#">#12b</a> Methods for additional analyses, such as subgroup           | 9        |
| 38 |                        | analyses and adjusted analyses                                                   |          |
| 39 |                        |                                                                                  |          |
| 40 | Participant flow       | <a href="#">#13a</a> A diagram is strongly recommended. For each group,          | Figure 1 |
| 41 | diagram (strongly      | the numbers of participants who were randomly                                    |          |
| 42 | recommended)           | assigned, received intended treatment, and were                                  |          |
| 43 |                        | analysed for the primary outcome                                                 |          |
| 44 |                        |                                                                                  |          |
| 45 | Participant flow       | <a href="#">#13b</a> For each group, losses and exclusions after                 | Figure 1 |
| 46 |                        | randomization, together with reason                                              |          |
| 47 |                        |                                                                                  |          |
| 48 |                        |                                                                                  |          |
| 49 |                        |                                                                                  |          |
| 50 |                        |                                                                                  |          |
| 51 |                        |                                                                                  |          |
| 52 |                        |                                                                                  |          |
| 53 |                        |                                                                                  |          |
| 54 |                        |                                                                                  |          |
| 55 |                        |                                                                                  |          |
| 56 |                        |                                                                                  |          |
| 57 |                        |                                                                                  |          |
| 58 |                        |                                                                                  |          |
| 59 |                        |                                                                                  |          |
| 60 |                        |                                                                                  |          |

|    |                         |                      |                                                                                                                                                   |                 |
|----|-------------------------|----------------------|---------------------------------------------------------------------------------------------------------------------------------------------------|-----------------|
| 1  | Recruitment             | <a href="#">#14a</a> | Dates defining the periods of recruitment and follow-up                                                                                           | 5               |
| 2  |                         |                      |                                                                                                                                                   |                 |
| 3  |                         | <a href="#">#14b</a> | Why the trial ended or was stopped                                                                                                                | NA              |
| 4  |                         |                      |                                                                                                                                                   |                 |
| 5  | Baseline data           | <a href="#">#15</a>  | A table showing baseline demographic and clinical characteristics for each group                                                                  | Table 1         |
| 6  |                         |                      |                                                                                                                                                   |                 |
| 7  |                         |                      |                                                                                                                                                   |                 |
| 8  |                         |                      |                                                                                                                                                   |                 |
| 9  | Numbers analysed        | <a href="#">#16</a>  | For each group, number of participants (denominator) included in each analysis and whether the analysis was by original assigned groups           | Tables 1,2,4    |
| 10 |                         |                      |                                                                                                                                                   |                 |
| 11 |                         |                      |                                                                                                                                                   |                 |
| 12 |                         |                      |                                                                                                                                                   |                 |
| 13 |                         |                      |                                                                                                                                                   |                 |
| 14 | Outcomes and estimation | <a href="#">#17a</a> | For each primary and secondary outcome, results for each group, and the estimated effect size and its precision (such as 95% confidence interval) | 8, Figures 2-4  |
| 15 |                         |                      |                                                                                                                                                   |                 |
| 16 |                         | <a href="#">#17b</a> | For binary outcomes, presentation of both absolute and relative effect sizes is recommended                                                       | NA              |
| 17 |                         |                      |                                                                                                                                                   |                 |
| 18 |                         |                      |                                                                                                                                                   |                 |
| 19 |                         |                      |                                                                                                                                                   |                 |
| 20 | Ancillary analyses      | <a href="#">#18</a>  | Results of any other analyses performed, including subgroup analyses and adjusted analyses, distinguishing pre-specified from exploratory         | NA              |
| 21 |                         |                      |                                                                                                                                                   |                 |
| 22 |                         |                      |                                                                                                                                                   |                 |
| 23 |                         |                      |                                                                                                                                                   |                 |
| 24 |                         |                      |                                                                                                                                                   |                 |
| 25 |                         |                      |                                                                                                                                                   |                 |
| 26 |                         |                      |                                                                                                                                                   |                 |
| 27 |                         |                      |                                                                                                                                                   |                 |
| 28 |                         |                      |                                                                                                                                                   |                 |
| 29 | Harms                   | <a href="#">#19</a>  | All important harms or unintended effects in each group (For specific guidance see CONSORT for harms)                                             | 10, Table 4     |
| 30 |                         |                      |                                                                                                                                                   |                 |
| 31 |                         |                      |                                                                                                                                                   |                 |
| 32 |                         |                      |                                                                                                                                                   |                 |
| 33 | Limitations             | <a href="#">#20</a>  | Trial limitations, addressing sources of potential bias, imprecision, and, if relevant, multiplicity of analyses                                  | 11-12           |
| 34 |                         |                      |                                                                                                                                                   |                 |
| 35 |                         |                      |                                                                                                                                                   |                 |
| 36 |                         |                      |                                                                                                                                                   |                 |
| 37 | Interpretation          | <a href="#">#22</a>  | Interpretation consistent with results, balancing benefits and harms, and considering other relevant evidence                                     | 11-12           |
| 38 |                         |                      |                                                                                                                                                   |                 |
| 39 |                         |                      |                                                                                                                                                   |                 |
| 40 |                         |                      |                                                                                                                                                   |                 |
| 41 | Registration            | <a href="#">#23</a>  | Registration number and name of trial registry                                                                                                    | 2               |
| 42 |                         |                      |                                                                                                                                                   |                 |
| 43 | Protocol                | <a href="#">#24</a>  | Where the full trial protocol can be accessed, if available                                                                                       | Se Cover letter |
| 44 |                         |                      |                                                                                                                                                   |                 |
| 45 |                         |                      |                                                                                                                                                   |                 |
| 46 |                         |                      |                                                                                                                                                   |                 |
| 47 | Funding                 | <a href="#">#25</a>  | Sources of funding and other support (such as supply of drugs), role of funders                                                                   | 3               |
| 48 |                         |                      |                                                                                                                                                   |                 |
| 49 |                         |                      |                                                                                                                                                   |                 |

51 The CONSORT checklist is distributed under the terms of the Creative Commons Attribution License  
 52 CC-BY. This checklist can be completed online using <https://www.goodreports.org/>, a tool made by  
 53 the [EQUATOR Network](#) in collaboration with [Penelope.ai](#)  
 54

# BMJ Open

## The effect of intrathecal morphine and epidural analgesia on postoperative recovery after abdominal surgery for gynecologic malignancy. An open-label randomized trial.

|                                 |                                                                                                                                                                                                                                                                                                                                                                                                                                   |
|---------------------------------|-----------------------------------------------------------------------------------------------------------------------------------------------------------------------------------------------------------------------------------------------------------------------------------------------------------------------------------------------------------------------------------------------------------------------------------|
| Journal:                        | <i>BMJ Open</i>                                                                                                                                                                                                                                                                                                                                                                                                                   |
| Manuscript ID                   | bmjopen-2018-024484.R2                                                                                                                                                                                                                                                                                                                                                                                                            |
| Article Type:                   | Research                                                                                                                                                                                                                                                                                                                                                                                                                          |
| Date Submitted by the Author:   | 31-Dec-2018                                                                                                                                                                                                                                                                                                                                                                                                                       |
| Complete List of Authors:       | Kjohede, Preben; Linkopings universitet, Children and Women's Health, Department of Clinical and Experimental Medicine<br>Bergdahl, Olga; Vrinnevisjukhuset i Norrkoping, Department of Obstetrics and Gynecology<br>Borendal Wodlin, Ninnie; Linkopings Universitet Institutionen for klinisk och experimentell medicin, Dept. of Obstetrics and Gynecology<br>Nilsson, Lena; Region Ostergotland, Anesthesia and Intensive care |
| <b>Primary Subject Heading</b>: | Obstetrics and gynaecology                                                                                                                                                                                                                                                                                                                                                                                                        |
| Secondary Subject Heading:      | Anaesthesia, Surgery, Oncology                                                                                                                                                                                                                                                                                                                                                                                                    |
| Keywords:                       | Gynaecological oncology < GYNAECOLOGY, Quality in health care < HEALTH SERVICES ADMINISTRATION & MANAGEMENT, Adult surgery < SURGERY, Anaesthesia in oncology < ANAESTHETICS                                                                                                                                                                                                                                                      |
|                                 |                                                                                                                                                                                                                                                                                                                                                                                                                                   |

SCHOLARONE™  
Manuscripts

1  
2 *A Research Article entitled*

3  
4  
5  
6 ***The effect of intrathecal morphine and epidural analgesia on***  
7 ***postoperative recovery after abdominal surgery for gynecologic***  
8 ***malignancy. An open-label randomized trial.***  
9  
10  
11  
12  
13  
14  
15  
16

17 Authors:

18  
19  
20 Preben Kjølhed<sup>1</sup>, MD, PhD, Olga Bergdahl<sup>2</sup>, MD, Ninnie Borendal Wodlin<sup>1</sup>, MD,  
21  
22 PhD and Lena Nilsson<sup>3</sup>, MD, PhD.  
23  
24

25 Affiliations:

26  
27 <sup>1</sup> Children and Women's Health, Department of Clinical and Experimental Medicine, Linköping  
28 University, Linköping, Sweden

29  
30 <sup>2</sup> Department of Obstetrics and Gynecology, Vrinnevi Hospital, Norrköping, Sweden

31  
32 <sup>3</sup> Department of Anesthesiology and Intensive Care, and Department of Medical and Health  
33 Sciences, Linköping University, Linköping, Sweden.  
34  
35  
36  
37

38 Corresponding author:

39 Preben Kjølhed, MD, PhD  
40 Department of Obstetrics and Gynecology  
41 University Hospital  
42 S-581 85 Linköping  
43 Sweden  
44  
45 Phone: +46 101033187  
46  
47 E-mail: [Preben.Kjohlhede@liu.se](mailto:Preben.Kjohlhede@liu.se)  
48  
49  
50

51 Word count: 3439  
52  
53  
54  
55  
56  
57  
58  
59  
60

## Abstract

**Objectives:** We aimed to determine whether regional analgesia with intrathecal morphine (ITM) in an enhanced recovery program (ERAS) gives a shorter hospital stay with good pain relief and equal health-related quality of life (QoL) to epidural analgesia (EDA) in women after midline laparotomy for proven or assumed gynecological malignancies.

**Design:** An open-label, randomized, single center study.

**Setting:** A tertiary referral Swedish university hospital.

**Participants:** Eighty women, 18-70 years of age, ASA I and II, admitted consecutively to the department of Obstetrics and Gynecology.

**Interventions:** The women were allocated (1:1) to either the standard analgesic method at the clinic (EDA) or the experimental treatment (ITM). An ERAS protocol with standardized perioperative routines and standardized general anesthesia were applied. The EDA or ITM started immediately preoperatively. The ITM group received morphine, clonidine and bupivacaine intrathecally; the EDA group had an epidural infusion of bupivacaine, adrenalin and fentanyl.

**Primary and secondary outcome measures:** Primary endpoint was length of hospital stay (LOS). Secondary endpoints were QoL and pain assessments.

**Results:** The LOS was statistically significantly shorter for the ITM group compared with the EDA group (median (IQR) 3.3 (1.5-56.3) vs. 4.3 (2.2-43.2) days;  $p=0.01$ ). No differences were observed in pain assessment or QoL. The ITM group used postoperatively the first week significantly less opioids than the EDA group, (median (IQR) 20 mg (14-35 mg) vs. 81 mg (67-101 mg;  $p<0.0001$ ). No serious adverse events were attributed to ITM or EDA.

**Conclusions:** Compared with EDA, ITM is simpler to administer and manage, is associated with shorter hospital stay and reduces opioid consumption postoperatively with an equally good QoL. ITM is effective as postoperative analgesia in gynecological cancer surgery.

**Trial registration number:** Clinical Trials NCT02026687

**Keywords:** Regional analgesia; Gynecological malignancy; Laparotomy; Opioid consumption; Quality improvement

## ARTICLE SUMMARY

### STRENGTHS AND LIMITATIONS OF THIS STUDY

- This study evaluates quality improvement on postoperative recovery after gynecological cancer surgery in an enhanced recovery after surgery setting.
- The study is an open randomized controlled trial.
- The experimental treatment (intrathecal morphine) was compared with the standard care of postoperative analgesia (epidural analgesic) used in our setting.
- The objective was to compare the two analgesic methods in a clinical relevant multimodal context, not to find the appropriate doses or types of analgesic agent for each method.

### FUNDING STATEMENT

The study was supported financially by grants from the Swedish Society of Medicine (SLS-404711), the Medical Research Council of South-east Sweden (FORSS-8685), Linköping University and the Region Östergötland (LIO-356191, LIO-441781).

### COMPETING INTERESTS

The authors declare that they have no competing interests.

### DATA SHARING STATEMENT

No additional data are available.



## INTRODUCTION

Pain is an important component in the assessment of health-related quality of life (QoL). Besides the human suffering, insufficiently treated postoperative pain complicates mobilization, increases the risk for complications and might prolong hospitalization.

Regional analgesia with epidural analgesia (EDA) in abdominal surgery is recommended in most enhanced recovery after surgery (ERAS) protocols for use both during surgery and postoperatively.[1,2] Single-dose intrathecal morphine provide good analgesia during the first postoperative days after abdominal cancer surgery,[3-6] and improves the recovery after hysterectomy for benign conditions.[7,8] An additional analgesic effect can be obtained by adding the  $\alpha$ -adrenergic agonist clonidine intrathecally.[4,9,10] In surgery for malignant gynecological diseases intrathecal morphine has been less described, although Kara et al. [11] in 2012 reported reduced morphine consumption and no increase in side effects. A few randomized studies have compared single-dose intrathecal morphine with continuous EDA after major abdominal surgery, showing disputed results concerning pain relief and hospital stay.[12-14]

Based on the potential benefits of intrathecal morphine as an effective and technically simple applied postoperative analgesic we designed this randomized study to compare the effects of a single-dose intrathecal combined morphine and clonidine (ITM) with the standard of care in the hospital using EDA in an ERAS program for abdominal surgery for proven or assumed gynecological malignant tumors.

The aim of the study was to determine whether ITM when compared with EDA in an ERAS program, shorten hospital stay with a similar patient experienced QoL.

## MATERIAL AND METHODS

We conducted an open-label, randomized, controlled, single center study in accordance with Good Clinical Practice guidelines.[15] From March 2014 to January 2016 all women who were admitted to the department of Obstetrics and Gynecology, University Hospital, Linköping, Sweden due to a proven or assumed gynecological abdominal malignancy were eligible for the study. Women 18 to 70 years, World Health Organization (WHO) performance status < 2, American Society of Anesthesiologists (ASA) score < 3 and speaking Swedish fluently were included. Exclusion criteria were contraindications against regional analgesia, physical or psychiatric disability and surgery where pain could not be expected to be controlled by the regional analgesia. Oral and written informed consent was obtained from all participants.

At the preoperative visit the women were allocated to ITM and EDA, 1:1, from a computer-generated randomization code,[16] using sealed opaque envelopes. The participant was informed about the allocation.

Surgery was conducted through a midline laparotomy with the preoperative intention to obtain macroscopically radical tumor resection. If this was not possible the tumor burden was either to be reduced to the minimal residual tumor (less than 1 cm in size) or samples were to be obtained, preferably by salpingo-oophorectomy, in order to establish the histopathological diagnosis. Board-certified gynecological oncologists performed the surgery. The surgical technique used was at the discretion of the surgeon.

All women received thrombosis prophylaxis (tinzaparin 4500 anti-Xa IE subcutaneously) once daily for 28 days beginning the evening before the surgery, and prophylactic antibiotics (1.5 gram cefuroxime and 1.0 gram metronidazole intravenously (iv.) as a single dose) before surgery start.

All women received a standardized premedication with paracetamol 1995 mg. The allocated intervention of regional analgesic was applied prior to commencing the general anesthesia. The experimental treatment group (the ITM) had an intrathecal combination of a single dose isobar bupivacaine 15 mg, morphine 0.2 mg and clonidine 75µg, preferably through a 25G spinal needle. The EDA group had the standard EDA regime used in the hospital. The EDA was performed by a low thoracic puncture. The epidural infusion was started after induction of the general anesthesia but before surgery by a bolus dose of fentanyl 50-100 µg and a bolus from a mixture of bupivacaine 2.4 mg/ml, adrenalin 2.4 µg/ml and fentanyl 1.8 µg/ml. The same mixture was used as a continuous infusion, typically 4-8 ml/h, throughout surgery.

General anesthesia was standardized in both groups: induction with fentanyl and propofol, intubation facilitated with rocuronium and maintenance with sevoflurane. Fentanyl and rocuronium was repeated if needed. All patients had a gastric tube and an indwelling urinary catheter. The

1  
2 gastric tube was removed before waking the patient up. Local anesthetic (40 ml bupivacaine 2.5  
3 mg/ml) was injected prefascially and subcutaneously in the abdominal wall in the area of the skin  
4 incision.  
5  
6

7 After the initial monitoring at the postoperative care unit, the postoperative pain management  
8 including surveillance of possible opioid side effects and neurological complications took place at  
9 the gynecological ward and followed the routines outlined by the Swedish Society of  
10 Anesthesiology and Intensive Care.[17]  
11  
12

13  
14 The women in the ITM group received oral paracetamol 1330 mg and diclofenac 50 mg, both  
15 three times daily started on the day of surgery. Oxycodone 10-20 mg twice daily was added on the  
16 first postoperative day.  
17  
18

19 For the EDA group, a continuous epidural infusion of a mixture of bupivacain 1 mg/ml +  
20 adrenalin 2µg/ml + fentanyl 2 µg/ml including the possibility of additional patient-controlled bolus  
21 doses was started postoperatively at the postoperative care unit and continued until the morning of  
22 the third postoperative day. The infusion rate, normally 4-8 ml/h, and bolus doses, normally 2 ml,  
23 were decided on by the responsible physician. The patients also had oral paracetamol 1330 mg three  
24 times daily, starting on the day of surgery. Oral oxycodone 10-20 mg twice daily and diclofenac 50  
25 mg three times daily were added in the morning of the third postoperative day before removal of the  
26 epidural catheter according to the guidelines.[17]  
27  
28  
29  
30  
31  
32

33 Rescue opioids were the same for both groups; iv. morphine, 0.5-1 mg, iv. or oxycodone 5 mg  
34 orally was given if needed. In case of obvious pain relieving failure with the ITM or EDA iv.  
35 patient-controlled analgesia with morphine was started.  
36  
37

38 To quantify the amount of non-opioid analgesics given the defined daily dose (DDD)  
39 methodology was used.[18] All opioids, independent of administration route and including the ITM  
40 and the EDA, were converted to an equivalent iv. morphine dose.[19,20]  
41  
42

43 A numerical rating scale (NRS) 0-10 was used to assess the pain three times daily (8 am, 4  
44 pm, 10 pm) at rest and at mobilization, i.e. when moving out of bed, raising both legs when in bed  
45 or when giving a strong cough.  
46  
47

48 The standardized criteria for discharge were: the patient was mobilized, tolerated a normal  
49 diet, had sufficient pain relief with oral analgesics (NRS  $\leq$  4), showed no signs of mechanical bowel  
50 obstruction and had voided spontaneously with less than 150 ml residual urine. If the last criterion  
51 was not met, the woman went home with the catheter, which was removed polyclinically. The  
52 discharge criteria were checked twice daily. The decision on discharge was made according to the  
53 medical criteria but could be prolonged by social or other practical, personal conditions. Both the *de*  
54 *facto* hospital stay (LOS) and the length of the stay until the discharge criteria were met were  
55 calculated.  
56  
57  
58  
59  
60

1  
2 The research nurse had telephone contact with the participants the day after discharge and  
3 then once a week until six weeks postoperatively. Adverse events were registered and graded  
4 according to the Clavien-Dindo classification.[21] The study was completed after the six-week  
5 contact.  
6  
7

8  
9 The QoL was assessed by two commonly used validated generic QoL forms. The EQ-5D form  
10 was completed preoperatively, daily during the first week after surgery, then once weekly until the  
11 six-week postoperative visit. [22] The Short Form – 36 Health Survey (SF-36) form was completed  
12 preoperatively (baseline) and six weeks postoperatively.[23]  
13  
14

### 15 **Trial outcomes**

16  
17 The primary endpoint was the de facto duration of hospital stay (LOS). Secondary outcome  
18 measurers were QoL and pain assessments. As secondary post hoc outcomes we also registered the  
19 analgesic consumption, time to meet standardized discharge criteria, proportion of women  
20 discharged on the third postoperative day and adverse events.  
21  
22

### 23 **Patient involvement**

24  
25 Patients were not involved in the study design or conduct of the study. By assessing QoL as part of  
26 the protocol, the patients reported a surrogate measure of the burden of the intervention.  
27  
28

### 29 **Ethical approval**

30  
31 The study was approved by the Regional Ethics Board of Linköping University (D.nr. 2013/185-31,  
32 approval date 29 August 2013), the Swedish Medical Products Agency (Eu-nr. 2013-001873-25;  
33 D.nr. 5.1-2013-50334, approval date 1 August 2013) and monitored by an independent monitor.  
34  
35

### 36 **Statistics**

37  
38 Sample size calculation was based on the primary outcome endpoint. From our earlier studies on  
39 abdominal hysterectomy using ITM in an ERAS setting [7] the standard deviation for LOS was  
40 0.75 days. Providing that the minimum clinical relevant difference in hospital stay between the  
41 groups was 0.5 days, each group should consist of 40 women including a 10% dropout rate in order  
42 to show statistical significance at a 5% level (two-sided test) with an 80% power.  
43  
44

45  
46 Data are presented as median (inter quartile range), mean and (95% confidence interval) or  
47 number (percent).  $\chi^2$  tests and Fisher's exact tests were used to analyze categorical data and Mann-  
48 Whitney U-tests and Wilcoxon matched pair tests for continuous data.  
49  
50

51  
52 A repeated measures analysis of variance (ANOVA) was used to analyze data measured on  
53 more occasions. When  $p \leq 0.10$  in the analysis of the main effect between groups in the repeated  
54 measures ANOVA, the pairwise associations between groups on each single occasion of  
55 measurement were analyzed using the Bonferroni post hoc test.  
56  
57  
58  
59  
60

1  
2 The significance level was set at  $p < 0.05$ . The statistical tests were two-tailed. All analyses  
3 were carried out according to intention-to-treat principles using Statistica v13.2 (Dell Software, 5  
4 Polaris Way, Aliso Viejo, CA 92656, USA).  
5  
6  
7  
8  
9  
10  
11  
12  
13  
14  
15  
16  
17  
18  
19  
20  
21  
22  
23  
24  
25  
26  
27  
28  
29  
30  
31  
32  
33  
34  
35  
36  
37  
38  
39  
40  
41  
42  
43  
44  
45  
46  
47  
48  
49  
50  
51  
52  
53  
54  
55  
56  
57  
58  
59  
60

For peer review only

## RESULTS

The description of the selection and the randomization of the study population is presented in Figure 1. Forty women were chosen to receive EDA and 40 to receive ITM. One woman in each group did not receive any regional analgesia and one woman had ITM instead of EDA based on a mistake by the attending anesthesiologist.

The descriptive and demographic data are shown in Table 1. The clinical surgical and anesthesiological data are presented descriptively in Table 2. None of the differences between the two treatment groups were considered to be of clinical significance.

In 20% the final diagnosis postoperatively was benign, most often showing a benign ovarian tumor or a large uterine fibroid. The benign diseases were evenly distributed between the two groups.

The LOS was statistically significantly shorter for the ITM group compared with the EDA group (median (IQR) 3.3 (3.1-4.8) vs. 4.3 (3.4-5.2) days;  $p=0.01$ ). The time to meet standardized discharge criteria was significantly shorter in the ITM group compared with the EDA group (median (IQR) 3.0 (2.5-3.5) vs. 4.0 (3.5-4.5) days;  $p<0.001$ ). Significantly more women in the ITM group were discharged from the hospital on the third day (25 women (62.5%) in the ITM group vs. 12 (30%) in the EDA group, ( $p=0.004$ ).

The QoL parameters as measured by the EQ-5D, day-by-day, presented no statistically significant difference in health index between the two groups (Figure 2). Neither did the SF-36 show any statistically significant differences in the difference of baseline and 42-days assessments in any of the subscales or summary scores between the groups (Table 3). The role physical and the physical component summary score had not recovered to baseline level in either of the two groups after six weeks whereas the mental health and the mental component summary score showed a significant improvement after six weeks compared with the baseline assessment in the ITM group.

There was no significant difference in the overall assessment of pain (NRS) between the groups (Figure 3 and 4). The two groups showed different patterns in the NRS ratings as indicated by the significant interaction effects. The post hoc tests showed that the NRS ratings were significantly higher in the ITM group during the first two days at mobilization, whereas the EDA group scored significantly higher both at rest and at mobilization on day three when the EDA catheter was removed. The ITM group had a significantly lower total consumption of opioids than the EDA group whereas the use of non-opioids was similar in the two groups (Figure 5 and 6). The comparison of the non-opioids first started on Day 3 when the protocol allowed equal administration of per oral analgesics for the EDA and ITM groups. Postoperatively, during day 0 to day 6 the total consumption of opioids were median (IQR) 20 mg (14-35 mg) in the ITM group compared with 81 mg (67-101 mg) in the EDA group ( $p<0.0001$ ).

1  
2 The EDA failed in four women (10%) and ITM analgesia in one (2.5%). These women had  
3 either a new EDA in the post-anesthesia care or received patient-controlled morphine iv. One  
4 accidental dural puncture occurred in the EDA group. No post-dural puncture headache or  
5 anesthesiological adverse effects were observed in either of the groups. The perioperative adverse  
6 events graded according to the Clavien-Dindo classification in the two groups did not differ  
7 significantly (p=0.31) as shown in Table 4.  
8  
9  
10  
11  
12  
13  
14  
15  
16  
17  
18  
19  
20  
21  
22  
23  
24  
25  
26  
27  
28  
29  
30  
31  
32  
33  
34  
35  
36  
37  
38  
39  
40  
41  
42  
43  
44  
45  
46  
47  
48  
49  
50  
51  
52  
53  
54  
55  
56  
57  
58  
59  
60

For peer review only

## DISCUSSION

The study showed that a single-dose of intrathecal morphine used as postoperative analgesia compared with epidural analgesia gives advantages in abdominal gynecological cancer surgery in regard to the length of hospital stay, the time to meet the standardized discharge criteria and lower consumption of opioids postoperatively. A substantially higher proportion of women with ITM was discharged on the third postoperative day with an evenly reported health-related QoL and assessment of pain as women with EDA. A key point of an ERAS protocol is simplicity and a single intrathecal injection is simpler than a continuous epidural requiring ongoing management and monitoring. We regard ITM as a quality improvement from the perspective of both the patients and the health care.

The strengths of this trial are the randomized design, the unanimous ERAS and postoperative surveillance of the patients in the gynecological ward, the assessment of pain at rest and during mobilization, and the active use of rescue analgesics on demand. For obvious reasons the interventions could not be blinded for the participants or the staff. This might be a source of bias, but we believe that the potential influence of such bias will be limited and unavoidable in the study design used. A limitation for generalization of the results is the single center design. The ERAS concept is well established in daily clinical work and therefore the results can only be generalized to facilities with similar clinical standards and only to units that manage patients with regional analgesia. The two methods of regional analgesia may not be comparable in giving potentially equivalent analgesia with the dosage and preparation used. However, our objective was to compare the two analgesic methods in a clinical context, not to find the appropriate doses or types of analgesic agent for each method. Therefore, we selected conventional doses of the medications.

The use of intrathecal opioids requires close monitoring of sedation and respiratory rate for 12 hours. The nurses on the gynecological ward were educated regarding complications after ITM with special regard to late respiratory depression and the surveillance followed strict national recommendations. Intrathecal morphine is used in approximately two-thirds of Swedish gynecological units in connection with abdominal hysterectomy having a continued observation on the regular gynecological ward after an initial period of 2-6 hours in a postoperative care unit.[24] The intrathecal morphine dose 0.2 mg was chosen with the purpose of giving adequate analgesia at a risk of respiratory depression that equals systemic opioid analgesia.[25] Following abdominal hysterectomy there is no benefit from increasing the morphine dose over 0.2 mg.[26] The  $\alpha$ -agonist clonidine possesses an anti nociceptive effect from receptors located in the central nervous system. The addition of clonidine to intrathecal opioids further prolongs postoperative analgesia.[10]

The *de facto* duration of hospital stay was shorter in the ITM group. A reduction of hospital stay with one day has clinical relevance for both the patient and the health care system. A similar



1  
2 short length of stay has recently been reported from other ERAS programs for gynecological  
3 cancer.[27-29] Wijk et al.[27] used an analgesic regimen based on oral paracetamol and diclofenac  
4 and over 90% of the patients did not need systemic opioids from the day after surgery. Like our  
5 study, they used standardized discharge criteria. It is important to analyze when discharge criteria  
6 are fulfilled, as they are robust and generalizable. The length of hospital stay is often influenced by  
7 context-specific social factors.  
8  
9

10  
11  
12 In this study, we compared two multimodal analgesic regimens considered clinically relevant.  
13 For that reason, we aimed to make each regimen as optimal as possible. As a consequence, there  
14 were differences in non-opioids as well as opioid regimens until the epidural catheter was removed.  
15 Only rescue opioids were equal for both groups. Thus, the aim was not to compare the intrathecal  
16 and the epidural routes per se.  
17  
18

19  
20  
21 Multimodal analgesic regime minimizing opioid use has been shown to enhance  
22 recovery.[2,30] ITM has become a well-documented component in several ERAS protocols [29,  
23 31-34] and a protocol for a systematic review of ITM in abdominal and thoracic surgery patients  
24 has recently been published.[35] Despite the higher rating of NRS at mobilization during the first  
25 few days in the ITM group the consumption of opioids was nearly three times lower in the same  
26 time period compared with the EDA group, and the QoL index did not differ between the groups.  
27 This may imply that the women in the ITM group were as satisfied as the EDA group with their  
28 pain management, and the difference in NRS rating at mobilization was less clinically significant.  
29 The study included only ASA class I-II patients. For patients with more severe comorbidity the  
30 EDA regimen could be favorable as it offers a better early analgesia that especially patients at risk  
31 for complications could benefit from. A study on abdominal hysterectomy for endometrial cancer  
32 showed that women without EDA ceased opioid analgesia earlier than those women who had an  
33 EDA,[36] indicating a possible overuse of opioids in EDA. An earlier removal of the EDA catheter,  
34 for example after 48 hours, is a possible development of the EDA regimen. Prior to this trial, the  
35 standard praxis in our department was removal of the EDA catheter on the third day. Consequently,  
36 we studied the ITM against this regime. The difference in DDD of non-opioids seen until the third  
37 postoperative day was due to the protocol demand and the clinical routine in the hospital that  
38 diclofenac was not allowed in the EDA group until the EDA catheter was removed. The uneven use  
39 of diclofenac in the groups during the first three postoperative days may be seen as a weakness of  
40 the study. However, the DDD of non-opioids raised from day 1 to day 3 in the EDA group by using  
41 diclofenac in some patients against the study protocol and the clinical routines in the department. It  
42 is therefore less likely that the difference in DDD of non-opioids can explain the significant  
43 difference in opioids. In spite of the addition of diclofenac and consequently an increased DDD on  
44 the third postoperative day, the women in the EDA group rated the NRS at rest and at mobilization  
45  
46  
47  
48  
49  
50  
51  
52  
53  
54  
55  
56  
57  
58  
59  
60

1  
2 higher than the ITM women. Our EDA regimen including complementary analgesics was obviously  
3 not optimal in preventing breakthrough pain in connection with terminating the epidural infusion.  
4 The opioid sparing effect of ITM has been demonstrated in a study analyzing the first 48  
5 postoperative hours.[37] Our study might indicate an even longer benefit.  
6  
7

8  
9 In order to increase the patient-oriented focus on recovery we used two generic QoL forms to  
10 assess the patient-reported outcome of the health status. The EQ-5D was used to determine the  
11 short-term recovery day-by-day, whereas the SF-36 was used for a longer-term assessment. The  
12 short-term recovery in QoL did not seem to differ between the two regimes but at the longer term,  
13 the ITM seemed to give more pronounced advantages than EDA in the recovery of the mental  
14 health. The clinical importance of this remains unclear and merits further exploration. To the best of  
15 our knowledge, there is no condition-specific patient-reported outcome form for our patient group.  
16 Although there is no evidence of content validity for the EQ-5D or SF-36 for the specific patient  
17 group in this study, they are widely used and allow comparisons with population norms. A new  
18 form of the EQ-5D, EQ-5D-5L, has been developed with the aim to better capture smaller health  
19 changes.[38] At the time of the study there was no Swedish value set available for EQ-5D-5L.  
20  
21

22  
23 Severe complications after EDA and ITM are rare but still the indication for the regional  
24 analgesia should always be considered individually. In this trial no severe complications attributed  
25 to the regional analgesia occurred and the adverse events seemed to be equally distributed between  
26 the groups. However, the trial was not powered to detect a statistical difference in adverse events.  
27  
28

29  
30 In conclusion, ITM given in an ERAS program seems to be safe, simple to administer and  
31 effective as postoperative analgesia and gives quality advantages concerning the postoperative  
32 recovery in gynecological abdominal cancer surgery.  
33  
34  
35  
36  
37  
38  
39  
40  
41  
42  
43  
44  
45  
46  
47  
48  
49  
50  
51  
52  
53  
54  
55  
56  
57  
58  
59  
60

## ACKNOWLEDGEMENTS

The research nurses Åsa Rydmark Kersley, Linda Shosholli and Gunilla Gagnö are thanked for their invaluable dedicated work and support during the study.

For peer review only

**REFERENCES**

1. Nygren J, Thacker J, Carli F, et al. Guidelines for perioperative care in elective rectal/pelvic surgery: Enhanced Recovery After Surgery (ERAS®) Society recommendations. *Clin Nutr* 2012;31:801-16.
2. Feldheiser A, Aziz O, Baldini G, et al. Enhanced recovery after surgery (ERAS) for gastrointestinal surgery, part 2: consensus statement for anaesthesia practice. *Acta Anaesthesiol Scand* 2016;60:289–334.
3. Devys JM, Mora A, Plaud B, et al. Intrathecal + PCA morphine improves analgesia during the first 24 hr after major abdominal surgery compared to PCA alone. *Can J Anesth* 2003;50:355-61.
4. Andrieu G, Roth B, Ousmane L, et al. The efficacy of intrathecal morphine with or without clonidine for postoperative analgesia after radical prostatectomy. *Anesth Analg* 2009;108:1954-7.
5. Sakowska M, Docherty E, Linscott D, et al. A change in practice from epidural to intrathecal morphine analgesia for hepato-pancreato-biliary surgery. *World J Surg* 2009;33:1802-8.
6. Bujedo BM, Santos SG, Azpiazu AU. A review of epidural and intrathecal opioids used in the management of postoperative pain. *J Opioid Manag* 2012;8:177-92.
7. Borendal Wodlin N, Nilsson L, Kjølhed P. The impact of mode of anaesthesia on postoperative recovery from fast-track abdominal hysterectomy: a randomised clinical trial. *BJOG* 2011;118:299-308.
8. Kroon U-B, Rådström M, Hjelthe C, et al. Fast-track hysterectomy: A randomised, controlled study. *Eur J Obstet Gynecol Reprod Biol* 2010;151:203-7.
9. Engelman E, Marsala C. Efficacy of adding clonidine to intrathecal morphine in acute postoperative pain: meta-analysis. *Br J Anaesth* 2013;110:21-7.
10. Sites BD, Beach M, Biggs R, et al. Intrathecal clonidine added to a bupivacaine-morphine spinal anesthetic improves postoperative analgesia for total knee arthroplasty. *Anesth Analg*. 2003;96:1083-8.
11. Kara I, Apiliogullari S, Oc B, et al. The effects of intrathecal morphine on patient-controlled analgesia, morphine consumption, postoperative pain and satisfaction scores in patients undergoing gynaecological oncological surgery. *J Int Med Res* 2012;40:666-72.
12. De Pietri L, Siniscalchi A, Reggiani A, et al. The use of intrathecal morphine for postoperative pain relief after liver resection: a comparison with epidural analgesia. *Anesth Analg* 2006;102:1157-63.

- 1  
2 13. Koea JB, Young Y, Gunn K. Fast track liver resection: the effect of a comprehensive care  
3 package and analgesia with single dose intrathecal morphine with gabapentin or continuous  
4 epidural analgesia. *HPB Surgery* 2009;2009:271986.
- 5  
6  
7 14. Vercauteren M, Vereecken K, La Malfa M, et al. Cost-effectiveness of analgesia after  
8 Caesarean section. A comparison of intrathecal morphine and epidural PCA. *Acta*  
9 *Anaesthesiol Scand* 2002;46:85-9.
- 10  
11  
12 15. International Conference on Harmonisation of technical requirements for registration of  
13 pharmaceuticals for human use. Good Clinical Practice. Available online at: <http://ichgcp.net/>.  
14 (Accessed April 28; 2018).
- 15  
16  
17 16. Simple Interactive Statistical Analysis. Allocation. Available online at:  
18 <http://www.quantitativeskills.com/sisa/>. (Accessed April 28; 2018).
- 19  
20  
21 17. Svensk Förening för Anestesi och Intensivvård. Postoperative analgesia (In Swedish).  
22 Available online at: [https://sfai.se/riktlinje/medicinska-rad-och-](https://sfai.se/riktlinje/medicinska-rad-och-riktlinjer/anestesi/postoperativ-smartlindring/)  
23 [riktlinjer/anestesi/postoperativ-smartlindring/](https://sfai.se/riktlinje/medicinska-rad-och-riktlinjer/anestesi/postoperativ-smartlindring/). (Accessed April 28; 2018).
- 24  
25  
26 18. WHO Collaborating Centre for Drug Statistics Methodology. ATC/DDD Index 2017.  
27 Available online at: [https://www.whocc.no/atc\\_ddd\\_index/](https://www.whocc.no/atc_ddd_index/). (Accessed April 28; 2018).
- 28  
29  
30 19. Loper K, Ready B, Downey M, et.al. Epidural and intravenous fentanyl infusions are  
31 clinically equivalent after knee surgery. *Anest Analg* 1990;70:72-5.
- 32  
33 20. Caraceni A, Hanks G, Kaasa S, et al. Use of opioid analgesics in the treatment of cancer pain:  
34 evidence-based recommendations from the EAPC. *Lancet Oncol* 2012;13:e58-68.
- 35  
36  
37 21. Dindo D, Demartines N, Clavien PA. Classification of surgical complications. A new  
38 proposal with evaluation in a cohort of 6336 patients and results of a survey. *Ann Surg*  
39 2004;240:206-13.
- 40  
41  
42 22. The EuroQol Group. EuroQol – a new facility for the measurement of health-related quality  
43 of life. *Health Policy* 1990;16:199-208.
- 44  
45  
46 23. Sullivan M, Karlsson J, Ware JE. The Swedish SF-36 Health Survey I. Evaluation of data  
47 quality, scaling assumptions, reliability and construct validity across general populations in  
48 Sweden. *Soc Sci Med* 1995;41:1349-58.
- 49  
50  
51 24. Hein A, Gillis-Haegerstrand C, Jakobsson J. Neuraxial opioids as analgesia in labour,  
52 caesarean section and hysterectomy: A questionnaire survey in Sweden. Version 2.  
53 *F1000Research* 2017,6:133.
- 54  
55  
56 25. Gehling M, Tryba M. Risks and side-effects of intrathecal morphine combined with spinal  
57 anaesthesia: a meta-analysis. *Anaesthesia* 2009;64:643-51.
- 58  
59  
60

- 1
  - 2
  - 3
  - 4
  - 5
  - 6
  - 7
  - 8
  - 9
  - 10
  - 11
  - 12
  - 13
  - 14
  - 15
  - 16
  - 17
  - 18
  - 19
  - 20
  - 21
  - 22
  - 23
  - 24
  - 25
  - 26
  - 27
  - 28
  - 29
  - 30
  - 31
  - 32
  - 33
  - 34
  - 35
  - 36
  - 37
  - 38
  - 39
  - 40
  - 41
  - 42
  - 43
  - 44
  - 45
  - 46
  - 47
  - 48
  - 49
  - 50
  - 51
  - 52
  - 53
  - 54
  - 55
  - 56
  - 57
  - 58
  - 59
  - 60
26. Hein A, Rösblad P, Gillis-Haegerstrand C, et al. Low dose intrathecal morphine effects on post-hysterectomy pain: a randomized placebo-controlled study. *Acta Anesth Scand* 2012;56:102-9.
27. Wijk L, Franzén K, Ljungqvist O, et al. Enhanced Recovery after Surgery Protocol in Abdominal Hysterectomies for Malignant versus Benign Disease. *Gynecol Obstet Invest* 2016;81:461-7.
28. Carter J. Fast-track surgery in gynaecology and gynaecologic oncology: a review of a rolling clinical audit. *ISRN Surg* 2012;2012:368014.
29. Dickson EL, Stockwell E, Geller MA, et al. Enhanced recovery program and length of stay after laparotomy on a gynecologic oncology service: a randomized controlled trial. *Obstet Gynecol* 2017;129:355-62.
30. Nelson G, Altman AD, Nick A, et al. Guidelines for postoperative care in gynecologic/oncology surgery: Enhanced Recovery After Surgery (ERAS®) Society recommendations — Part II. *Gynecol Oncol* 2016;140:323-32.
31. Khalil A, Ganesh S, Hughes C, et al. Evaluation of the enhanced recovery after surgery protocol in living liver donors. *Clin Transplant*. 2018;32:e13342
32. Koning MV, Teunissen AJW, van der Harst E, et al. Intrathecal Morphine for Laparoscopic Segmental Colonic Resection as Part of an Enhanced Recovery Protocol: A Randomized Controlled Trial. *Reg Anesth Pain Med*. 2018;43:166-173.
33. Helander EM, Webb MP, Bias M, et al. Use of Regional Anesthesia Techniques: Analysis of Institutional Enhanced Recovery After Surgery Protocols for Colorectal Surgery. *J Laparoendosc Adv Surg Tech A*. 2017 ;27:898-902.
34. Virlos I, Clements D, Beynon J, et al. Short-term outcomes with intrathecal versus epidural analgesia in laparoscopic colorectal surgery. *Br J Surg*. 2010 ;97:1401-6.
35. Pitre L, Garbee D, Tipton J, et al. Effects of preoperative intrathecal morphine on postoperative intravenous morphine dosage: a systematic review protocol. *JBIC Database System Rev Implement Rep*. 2018;16:867-870.
36. Belavy D, Janda M, Baker J, et al. Epidural analgesia is associated with an increased incidence of postoperative complications in patients requiring an abdominal hysterectomy for early stage endometrial cancer. *Gynecol Oncol* 2013;131:423–9.
37. Massicotte L, Chalaou KD, Beaulieu D, et al. Comparison of spinal anesthesia with general anesthesia on morphine requirement after abdominal hysterectomy. *Acta Anaesthesiol Scand* 2009;53:641-647
38. Devlin NJ, Shah KK, Feng Y, et al. Valuing health-related quality of life: An EQ-5D-5L value set for England. *Health Economics*. 2018; 27:7-22.

## FIGURE LEGENDS

- 1  
2  
3  
4 Figure 1. CONSORT flow chart of participants in the study. EDA, epidural analgesia. ITM,  
5 intrathecal morphine analgesia.  
6  
7 Figure 2. Illustration of EQ-5D weighted health state index in relation to occasion of  
8 measurement. Plots represent means and bars represent 95% confidence interval.  
9  
10 Result of the repeated measures ANOVA and post hoc tests from Day 0 - 42  
11 assessment is presented. EDA = epidural analgesia; ITM = intrathecal morphine  
12 analgesia. No significant differences were observed in the EQ-5D health index  
13 between the two groups preoperatively.  
14  
15  
16  
17  
18 Figure 3 and 4. Assessment of pain by means of a 10 graded numeric rating scale (NRS) at rest  
19 and at mobilization. Plots represent means and bars represent 95% confidence  
20 interval. Results of the repeated measures ANOVA and post hoc tests from Day 0  
21 to the Day 6 are shown in the table below the diagrams. Assessments done from  
22 the evening of surgery and three times daily. Day 1.1, 1.2 and 1.3, respectively,  
23 represent the measurements performed in the morning, the afternoon and the  
24 evening on Day 1. EDA = epidural analgesia; ITM = intrathecal morphine  
25 analgesia.  
26  
27  
28  
29  
30  
31  
32  
33 Figure 5 and 6. Consumption of analgesics after surgery in relation to occasion of measurement.  
34 Plots represent means and bars represent 95% confidence interval. Results of the  
35 repeated measures ANOVA and post hoc tests from Day 0 to the Day 6  
36 assessment for equivalent morphine given and from Day 3 to Day 42 for DDD  
37 non-opioids are presented in the table below the diagrams. DDD = defined daily  
38 dose; EDA = epidural analgesia; ITM = intrathecal morphine analgesia.  
39  
40  
41  
42  
43  
44  
45  
46  
47  
48  
49  
50  
51  
52  
53  
54  
55  
56  
57  
58  
59  
60

1  
2 **AUTHOR STATEMENT**  
3

4  
5 **AUTHOR'S CONTRIBUTION**  
6

7 PK, NBW and LN designed and conducted the study. PK performed the statistically analyses. PK,  
8 OB, NBW and LN undertook the initial interpretation of the data, which was followed by  
9 discussions with all the authors. PK, OB and LN drafted the initial version of the manuscript,  
10 followed by a critical revision process for intellectual content involving all authors. All authors  
11 agreed to the final version of the manuscript before submission. All authors agree to be accountable  
12 for the accuracy of any part of the work.  
13  
14  
15  
16  
17  
18  
19  
20  
21  
22  
23  
24  
25  
26  
27  
28  
29  
30  
31  
32  
33  
34  
35  
36  
37  
38  
39  
40  
41  
42  
43  
44  
45  
46  
47  
48  
49  
50  
51  
52  
53  
54  
55  
56  
57  
58  
59  
60



Table 1. Descriptive and demographic data of the study population.

|                                       | EDA group<br>n = 40 | ITM group<br>n = 40 |
|---------------------------------------|---------------------|---------------------|
| Age (years)                           | 59.0 (51.5-66.0)    | 58.5 (54.0-62.5)    |
| < 50 years                            | 7 (17.5%)           | 6 (15%)             |
| 50 – 60 years                         | 16 (40%)            | 20 (50%)            |
| > 60 years                            | 17 (42.5%)          | 14 (35%)            |
| Body mass index (kg/m <sup>2</sup> )  | 28.5 (24.7-31.2)    | 27.8 (23.4-31.2)    |
| BMI < 25 kg/m <sup>2</sup>            | 11 (27.5%)          | 13 (32.5%)          |
| BMI 25-29.9 kg/m <sup>2</sup>         | 15 (37.5%)          | 15 (37.5%)          |
| BMI 30-34.9 kg/m <sup>2</sup>         | 9 (22.5%)           | 7 (17.5%)           |
| BMI ≥ 35 kg/m <sup>2</sup>            | 5 (12.5%)           | 5 (12.5%)           |
| Parity                                | 2.0 (0-5)           | 2.0 (0-4)           |
| Smokers                               | 5 (12.5%)           | 4 (10%)             |
| Previous laparotomy                   | 17 (42.5%)          | 17 (42.5%)          |
| ASA classification                    |                     |                     |
| Class I                               | 15 (37.5%)          | 15 (37.5%)          |
| Class II                              | 25 (62.5%)          | 25 (62.5%)          |
| Comorbidity                           |                     |                     |
| Diabetes mellitus                     | 4 (10%)             | 4 (10%)             |
| Cardiovascular disease                | 13 (32.5%)          | 12 (30%)            |
| Pulmonary disease                     | 4 (10%)             | 5 (12.5%)           |
| Mild psychiatric disease              | 6 (12.5%)           | 4 (10%)             |
| Previous malignancy                   | 4 (10%)             | 2 (5%)              |
| Current medication                    |                     |                     |
| Antidepressant/sedative               | 8 (20%)             | 7 (17.5%)           |
| Analgesics                            | 7 (17.5%)           | 12 (30%)            |
| Indication for surgery                |                     |                     |
| Proven/assumed gynecologic malignancy | 16/24 (40%/60%)     | 18/22 (45%/55%)     |

Figures denote median and (inter quartile range) or number and (percent).

ASA, American Society of Anesthesiologists risk classification; BMI, body mass index. EDA, epidural analgesia. ITM, intrathecal morphine analgesia

Table 2. Clinical surgical and anesthesiological data.

|                                                                   | EDA group<br>n = 40 | ITM group<br>n = 40 |
|-------------------------------------------------------------------|---------------------|---------------------|
| Operation time (minutes)                                          | 116 (80-151.5)      | 139 (99.5-169)      |
| Estimated per-operative blood loss (ml)                           | 100 (50-275)        | 200 (50-250)        |
| Extent of skin incision from superior edge of symphysis pubis to: |                     |                     |
| - umbilicus                                                       | 6 (15%)             | 2 (5%)              |
| - between umbilicus and processus xiphoideus                      | 17 (42.5%)          | 21 (52.5%)          |
| - processus xiphoideus                                            | 17 (42.5%)          | 17 (42.5%)          |
| Extent of surgery (no. of women)                                  |                     |                     |
| - Category I                                                      | 1 (2.5%)            | 1 (2.5%)            |
| - Category II                                                     | 8 (20%)             | 2 (5%)              |
| - Category III                                                    | 17 (42.5%)          | 18 (45%)            |
| - Category IV                                                     | 8 (20%)             | 14 (35%)            |
| - Category V                                                      | 6 (15%)             | 5 (12.5%)           |
| Tumor status at end of surgery <sup>†</sup> (no. of women):       |                     |                     |
| - Macroscopically radical                                         | 17 (63%)            | 25 (76%)            |
| - Minimal disease                                                 | 3 (11%)             | 5 (15%)             |
| - Bulky disease                                                   | 7 (26%)             | 3 (9%)              |
| Histopathological diagnosis: malignant /benign                    | 27/13 (67.5/32.5%)  | 33/7 (82.5/17.5%)   |
| - Ovarian/fallopian tube/peritoneal cancer                        | 13 (32.5%)          | 18 (45%)            |
| - Ovarian borderline cancer                                       | 5 (12.5%)           | 0 (0%)              |
| - Uterus carcinoma or sarcoma                                     | 7 (17.5%)           | 13 (32.5%)          |
| - Cervical cancer                                                 | 1 (2.5%)            | 0 (0%)              |
| - Appendix or sigmoideum cancer                                   | 1 (2.5%)            | 2 (5%)              |
| - Benign ovarian or uterine tumor                                 | 13 (32.5%)          | 7 (17.5%)           |
| CAD at discharge (no. of women)                                   | 3 (7.7%)            | 4 (10.3%)           |
| Premedication                                                     |                     |                     |
| Paracetamol (DDD)                                                 | 0.67 (0.44-0.67)    | 0.67 (0.67-0.67)    |
| Morphine <sup>§</sup> (mg)                                        | 0 (0-0.75)          | 0 (0-0)             |
| Antiemetic, medication (no. of women)                             | 16 (57%)            | 12 (43%)            |
| Antiemetic, Acupressure band (no. of women)                       | 22 (47%)            | 25 (53%)            |
| Anesthetic drugs:                                                 |                     |                     |
| Propofol (mg)                                                     | 200 (160-240)       | 200 (160-260)       |
| Rocuronium bromid (mg)                                            | 50 (40-60)          | 50 (40-62.5)        |
| Equivalent morphine dose (mg)                                     | 30.5 (27.3-41.3)    | 45.0 (40.0-50.0)    |
| Paracetamol (mg)                                                  | 0 (0-0)             | 0 (0-0)             |
| Vasoactive treatment during anesthesia                            |                     |                     |
| Ephedrine (mg)                                                    | 20 (7.5-25)         | 20 (15-25)          |
| Phenylephrine (µg)                                                | 0 (0-1062)          | 0 (0-1440)          |
| Norepinephrine (µg)                                               | 0 (0-21)            | 0 (0-130)           |
| Atropine (mg)                                                     | 0 (0-0)             | 0 (0-0.5)           |
| Anesthesia time (minutes)                                         | 177.5 (142.5-202.5) | 200 (155-240)       |
| Lowest body temperature during surgery (°C)                       | 35.7 (35.5-36.1)    | 35.6 (35.4-35.9)    |
| Body temperature at end of surgery (°C)                           | 36.1 (35.9-36.4)    | 36.1 (35.7-36.3)    |
| Time in PACU (hours)                                              | 4.6 (4.2-5.6)       | 5.7 (4.0-8.1)       |

Figures denote number and (percent) or median and (inter quartile range).

CAD, transurethral or supra pubic indwelling catheter. DDD, defined daily dose. EDA, epidural analgesia. ITM, intrathecal morphine analgesia. PACU, post anesthesia care unit.

1  
2 Categories of extent of surgery: Category I, diagnostic surgery; Category II, resection of  
3 gynecologic organs only; Category III, resection of gynecologic organs, omentectomy and ±  
4 appendectomy; Category IV, as Category III + pelvic and/or paraaortic lymphadenectomy;  
5 Category V, as Category III ± pelvic and/or paraaortic lymphadenectomy + resection of abdominal  
6 visceral organs.  
7  
8  
9  
10  
11  
12  
13  
14  
15  
16  
17  
18  
19  
20  
21  
22  
23  
24  
25  
26  
27  
28  
29  
30  
31  
32  
33  
34  
35  
36  
37  
38  
39  
40  
41  
42  
43  
44  
45  
46  
47  
48  
49  
50  
51  
52  
53  
54  
55  
56  
57  
58  
59  
60

For peer review only

Table 3. SF-36 subscales and summary scores. A high score represents a better health-related quality of life

| SF-36 subscales                  | Time lapse  |             |            |              | EDA    | Day 42 - Baseline |           |             |
|----------------------------------|-------------|-------------|------------|--------------|--------|-------------------|-----------|-------------|
|                                  | Baseline    |             | Day 42     |              |        | EDA               | ITM       | EDA vs. ITM |
|                                  | EDA         | ITM         | EDA        | ITM          |        | p-value *         | p-value * | p-value **  |
| Physical functioning             | 85 (63-95)  | 80 (65-95)  | 80 (65-95) | 83 (68-90)   | 0.91   | 0.95              | 0.69      |             |
| Role physical                    | 38 (0-100)  | 63 (0-100)  | 0 (0-13)   | 0 (0-0)      | <0.001 | <0.0001           | 0.16      |             |
| Bodily pain                      | 51 (37-100) | 62 (47-84)  | 58 (42-74) | 74 (52-84)   | 0.96   | 0.92              | 0.95      |             |
| General health                   | 75 (57-85)  | 72 (55-81)  | 70 (47-87) | 72 (59-81)   | 0.10   | 0.65              | 0.10      |             |
| Vitality                         | 53 (40-75)  | 53 (43-70)  | 45 (33-68) | 55 (43-70)   | 0.08   | 0.90              | 0.20      |             |
| Social functioning               | 75 (50-100) | 75 (56-81)  | 75 (50-88) | 75 (50-75)   | 0.15   | 0.70              | 0.09      |             |
| Role emotional                   | 100 (0-100) | 100 (0-100) | 83 (0-100) | 100 (33-100) | 0.65   | 0.25              | 0.30      |             |
| Mental health                    | 76 (60-84)  | 70 (60-80)  | 78 (66-84) | 80 (66-86)   | 0.54   | <0.01             | 0.13      |             |
| Physical component summary score | 44 (34-53)  | 45 (34-53)  | 39 (34-44) | 38 (35-42)   | 0.03   | <0.01             | 0.41      |             |
| Mental component summary score   | 46 (35-52)  | 46 (35-51)  | 49 (34-53) | 51 (39-55)   | 0.69   | 0.01              | 0.05      |             |

Figures indicate median (inter quartile range). EDA = epidural analgesia. ITM = intrathecal morphine analgesia.

\* Wilcoxon matched pair tests. \*\* Mann-Whitney U test.

No significant differences were observed in the subscales between the two groups at baseline (Mann-Whitney U-test).

Table 4. The Clavien-Dindo classification of adverse events (contracted form) within the study period of six weeks.

|                  | EDA group<br>(n=40) | ITM group<br>(n=40) |
|------------------|---------------------|---------------------|
| No complications | 19 (47.5)           | 19 (47.5)           |
| Grade I          | 13 (32.5)           | 8 (20.0)            |
| Grade II         | 6 (15.0)            | 6 (15.0)            |
| Grade III        | 1 (2.5)             | 6 (15.0)            |
| Grade IV         | 1 (2.5)             | 1 (2.5)             |

Figures denote number and (percent).

EDA = epidural analgesia. ITM = intrathecal morphine analgesia.  $p=0.31$ ;  $\chi^2$  for trends (df=4).

Grade I: Any deviation from the normal postoperative course without the need for pharmacological treatment or surgical, endoscopic and radiological interventions. Allowed therapeutic regimens are: drugs as antiemetics, antipyretics, analgetics, diuretics and electrolytes and physiotherapy. This grade also includes wound infections opened at the bedside.

Grade II: Requiring pharmacological treatment with drugs other than such allowed for grade I complications. Blood transfusions and total parenteral nutrition are also included.

Grade III: Requiring surgical, endoscopic or radiological intervention

Grade IV: Life-threatening complication requiring intermediate care/intensive care unit management

1  
2  
3  
4  
5  
6  
7  
8  
9  
10  
11  
12  
13  
14  
15  
16  
17  
18  
19  
20  
21  
22  
23  
24  
25  
26  
27  
28  
29  
30  
31  
32  
33  
34  
35  
36  
37  
38  
39  
40  
41  
42  
43  
44  
45  
46  
47  
48  
49  
50  
51  
52  
53  
54  
55  
56  
57  
58  
59  
60

Insert Figure 2 here

| Repeated measures ANOVA    |                       |                    |
|----------------------------|-----------------------|--------------------|
| Main effect between groups | Main effect over time | Interaction effect |
| $p = 0.22$                 | $p < 0.0001$          | $p = 0.34$         |

Figure 2. Illustration of EQ-5D weighted health state index in relation to occasion of measurement. Plots represent means and bars represent 95% confidence interval. Result of the repeated measures ANOVA from Day 0 - 42 assessment is presented. EDA = epidural analgesia; ITM = intrathecal morphine analgesia. No significant differences were observed in the EQ-5D health index between the two groups preoperatively.

1  
2  
3  
4  
5  
6  
7  
8  
9  
10  
11  
12  
13  
14  
15  
16  
17  
18  
19  
20  
21  
22  
23  
24  
25  
26  
27  
28  
29  
30  
31  
32  
33  
34  
35  
36  
37  
38  
39  
40  
41  
42  
43  
44  
45  
46

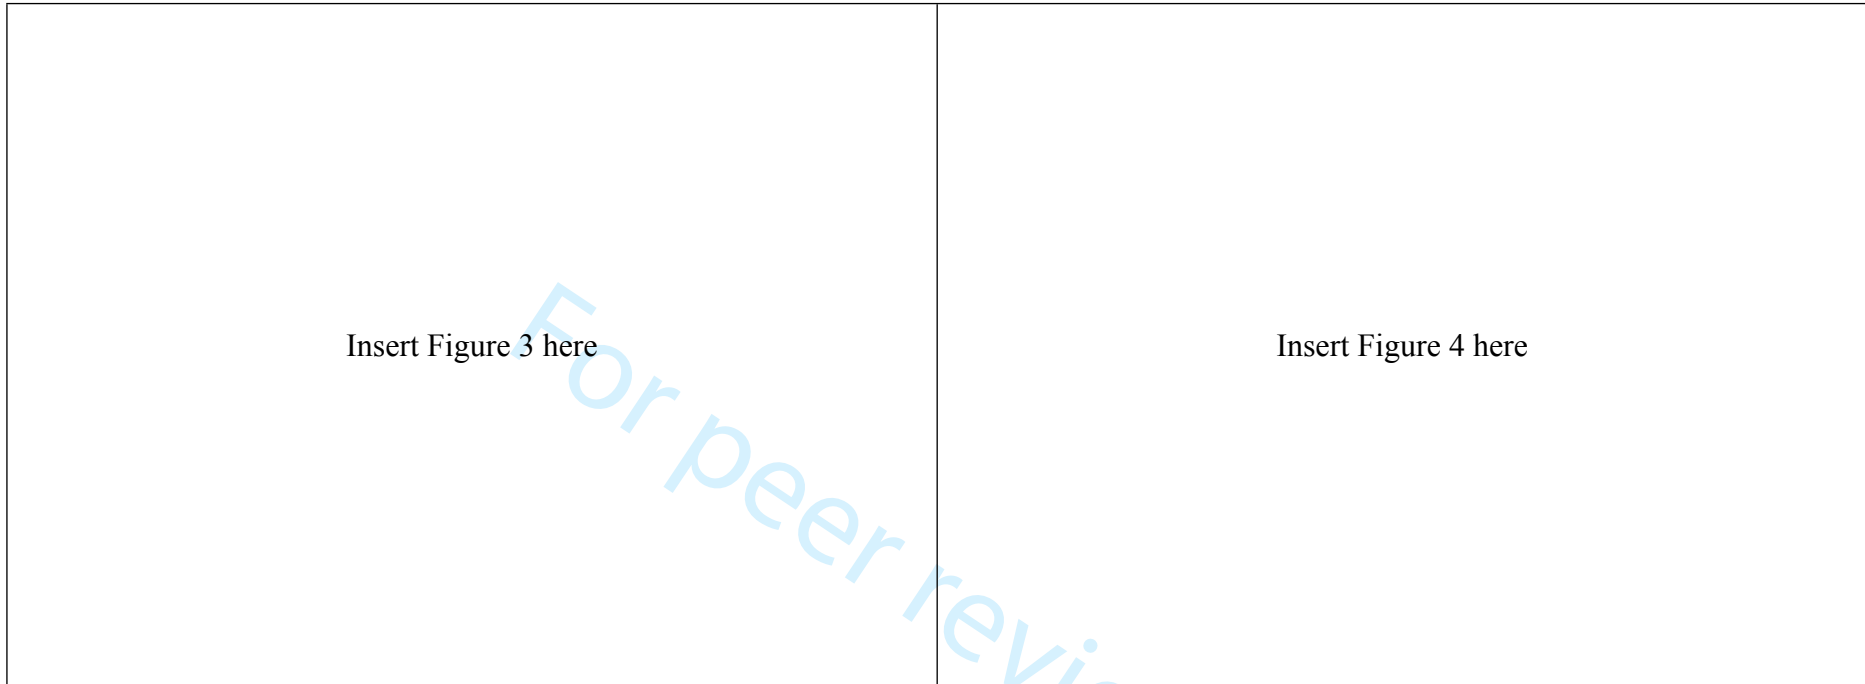

|                     | Repeated measures ANOVA    |                       |                    |
|---------------------|----------------------------|-----------------------|--------------------|
|                     | Main effect between groups | Main effect over time | Interaction effect |
| NRS at rest         | $p = 0.34$                 | $p < 0.001$           | $p < 0.0001$       |
| NRS at mobilization | $p = 0.08$                 | $p < 0.0001$          | $p < 0.0001$       |

|                     | Bonferroni post hoc tests, (p-value) |         |         |         |         |         |         |         |         |         |         |         |         |         |         |         |         |         |         |
|---------------------|--------------------------------------|---------|---------|---------|---------|---------|---------|---------|---------|---------|---------|---------|---------|---------|---------|---------|---------|---------|---------|
|                     | Day 0.3                              | Day 1.1 | Day 1.2 | Day 1.3 | Day 2.1 | Day 2.2 | Day 2.3 | Day 3.1 | Day 3.2 | Day 3.3 | Day 4.1 | Day 4.2 | Day 4.3 | Day 5.1 | Day 5.2 | Day 5.3 | Day 6.1 | Day 6.2 | Day 6.3 |
| NRS at mobilization | 0.01                                 | 0.06    | 0.01    | 0.44    | 1.00    | 1.00    | 1.00    | 1.00    | 1.00    | 1.00    | 1.00    | 1.00    | 1.00    | 1.00    | 1.00    | 1.00    | 1.00    | 1.00    | 1.00    |

Figure 3 and 4. Assessment of pain by means of a 10 graded numeric rating scale (NRS) at rest and at mobilization. Plots represent means and bars represent 95% confidence interval. Results of the repeated measures ANOVA and post hoc tests from Day 0 to the Day 6 are shown in the table below the diagrams. Assessments done from the evening of surgery and three times daily. Day 1.1, 1.2 and 1.3, respectively, represent the measurements performed in the morning, the afternoon and the evening on Day 1. EDA = epidural analgesia; ITM = intrathecal morphine analgesia.

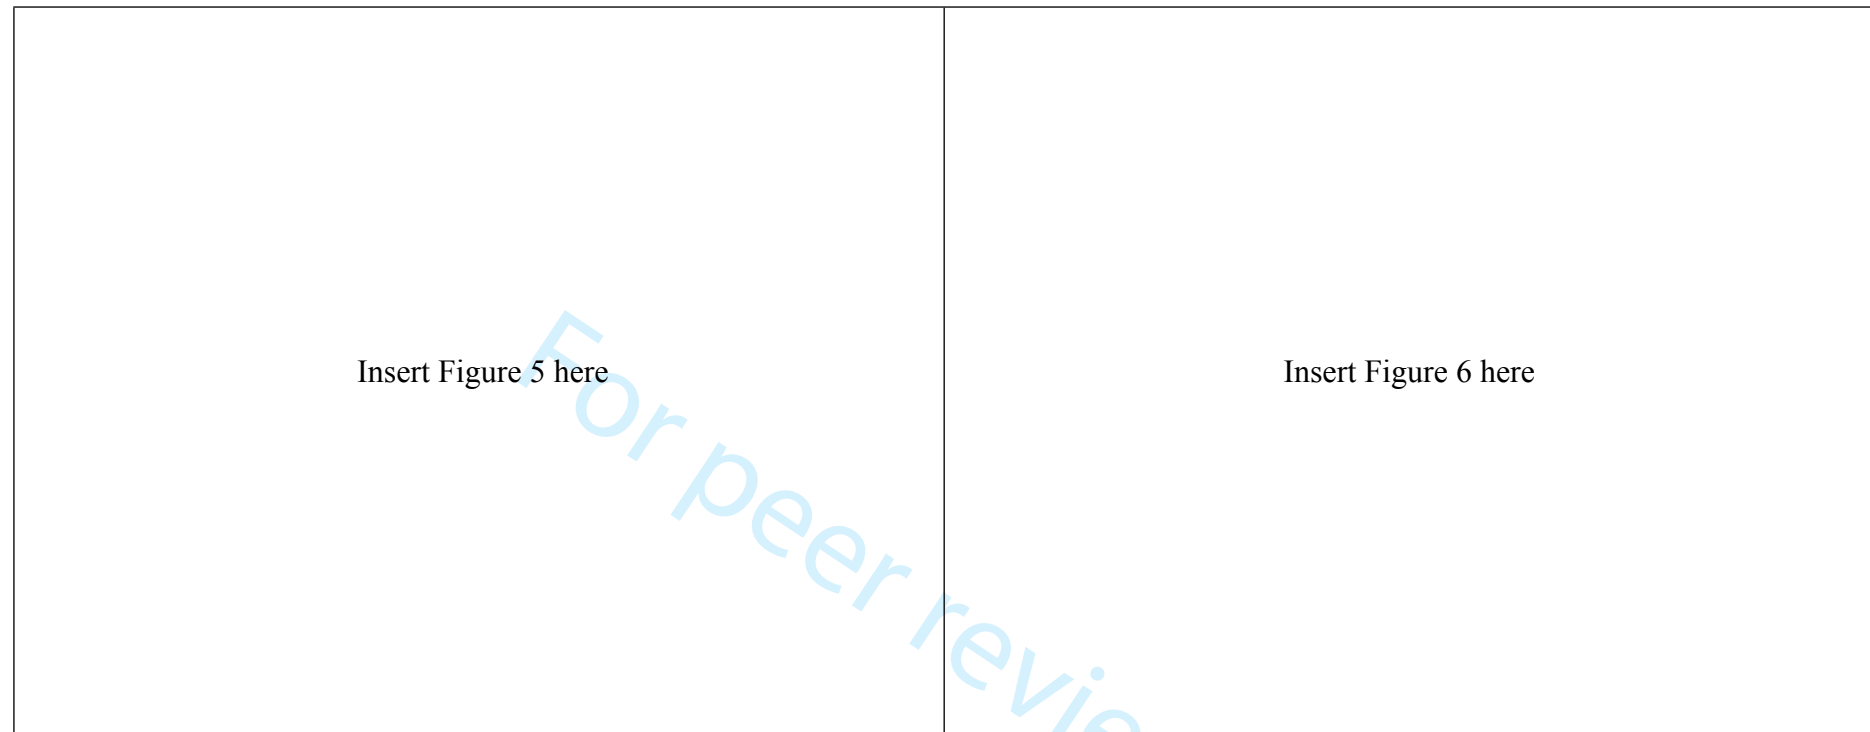

|                                    | Repeated measures ANOVA              |         |                       |       |       |                    |       |
|------------------------------------|--------------------------------------|---------|-----------------------|-------|-------|--------------------|-------|
|                                    | Main effect between groups           |         | Main effect over time |       |       | Interaction effect |       |
| Opioids (Equivalent morphine (mg)) | $p < 0.001$                          |         | $p < 0.0001$          |       |       | $p < 0.0001$       |       |
| DDD non-opioids                    | $p = 0.06$                           |         | $p < 0.0001$          |       |       | $p = 0.08$         |       |
|                                    | Bonferroni post hoc tests, (p-value) |         |                       |       |       |                    |       |
|                                    | Day 0                                | Day 1   | Day 2                 | Day 3 | Day 4 | Day 5              | Day 6 |
| Opioids                            | <0.0001                              | <0.0001 | <0.001                | 1.00  | 1.00  | 1.00               | 1.00  |
| DDD non-opioids                    |                                      |         |                       | 1.00  | 1.00  | 0.93               | 0.10  |

25  
26  
27  
28  
29  
30  
31  
32  
33  
34  
35  
36  
37  
38  
39  
40  
41  
42

Figure 5 and 6. Consumption of analgesics after surgery in relation to occasion of measurement. Plots represent means and bars represent 95% confidence interval. Results of the repeated measures ANOVA and post hoc tests from Day 0 to the Day 6 assessment for equivalent morphine given and for Day 3 to Day 42 for DDD non-opioids are presented in the table below the diagram. DDD = defined daily dose; EDA = epidural analgesia; ITM = intrathecal morphine analgesia.





Figure 1.

Figure 1

449x582mm (72 x 72 DPI)



Figure 2

228x228mm (96 x 96 DPI)

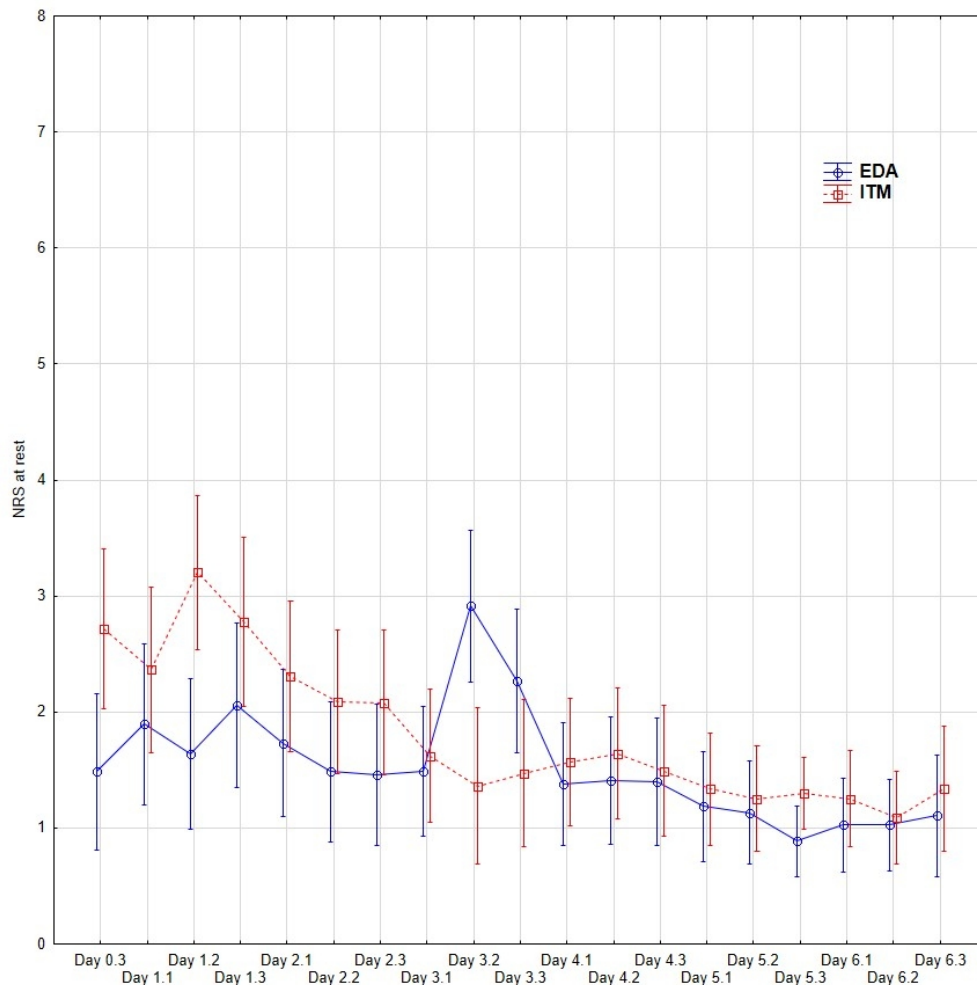

Figure 3

228x228mm (96 x 96 DPI)

1  
2  
3  
4  
5  
6  
7  
8  
9  
10  
11  
12  
13  
14  
15  
16  
17  
18  
19  
20  
21  
22  
23  
24  
25  
26  
27  
28  
29  
30  
31  
32  
33  
34  
35  
36  
37  
38  
39  
40  
41  
42  
43  
44  
45  
46  
47  
48  
49  
50  
51  
52  
53  
54  
55  
56  
57  
58  
59  
60

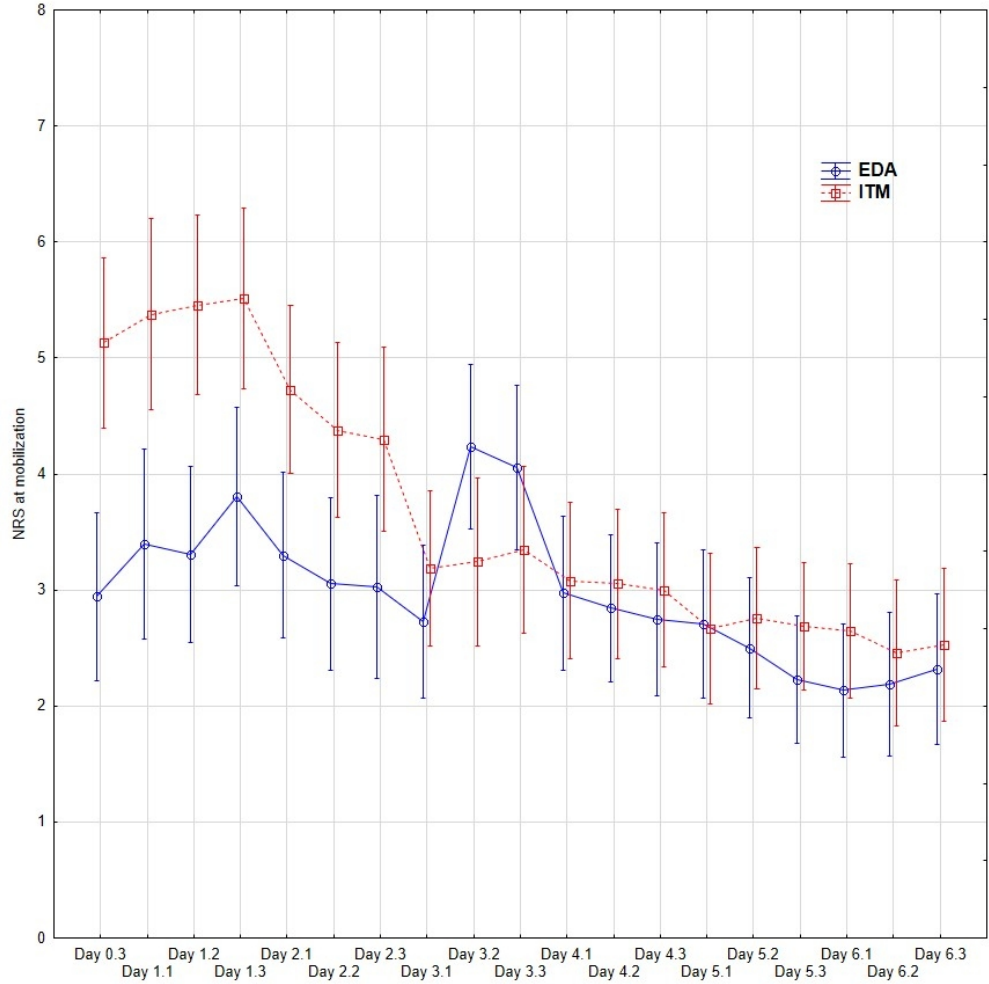

Figure 4

228x228mm (96 x 96 DPI)



Figure 5

228x228mm (96 x 96 DPI)

1  
2  
3  
4  
5  
6  
7  
8  
9  
10  
11  
12  
13  
14  
15  
16  
17  
18  
19  
20  
21  
22  
23  
24  
25  
26  
27  
28  
29  
30  
31  
32  
33  
34  
35  
36  
37  
38  
39  
40  
41  
42  
43  
44  
45  
46  
47  
48  
49  
50  
51  
52  
53  
54  
55  
56  
57  
58  
59  
60

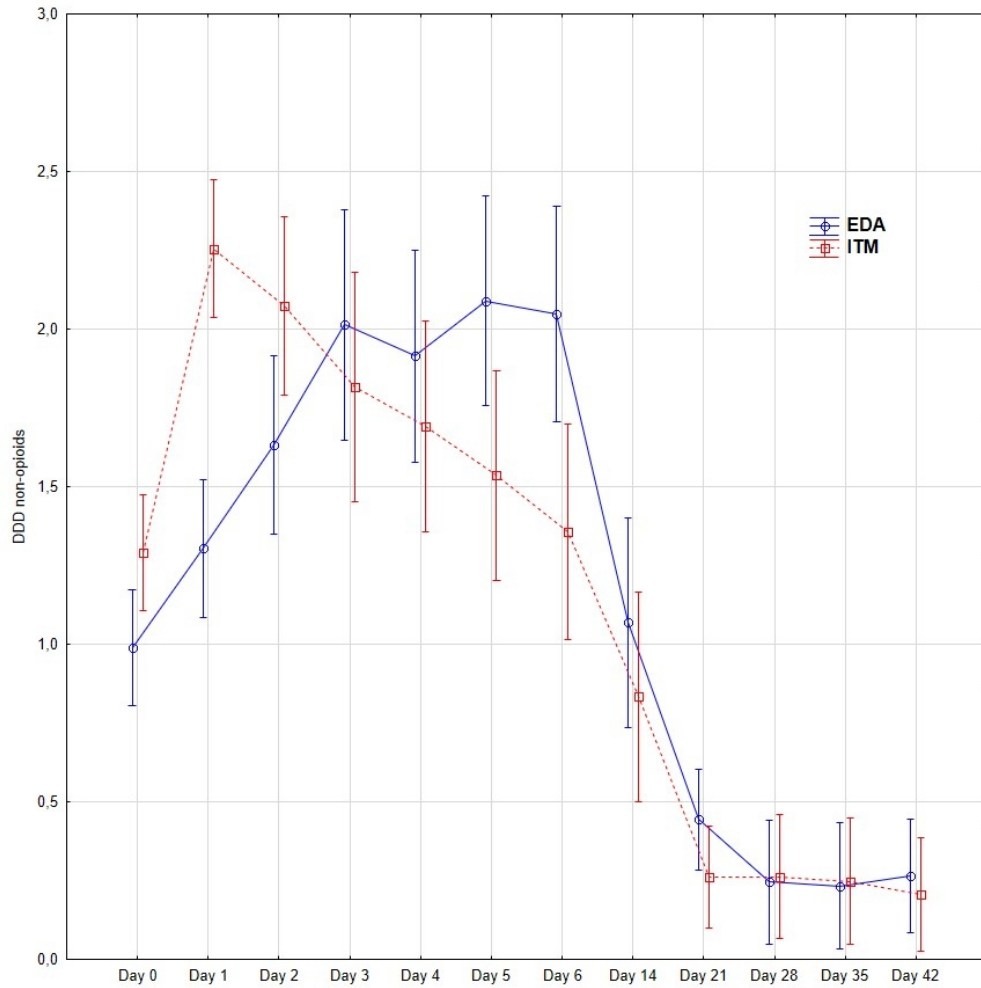

Figure 6

228x228mm (96 x 96 DPI)

# Reporting checklist for randomized trial.

Based on the CONSORT guidelines.

## Instructions to authors

Complete this checklist by entering the page numbers from your manuscript where readers will find each of the items listed below.

Your article may not currently address all the items on the checklist. Please modify your text to include the missing information. If you are certain that an item does not apply, please write "n/a" and provide a short explanation.

Upload your completed checklist as an extra file when you submit to a journal.

In your methods section, say that you used the CONSORT reporting guidelines, and cite them as:

Schulz KF, Altman DG, Moher D, for the CONSORT Group. CONSORT 2010 Statement: updated guidelines for reporting parallel group randomised trials

|                           |                     | Reporting Item                                                                                                    | Page Number |
|---------------------------|---------------------|-------------------------------------------------------------------------------------------------------------------|-------------|
| Title                     | <a href="#">#1a</a> | Identification as a randomized trial in the title.                                                                | 1           |
| Abstract                  | <a href="#">#1b</a> | Structured summary of trial design, methods, results, and conclusions                                             | 2           |
| Background and objectives | <a href="#">#2a</a> | Scientific background and explanation of rationale                                                                | 4           |
|                           | <a href="#">#2b</a> | Specific objectives or hypothesis                                                                                 | 4           |
| Trial design              | <a href="#">#3a</a> | Description of trial design (such as parallel, factorial) including allocation ratio.                             | 5           |
|                           | <a href="#">#3b</a> | Important changes to methods after trial commencement (such as eligibility criteria), with reasons                | Na          |
| Participants              | <a href="#">#4a</a> | Eligibility criteria for participants                                                                             | 5           |
|                           | <a href="#">#4b</a> | Settings and locations where the data were collected                                                              | 5           |
| Interventions             | <a href="#">#5</a>  | The experimental and control interventions for each group with sufficient details to allow replication, including | 5-6         |

|    |                        |                                                                                  |          |
|----|------------------------|----------------------------------------------------------------------------------|----------|
|    |                        | how and when they were actually administered                                     |          |
| 1  |                        |                                                                                  |          |
| 2  | Outcomes               | <a href="#">#6a</a> Completely defined prespecified primary and secondary        | 4-6      |
| 3  |                        | outcome measures, including how and when they were                               |          |
| 4  |                        | assessed                                                                         |          |
| 5  |                        |                                                                                  |          |
| 6  |                        |                                                                                  |          |
| 7  | Sample size            | <a href="#">#7a</a> How sample size was determined.                              | 7        |
| 8  |                        |                                                                                  |          |
| 9  |                        |                                                                                  |          |
| 10 |                        | <a href="#">#7b</a> When applicable, explanation of any interim analyses         | NA       |
| 11 |                        | and stopping guidelines                                                          |          |
| 12 |                        |                                                                                  |          |
| 13 | Randomization -        | <a href="#">#8a</a> Method used to generate the random allocation                | 5        |
| 14 | Sequence generation    | sequence.                                                                        |          |
| 15 |                        |                                                                                  |          |
| 16 |                        | <a href="#">#8b</a> Type of randomization; details of any restriction (such as   | 5        |
| 17 |                        | blocking and block size)                                                         |          |
| 18 |                        |                                                                                  |          |
| 19 | Randomization -        | <a href="#">#9</a> Mechanism used to implement the random allocation             | 5        |
| 20 | Allocation concealment | sequence (such as sequentially numbered containers),                             |          |
| 21 | mechanism              | describing any steps taken to conceal the sequence until                         |          |
| 22 |                        | interventions were assigned                                                      |          |
| 23 |                        |                                                                                  |          |
| 24 | Randomization -        | <a href="#">#10</a> Who generated the allocation sequence, who enrolled          | 5        |
| 25 | Implementation         | participants, and who assigned participants to                                   |          |
| 26 |                        | interventions                                                                    |          |
| 27 |                        |                                                                                  |          |
| 28 | Blinding               | <a href="#">#11a</a> If done, who was blinded after assignment to                | NA       |
| 29 |                        | interventions (for example, participants, care providers,                        |          |
| 30 |                        | those assessing outcomes) and how.                                               |          |
| 31 |                        |                                                                                  |          |
| 32 |                        | <a href="#">#11b</a> If relevant, description of the similarity of interventions | NA       |
| 33 |                        |                                                                                  |          |
| 34 | Statistical methods    | <a href="#">#12a</a> Statistical methods used to compare groups for primary      | 9        |
| 35 |                        | and secondary outcomes                                                           |          |
| 36 |                        |                                                                                  |          |
| 37 |                        | <a href="#">#12b</a> Methods for additional analyses, such as subgroup           | 9        |
| 38 |                        | analyses and adjusted analyses                                                   |          |
| 39 |                        |                                                                                  |          |
| 40 | Participant flow       | <a href="#">#13a</a> A diagram is strongly recommended. For each group,          | Figure 1 |
| 41 | diagram (strongly      | the numbers of participants who were randomly                                    |          |
| 42 | recommended)           | assigned, received intended treatment, and were                                  |          |
| 43 |                        | analysed for the primary outcome                                                 |          |
| 44 |                        |                                                                                  |          |
| 45 | Participant flow       | <a href="#">#13b</a> For each group, losses and exclusions after                 | Figure 1 |
| 46 |                        | randomization, together with reason                                              |          |
| 47 |                        |                                                                                  |          |
| 48 |                        |                                                                                  |          |
| 49 |                        |                                                                                  |          |
| 50 |                        |                                                                                  |          |
| 51 |                        |                                                                                  |          |
| 52 |                        |                                                                                  |          |
| 53 |                        |                                                                                  |          |
| 54 |                        |                                                                                  |          |
| 55 |                        |                                                                                  |          |
| 56 |                        |                                                                                  |          |
| 57 |                        |                                                                                  |          |
| 58 |                        |                                                                                  |          |
| 59 |                        |                                                                                  |          |
| 60 |                        |                                                                                  |          |



|    |                         |                      |                                                                                                                                                   |                 |
|----|-------------------------|----------------------|---------------------------------------------------------------------------------------------------------------------------------------------------|-----------------|
| 1  | Recruitment             | <a href="#">#14a</a> | Dates defining the periods of recruitment and follow-up                                                                                           | 5               |
| 2  |                         |                      |                                                                                                                                                   |                 |
| 3  |                         | <a href="#">#14b</a> | Why the trial ended or was stopped                                                                                                                | NA              |
| 4  |                         |                      |                                                                                                                                                   |                 |
| 5  | Baseline data           | <a href="#">#15</a>  | A table showing baseline demographic and clinical characteristics for each group                                                                  | Table 1         |
| 6  |                         |                      |                                                                                                                                                   |                 |
| 7  |                         |                      |                                                                                                                                                   |                 |
| 8  |                         |                      |                                                                                                                                                   |                 |
| 9  | Numbers analysed        | <a href="#">#16</a>  | For each group, number of participants (denominator) included in each analysis and whether the analysis was by original assigned groups           | Tables 1,2,4    |
| 10 |                         |                      |                                                                                                                                                   |                 |
| 11 |                         |                      |                                                                                                                                                   |                 |
| 12 |                         |                      |                                                                                                                                                   |                 |
| 13 |                         |                      |                                                                                                                                                   |                 |
| 14 |                         |                      |                                                                                                                                                   |                 |
| 15 | Outcomes and estimation | <a href="#">#17a</a> | For each primary and secondary outcome, results for each group, and the estimated effect size and its precision (such as 95% confidence interval) | 8, Figures 2-4  |
| 16 |                         |                      |                                                                                                                                                   |                 |
| 17 |                         |                      |                                                                                                                                                   |                 |
| 18 |                         |                      |                                                                                                                                                   |                 |
| 19 |                         |                      |                                                                                                                                                   |                 |
| 20 |                         | <a href="#">#17b</a> | For binary outcomes, presentation of both absolute and relative effect sizes is recommended                                                       | NA              |
| 21 |                         |                      |                                                                                                                                                   |                 |
| 22 |                         |                      |                                                                                                                                                   |                 |
| 23 |                         |                      |                                                                                                                                                   |                 |
| 24 | Ancillary analyses      | <a href="#">#18</a>  | Results of any other analyses performed, including subgroup analyses and adjusted analyses, distinguishing pre-specified from exploratory         | NA              |
| 25 |                         |                      |                                                                                                                                                   |                 |
| 26 |                         |                      |                                                                                                                                                   |                 |
| 27 |                         |                      |                                                                                                                                                   |                 |
| 28 |                         |                      |                                                                                                                                                   |                 |
| 29 | Harms                   | <a href="#">#19</a>  | All important harms or unintended effects in each group (For specific guidance see CONSORT for harms)                                             | 10, Table 4     |
| 30 |                         |                      |                                                                                                                                                   |                 |
| 31 |                         |                      |                                                                                                                                                   |                 |
| 32 |                         |                      |                                                                                                                                                   |                 |
| 33 | Limitations             | <a href="#">#20</a>  | Trial limitations, addressing sources of potential bias, imprecision, and, if relevant, multiplicity of analyses                                  | 11-12           |
| 34 |                         |                      |                                                                                                                                                   |                 |
| 35 |                         |                      |                                                                                                                                                   |                 |
| 36 |                         |                      |                                                                                                                                                   |                 |
| 37 | Interpretation          | <a href="#">#22</a>  | Interpretation consistent with results, balancing benefits and harms, and considering other relevant evidence                                     | 11-12           |
| 38 |                         |                      |                                                                                                                                                   |                 |
| 39 |                         |                      |                                                                                                                                                   |                 |
| 40 |                         |                      |                                                                                                                                                   |                 |
| 41 | Registration            | <a href="#">#23</a>  | Registration number and name of trial registry                                                                                                    | 2               |
| 42 |                         |                      |                                                                                                                                                   |                 |
| 43 | Protocol                | <a href="#">#24</a>  | Where the full trial protocol can be accessed, if available                                                                                       | Se Cover letter |
| 44 |                         |                      |                                                                                                                                                   |                 |
| 45 |                         |                      |                                                                                                                                                   |                 |
| 46 |                         |                      |                                                                                                                                                   |                 |
| 47 | Funding                 | <a href="#">#25</a>  | Sources of funding and other support (such as supply of drugs), role of funders                                                                   | 3               |
| 48 |                         |                      |                                                                                                                                                   |                 |
| 49 |                         |                      |                                                                                                                                                   |                 |

51 The CONSORT checklist is distributed under the terms of the Creative Commons Attribution License  
 52 CC-BY. This checklist can be completed online using <https://www.goodreports.org/>, a tool made by  
 53 the [EQUATOR Network](#) in collaboration with [Penelope.ai](#)  
 54

# BMJ Open

## The effect of intrathecal morphine and epidural analgesia on postoperative recovery after abdominal surgery for gynecologic malignancy. An open-label randomized trial.

|                                 |                                                                                                                                                                                                                                                                                                                                                                                                                                   |
|---------------------------------|-----------------------------------------------------------------------------------------------------------------------------------------------------------------------------------------------------------------------------------------------------------------------------------------------------------------------------------------------------------------------------------------------------------------------------------|
| Journal:                        | <i>BMJ Open</i>                                                                                                                                                                                                                                                                                                                                                                                                                   |
| Manuscript ID                   | bmjopen-2018-024484.R3                                                                                                                                                                                                                                                                                                                                                                                                            |
| Article Type:                   | Research                                                                                                                                                                                                                                                                                                                                                                                                                          |
| Date Submitted by the Author:   | 06-Jan-2019                                                                                                                                                                                                                                                                                                                                                                                                                       |
| Complete List of Authors:       | Kjohede, Preben; Linkopings universitet, Children and Women's Health, Department of Clinical and Experimental Medicine<br>Bergdahl, Olga; Vrinnevisjukhuset i Norrkoping, Department of Obstetrics and Gynecology<br>Borendal Wodlin, Ninnie; Linkopings Universitet Institutionen for klinisk och experimentell medicin, Dept. of Obstetrics and Gynecology<br>Nilsson, Lena; Region Ostergotland, Anesthesia and Intensive care |
| <b>Primary Subject Heading</b>: | Obstetrics and gynaecology                                                                                                                                                                                                                                                                                                                                                                                                        |
| Secondary Subject Heading:      | Anaesthesia, Surgery, Oncology                                                                                                                                                                                                                                                                                                                                                                                                    |
| Keywords:                       | Gynaecological oncology < GYNAECOLOGY, Quality in health care < HEALTH SERVICES ADMINISTRATION & MANAGEMENT, Adult surgery < SURGERY, Anaesthesia in oncology < ANAESTHETICS                                                                                                                                                                                                                                                      |
|                                 |                                                                                                                                                                                                                                                                                                                                                                                                                                   |

SCHOLARONE™  
Manuscripts

1  
2 *A Research Article entitled*

3  
4  
5  
6 ***The effect of intrathecal morphine and epidural analgesia on***  
7 ***postoperative recovery after abdominal surgery for gynecologic***  
8 ***malignancy. An open-label randomized trial.***  
9  
10  
11  
12  
13  
14  
15  
16

17 Authors:

18  
19  
20 Preben Kjølhed<sup>1</sup>, MD, PhD, Olga Bergdahl<sup>2</sup>, MD, Ninnie Borendal Wodlin<sup>1</sup>, MD,  
21  
22 PhD and Lena Nilsson<sup>3</sup>, MD, PhD.  
23  
24

25 Affiliations:

26  
27 <sup>1</sup> Children and Women's Health, Department of Clinical and Experimental Medicine, Linköping  
28 University, Linköping, Sweden

29  
30 <sup>2</sup> Department of Obstetrics and Gynecology, Vrinnevi Hospital, Norrköping, Sweden

31  
32 <sup>3</sup> Department of Anesthesiology and Intensive Care, and Department of Medical and Health  
33 Sciences, Linköping University, Linköping, Sweden.  
34  
35  
36  
37

38 Corresponding author:

39 Preben Kjølhed, MD, PhD  
40 Department of Obstetrics and Gynecology  
41 University Hospital  
42 S-581 85 Linköping  
43 Sweden  
44  
45 Phone: +46 101033187  
46  
47 E-mail: [Preben.Kjohlhede@liu.se](mailto:Preben.Kjohlhede@liu.se)  
48  
49  
50

51 Word count: 3439  
52  
53  
54  
55  
56  
57  
58  
59  
60

## Abstract

**Objectives:** We aimed to determine whether regional analgesia with intrathecal morphine (ITM) in an enhanced recovery program (ERAS) gives a shorter hospital stay with good pain relief and equal health-related quality of life (QoL) to epidural analgesia (EDA) in women after midline laparotomy for proven or assumed gynecological malignancies.

**Design:** An open-label, randomized, single center study.

**Setting:** A tertiary referral Swedish university hospital.

**Participants:** Eighty women, 18-70 years of age, ASA I and II, admitted consecutively to the department of Obstetrics and Gynecology.

**Interventions:** The women were allocated (1:1) to either the standard analgesic method at the clinic (EDA) or the experimental treatment (ITM). An ERAS protocol with standardized perioperative routines and standardized general anesthesia were applied. The EDA or ITM started immediately preoperatively. The ITM group received morphine, clonidine and bupivacaine intrathecally; the EDA group had an epidural infusion of bupivacaine, adrenalin and fentanyl.

**Primary and secondary outcome measures:** Primary endpoint was length of hospital stay (LOS). Secondary endpoints were QoL and pain assessments.

**Results:** The LOS was statistically significantly shorter for the ITM group compared with the EDA group (median (IQR) 3.3 (1.5-56.3) vs. 4.3 (2.2-43.2) days;  $p=0.01$ ). No differences were observed in pain assessment or QoL. The ITM group used postoperatively the first week significantly less opioids than the EDA group, (median (IQR) 20 mg (14-35 mg) vs. 81 mg (67-101 mg;  $p<0.0001$ ). No serious adverse events were attributed to ITM or EDA.

**Conclusions:** Compared with EDA, ITM is simpler to administer and manage, is associated with shorter hospital stay and reduces opioid consumption postoperatively with an equally good QoL. ITM is effective as postoperative analgesia in gynecological cancer surgery.

**Trial registration number:** Clinical Trials NCT02026687

**Keywords:** Regional analgesia; Gynecological malignancy; Laparotomy; Opioid consumption; Quality improvement

## ARTICLE SUMMARY

### STRENGTHS AND LIMITATIONS OF THIS STUDY

- This study evaluates quality improvement on postoperative recovery after gynecological cancer surgery in an enhanced recovery after surgery setting.
- The study is an open randomized controlled trial.
- The experimental treatment (intrathecal morphine) was compared with the standard care of postoperative analgesia (epidural analgesic) used in our setting.
- The objective was to compare the two analgesic methods in a clinical relevant multimodal context, not to find the appropriate doses or types of analgesic agent for each method.

### FUNDING STATEMENT

The study was supported financially by grants from the Swedish Society of Medicine (SLS-404711), the Medical Research Council of South-east Sweden (FORSS-8685), Linköping University and the Region Östergötland (LIO-356191, LIO-441781).

### COMPETING INTERESTS

The authors declare that they have no competing interests.

### DATA SHARING STATEMENT

No additional data are available.

## INTRODUCTION

Pain is an important component in the assessment of health-related quality of life (QoL). Besides the human suffering, insufficiently treated postoperative pain complicates mobilization, increases the risk for complications and might prolong hospitalization.

Regional analgesia with epidural analgesia (EDA) in abdominal surgery is recommended in most enhanced recovery after surgery (ERAS) protocols for use both during surgery and postoperatively.[1,2] Single-dose intrathecal morphine provide good analgesia during the first postoperative days after abdominal cancer surgery,[3-6] and improves the recovery after hysterectomy for benign conditions.[7,8] An additional analgesic effect can be obtained by adding the  $\alpha$ -adrenergic agonist clonidine intrathecally.[4,9,10] In surgery for malignant gynecological diseases intrathecal morphine has been less described, although Kara et al. [11] in 2012 reported reduced morphine consumption and no increase in side effects. A few randomized studies have compared single-dose intrathecal morphine with continuous EDA after major abdominal surgery, showing disputed results concerning pain relief and hospital stay.[12-14]

Based on the potential benefits of intrathecal morphine as an effective and technically simple applied postoperative analgesic we designed this randomized study to compare the effects of a single-dose intrathecal combined morphine and clonidine (ITM) with the standard of care in the hospital using EDA in an ERAS program for abdominal surgery for proven or assumed gynecological malignant tumors.

The aim of the study was to determine whether ITM when compared with EDA in an ERAS program, shorten hospital stay with a similar patient experienced QoL.

## MATERIAL AND METHODS

We conducted an open-label, randomized, controlled, single center study in accordance with Good Clinical Practice guidelines.[15] From March 2014 to January 2016 all women who were admitted to the department of Obstetrics and Gynecology, University Hospital, Linköping, Sweden due to a proven or assumed gynecological abdominal malignancy were eligible for the study. Women 18 to 70 years, World Health Organization (WHO) performance status < 2, American Society of Anesthesiologists (ASA) score < 3 and speaking Swedish fluently were included. Exclusion criteria were contraindications against regional analgesia, physical or psychiatric disability and surgery where pain could not be expected to be controlled by the regional analgesia. Oral and written informed consent was obtained from all participants.

At the preoperative visit the women were allocated to ITM and EDA, 1:1, from a computer-generated randomization code,[16] using sealed opaque envelopes. The participant was informed about the allocation.

Surgery was conducted through a midline laparotomy with the preoperative intention to obtain macroscopically radical tumor resection. If this was not possible the tumor burden was either to be reduced to the minimal residual tumor (less than 1 cm in size) or samples were to be obtained, preferably by salpingo-oophorectomy, in order to establish the histopathological diagnosis. Board-certified gynecological oncologists performed the surgery. The surgical technique used was at the discretion of the surgeon.

All women received thrombosis prophylaxis (tinzaparin 4500 anti-Xa IE subcutaneously) once daily for 28 days beginning the evening before the surgery, and prophylactic antibiotics (1.5 gram cefuroxime and 1.0 gram metronidazole intravenously (iv.) as a single dose) before surgery start.

All women received a standardized premedication with paracetamol 1995 mg. The allocated intervention of regional analgesic was applied prior to commencing the general anesthesia. The experimental treatment group (the ITM) had an intrathecal combination of a single dose isobar bupivacaine 15 mg, morphine 0.2 mg and clonidine 75µg, preferably through a 25G spinal needle. The EDA group had the standard EDA regime used in the hospital. The EDA was performed by a low thoracic puncture. The epidural infusion was started after induction of the general anesthesia but before surgery by a bolus dose of fentanyl 50-100 µg and a bolus from a mixture of bupivacaine 2.4 mg/ml, adrenalin 2.4 µg/ml and fentanyl 1.8 µg/ml. The same mixture was used as a continuous infusion, typically 4-8 ml/h, throughout surgery.

General anesthesia was standardized in both groups: induction with fentanyl and propofol, intubation facilitated with rocuronium and maintenance with sevoflurane. Fentanyl and rocuronium was repeated if needed. All patients had a gastric tube and an indwelling urinary catheter. The

1  
2 gastric tube was removed before waking the patient up. Local anesthetic (40 ml bupivacaine 2.5  
3 mg/ml) was injected prefascially and subcutaneously in the abdominal wall in the area of the skin  
4 incision.  
5  
6

7 After the initial monitoring at the postoperative care unit, the postoperative pain management  
8 including surveillance of possible opioid side effects and neurological complications took place at  
9 the gynecological ward and followed the routines outlined by the Swedish Society of  
10 Anesthesiology and Intensive Care.[17]  
11  
12

13  
14 The women in the ITM group received oral paracetamol 1330 mg and diclofenac 50 mg, both  
15 three times daily started on the day of surgery. Oxycodone 10-20 mg twice daily was added on the  
16 first postoperative day.  
17  
18

19 For the EDA group, a continuous epidural infusion of a mixture of bupivacain 1 mg/ml +  
20 adrenalin 2µg/ml + fentanyl 2 µg/ml including the possibility of additional patient-controlled bolus  
21 doses was started postoperatively at the postoperative care unit and continued until the morning of  
22 the third postoperative day. The infusion rate, normally 4-8 ml/h, and bolus doses, normally 2 ml,  
23 were decided on by the responsible physician. The patients also had oral paracetamol 1330 mg three  
24 times daily, starting on the day of surgery. Oral oxycodone 10-20 mg twice daily and diclofenac 50  
25 mg three times daily were added in the morning of the third postoperative day before removal of the  
26 epidural catheter according to the guidelines.[17]  
27  
28  
29  
30  
31  
32

33 Rescue opioids were the same for both groups; iv. morphine, 0.5-1 mg, iv. or oxycodone 5 mg  
34 orally was given if needed. In case of obvious pain relieving failure with the ITM or EDA iv.  
35 patient-controlled analgesia with morphine was started.  
36  
37

38 To quantify the amount of non-opioid analgesics given the defined daily dose (DDD)  
39 methodology was used.[18] All opioids, independent of administration route and including the ITM  
40 and the EDA, were converted to an equivalent iv. morphine dose.[19,20]  
41  
42

43 A numerical rating scale (NRS) 0-10 was used to assess the pain three times daily (8 am, 4  
44 pm, 10 pm) at rest and at mobilization, i.e. when moving out of bed, raising both legs when in bed  
45 or when giving a strong cough.  
46  
47

48 The standardized criteria for discharge were: the patient was mobilized, tolerated a normal  
49 diet, had sufficient pain relief with oral analgesics (NRS  $\leq$  4), showed no signs of mechanical bowel  
50 obstruction and had voided spontaneously with less than 150 ml residual urine. If the last criterion  
51 was not met, the woman went home with the catheter, which was removed polyclinically. The  
52 discharge criteria were checked twice daily. The decision on discharge was made according to the  
53 medical criteria but could be prolonged by social or other practical, personal conditions. Both the *de*  
54 *facto* hospital stay (LOS) and the length of the stay until the discharge criteria were met were  
55 calculated.  
56  
57  
58  
59  
60



1  
2 The research nurse had telephone contact with the participants the day after discharge and  
3 then once a week until six weeks postoperatively. Adverse events were registered and graded  
4 according to the Clavien-Dindo classification.[21] The study was completed after the six-week  
5 contact.  
6  
7

8  
9 The QoL was assessed by two commonly used validated generic QoL forms. The EQ-5D form  
10 was completed preoperatively, daily during the first week after surgery, then once weekly until the  
11 six-week postoperative visit. [22] The Short Form – 36 Health Survey (SF-36) form was completed  
12 preoperatively (baseline) and six weeks postoperatively.[23]  
13  
14

### 15 **Trial outcomes**

16  
17 The primary endpoint was the de facto duration of hospital stay (LOS). Secondary outcome  
18 measurers were QoL and pain assessments. As secondary post hoc outcomes we also registered the  
19 analgesic consumption, time to meet standardized discharge criteria, proportion of women  
20 discharged on the third postoperative day and adverse events.  
21  
22

### 23 **Patient involvement**

24  
25 Patients were not involved in the study design or conduct of the study. By assessing QoL as part of  
26 the protocol, the patients reported a surrogate measure of the burden of the intervention.  
27  
28

### 29 **Ethical approval**

30  
31 The study was approved by the Regional Ethics Board of Linköping University (D.nr. 2013/185-31,  
32 approval date 29 August 2013), the Swedish Medical Products Agency (Eu-nr. 2013-001873-25;  
33 D.nr. 5.1-2013-50334, approval date 1 August 2013) and monitored by an independent monitor.  
34  
35

### 36 **Statistics**

37  
38 Sample size calculation was based on the primary outcome endpoint. From our earlier studies on  
39 abdominal hysterectomy using ITM in an ERAS setting [7] the standard deviation for LOS was  
40 0.75 days. Providing that the minimum clinical relevant difference in hospital stay between the  
41 groups was 0.5 days, each group should consist of 40 women including a 10% dropout rate in order  
42 to show statistical significance at a 5% level (two-sided test) with an 80% power.  
43  
44

45  
46 Data are presented as median (inter quartile range), mean and (95% confidence interval) or  
47 number (percent).  $\chi^2$  tests and Fisher's exact tests were used to analyze categorical data and Mann-  
48 Whitney U-tests and Wilcoxon matched pair tests for continuous data.  
49  
50

51  
52 A repeated measures analysis of variance (ANOVA) was used to analyze data measured on  
53 more occasions. When  $p \leq 0.10$  in the analysis of the main effect between groups in the repeated  
54 measures ANOVA, the pairwise associations between groups on each single occasion of  
55 measurement were analyzed using the Bonferroni post hoc test.  
56  
57  
58  
59  
60

1  
2 The significance level was set at  $p < 0.05$ . The statistical tests were two-tailed. All analyses  
3  
4 were carried out according to intention-to-treat principles using Statistica v13.2 (Dell Software, 5  
5 Polaris Way, Aliso Viejo, CA 92656, USA).  
6  
7  
8  
9  
10  
11  
12  
13  
14  
15  
16  
17  
18  
19  
20  
21  
22  
23  
24  
25  
26  
27  
28  
29  
30  
31  
32  
33  
34  
35  
36  
37  
38  
39  
40  
41  
42  
43  
44  
45  
46  
47  
48  
49  
50  
51  
52  
53  
54  
55  
56  
57  
58  
59  
60

For peer review only

## RESULTS

The description of the selection and the randomization of the study population is presented in Figure 1. Forty women were chosen to receive EDA and 40 to receive ITM. One woman in each group did not receive any regional analgesia and one woman had ITM instead of EDA based on a mistake by the attending anesthesiologist.

The descriptive and demographic data are shown in Table 1. The clinical surgical and anesthesiological data are presented descriptively in Table 2. None of the differences between the two treatment groups were considered to be of clinical significance.

In 20% the final diagnosis postoperatively was benign, most often showing a benign ovarian tumor or a large uterine fibroid. The benign diseases were evenly distributed between the two groups.

The LOS was statistically significantly shorter for the ITM group compared with the EDA group (median (IQR) 3.3 (3.1-4.8) vs. 4.3 (3.4-5.2) days;  $p=0.01$ ). The time to meet standardized discharge criteria was significantly shorter in the ITM group compared with the EDA group (median (IQR) 3.0 (2.5-3.5) vs. 4.0 (3.5-4.5) days;  $p<0.001$ ). Significantly more women in the ITM group were discharged from the hospital on the third day (25 women (62.5%) in the ITM group vs. 12 (30%) in the EDA group, ( $p=0.004$ ).

The QoL parameters as measured by the EQ-5D, day-by-day, presented no statistically significant difference in health index between the two groups (Figure 2). Neither did the SF-36 show any statistically significant differences in the difference of baseline and 42-days assessments in any of the subscales or summary scores between the groups (Table 3). The role physical and the physical component summary score had not recovered to baseline level in either of the two groups after six weeks whereas the mental health and the mental component summary score showed a significant improvement after six weeks compared with the baseline assessment in the ITM group.

There was no significant difference in the overall assessment of pain (NRS) between the groups (Figure 3 and 4). The two groups showed different patterns in the NRS ratings as indicated by the significant interaction effects. The post hoc tests showed that the NRS ratings were significantly higher in the ITM group during the first two days at mobilization, whereas the EDA group scored significantly higher both at rest and at mobilization on day three when the EDA catheter was removed. The ITM group had a significantly lower total consumption of opioids than the EDA group whereas the use of non-opioids was similar in the two groups (Figure 5 and 6). The comparison of the non-opioids first started on Day 3 when the protocol allowed equal administration of per oral analgesics for the EDA and ITM groups. Postoperatively, during day 0 to day 6 the total consumption of opioids were median (IQR) 20 mg (14-35 mg) in the ITM group compared with 81 mg (67-101 mg) in the EDA group ( $p<0.0001$ ).

1  
2 The EDA failed in four women (10%) and ITM analgesia in one (2.5%). These women had  
3 either a new EDA in the post-anesthesia care or received patient-controlled morphine iv. One  
4 accidental dural puncture occurred in the EDA group. No post-dural puncture headache or  
5 anesthesiological adverse effects were observed in either of the groups. The perioperative adverse  
6 events graded according to the Clavien-Dindo classification in the two groups did not differ  
7 significantly (p=0.31) as shown in Table 4.  
8  
9  
10  
11  
12  
13  
14  
15  
16  
17  
18  
19  
20  
21  
22  
23  
24  
25  
26  
27  
28  
29  
30  
31  
32  
33  
34  
35  
36  
37  
38  
39  
40  
41  
42  
43  
44  
45  
46  
47  
48  
49  
50  
51  
52  
53  
54  
55  
56  
57  
58  
59  
60

For peer review only

## DISCUSSION

The study showed that a single-dose of intrathecal morphine used as postoperative analgesia compared with epidural analgesia gives advantages in abdominal gynecological cancer surgery in regard to the length of hospital stay, the time to meet the standardized discharge criteria and lower consumption of opioids postoperatively. A substantially higher proportion of women with ITM was discharged on the third postoperative day with an evenly reported health-related QoL and assessment of pain as women with EDA. A key point of an ERAS protocol is simplicity and a single intrathecal injection is simpler than a continuous epidural requiring ongoing management and monitoring. We regard ITM as a quality improvement from the perspective of both the patients and the health care.

The strengths of this trial are the randomized design, the unanimous ERAS and postoperative surveillance of the patients in the gynecological ward, the assessment of pain at rest and during mobilization, and the active use of rescue analgesics on demand. For obvious reasons the interventions could not be blinded for the participants or the staff. This might be a source of bias, but we believe that the potential influence of such bias will be limited and unavoidable in the study design used. A limitation for generalization of the results is the single center design. The ERAS concept is well established in daily clinical work and therefore the results can only be generalized to facilities with similar clinical standards and only to units that manage patients with regional analgesia. The two methods of regional analgesia may not be comparable in giving potentially equivalent analgesia with the dosage and preparation used. However, our objective was to compare the two analgesic methods in a clinical context, not to find the appropriate doses or types of analgesic agent for each method. Therefore, we selected conventional doses of the medications.

The use of intrathecal opioids requires close monitoring of sedation and respiratory rate for 12 hours. The nurses on the gynecological ward were educated regarding complications after ITM with special regard to late respiratory depression and the surveillance followed strict national recommendations. Intrathecal morphine is used in approximately two-thirds of Swedish gynecological units in connection with abdominal hysterectomy having a continued observation on the regular gynecological ward after an initial period of 2-6 hours in a postoperative care unit.[24] The intrathecal morphine dose 0.2 mg was chosen with the purpose of giving adequate analgesia at a risk of respiratory depression that equals systemic opioid analgesia.[25] Following abdominal hysterectomy there is no benefit from increasing the morphine dose over 0.2 mg.[26] The  $\alpha$ -agonist clonidine possesses an anti nociceptive effect from receptors located in the central nervous system. The addition of clonidine to intrathecal opioids further prolongs postoperative analgesia.[10]

The *de facto* duration of hospital stay was shorter in the ITM group. A reduction of hospital stay with one day has clinical relevance for both the patient and the health care system. A similar

1  
2 short length of stay has recently been reported from other ERAS programs for gynecological  
3 cancer.[27-29] Wijk et al.[27] used an analgesic regimen based on oral paracetamol and diclofenac  
4 and over 90% of the patients did not need systemic opioids from the day after surgery. Like our  
5 study, they used standardized discharge criteria. It is important to analyze when discharge criteria  
6 are fulfilled, as they are robust and generalizable. The length of hospital stay is often influenced by  
7 context-specific social factors.  
8  
9

10  
11  
12 In this study, we compared two multimodal analgesic regimens considered clinically relevant.  
13 For that reason, we aimed to make each regimen as optimal as possible. As a consequence, there  
14 were differences in non-opioids as well as opioid regimens until the epidural catheter was removed.  
15 Only rescue opioids were equal for both groups. Thus, the aim was not to compare the intrathecal  
16 and the epidural routes per se.  
17  
18

19  
20  
21 Multimodal analgesic regime minimizing opioid use has been shown to enhance  
22 recovery.[2,30] ITM has become a well-documented component in several ERAS protocols [29,  
23 31-34] and a protocol for a systematic review of ITM in abdominal and thoracic surgery patients  
24 has recently been published.[35] Despite the higher rating of NRS at mobilization during the first  
25 few days in the ITM group the consumption of opioids was nearly three times lower in the same  
26 time period compared with the EDA group, and the QoL index did not differ between the groups.  
27 This may imply that the women in the ITM group were as satisfied as the EDA group with their  
28 pain management, and the difference in NRS rating at mobilization was less clinically significant.  
29 The study included only ASA class I-II patients. For patients with more severe comorbidity the  
30 EDA regimen could be favorable as it offers a better early analgesia that especially patients at risk  
31 for complications could benefit from. A study on abdominal hysterectomy for endometrial cancer  
32 showed that women without EDA ceased opioid analgesia earlier than those women who had an  
33 EDA,[36] indicating a possible overuse of opioids in EDA. An earlier removal of the EDA catheter,  
34 for example after 48 hours, is a possible development of the EDA regimen. Prior to this trial, the  
35 standard praxis in our department was removal of the EDA catheter on the third day. Consequently,  
36 we studied the ITM against this regime. The difference in DDD of non-opioids seen until the third  
37 postoperative day was due to the protocol demand and the clinical routine in the hospital that  
38 diclofenac was not allowed in the EDA group until the EDA catheter was removed. The uneven use  
39 of diclofenac in the groups during the first three postoperative days may be seen as a weakness of  
40 the study. However, the DDD of non-opioids raised from day 1 to day 3 in the EDA group by using  
41 diclofenac in some patients against the study protocol and the clinical routines in the department. It  
42 is therefore less likely that the difference in DDD of non-opioids can explain the significant  
43 difference in opioids. In spite of the addition of diclofenac and consequently an increased DDD on  
44 the third postoperative day, the women in the EDA group rated the NRS at rest and at mobilization  
45  
46  
47  
48  
49  
50  
51  
52  
53  
54  
55  
56  
57  
58  
59  
60

1  
2 higher than the ITM women. Our EDA regimen including complementary analgesics was obviously  
3 not optimal in preventing breakthrough pain in connection with terminating the epidural infusion.  
4 The opioid sparing effect of ITM has been demonstrated in a study analyzing the first 48  
5 postoperative hours.[37] Our study might indicate an even longer benefit.  
6  
7

8  
9 In order to increase the patient-oriented focus on recovery we used two generic QoL forms to  
10 assess the patient-reported outcome of the health status. The EQ-5D was used to determine the  
11 short-term recovery day-by-day, whereas the SF-36 was used for a longer-term assessment. The  
12 short-term recovery in QoL did not seem to differ between the two regimes but at the longer term,  
13 the ITM seemed to give more pronounced advantages than EDA in the recovery of the mental  
14 health. The clinical importance of this remains unclear and merits further exploration. To the best of  
15 our knowledge, there is no condition-specific patient-reported outcome form for our patient group.  
16 Although there is no evidence of content validity for the EQ-5D or SF-36 for the specific patient  
17 group in this study, they are widely used and allow comparisons with population norms. A new  
18 form of the EQ-5D, EQ-5D-5L, has been developed with the aim to better capture smaller health  
19 changes.[38] At the time of the study there was no Swedish value set available for EQ-5D-5L.  
20  
21

22  
23 Severe complications after EDA and ITM are rare but still the indication for the regional  
24 analgesia should always be considered individually. In this trial no severe complications attributed  
25 to the regional analgesia occurred and the adverse events seemed to be equally distributed between  
26 the groups. However, the trial was not powered to detect a statistical difference in adverse events.  
27  
28

29  
30 In conclusion, ITM given in an ERAS program seems to be safe, simple to administer and  
31 effective as postoperative analgesia and gives quality advantages concerning the postoperative  
32 recovery in gynecological abdominal cancer surgery.  
33  
34  
35  
36  
37  
38  
39  
40  
41  
42  
43  
44  
45  
46  
47  
48  
49  
50  
51  
52  
53  
54  
55  
56  
57  
58  
59  
60

## ACKNOWLEDGEMENTS

The research nurses Åsa Rydmark Kersley, Linda Shosholli and Gunilla Gagnö are thanked for their invaluable dedicated work and support during the study.

For peer review only



**REFERENCES**

1. Nygren J, Thacker J, Carli F, et al. Guidelines for perioperative care in elective rectal/pelvic surgery: Enhanced Recovery After Surgery (ERAS®) Society recommendations. *Clin Nutr* 2012;31:801-16.
2. Feldheiser A, Aziz O, Baldini G, et al. Enhanced recovery after surgery (ERAS) for gastrointestinal surgery, part 2: consensus statement for anaesthesia practice. *Acta Anaesthesiol Scand* 2016;60:289–334.
3. Devys JM, Mora A, Plaud B, et al. Intrathecal + PCA morphine improves analgesia during the first 24 hr after major abdominal surgery compared to PCA alone. *Can J Anesth* 2003;50:355-61.
4. Andrieu G, Roth B, Ousmane L, et al. The efficacy of intrathecal morphine with or without clonidine for postoperative analgesia after radical prostatectomy. *Anesth Analg* 2009;108:1954-7.
5. Sakowska M, Docherty E, Linscott D, et al. A change in practice from epidural to intrathecal morphine analgesia for hepato-pancreato-biliary surgery. *World J Surg* 2009;33:1802-8.
6. Bujedo BM, Santos SG, Azpiazu AU. A review of epidural and intrathecal opioids used in the management of postoperative pain. *J Opioid Manag* 2012;8:177-92.
7. Borendal Wodlin N, Nilsson L, Kjølhed P. The impact of mode of anaesthesia on postoperative recovery from fast-track abdominal hysterectomy: a randomised clinical trial. *BJOG* 2011;118:299-308.
8. Kroon U-B, Rådström M, Hjelthe C, et al. Fast-track hysterectomy: A randomised, controlled study. *Eur J Obstet Gynecol Reprod Biol* 2010;151:203-7.
9. Engelman E, Marsala C. Efficacy of adding clonidine to intrathecal morphine in acute postoperative pain: meta-analysis. *Br J Anaesth* 2013;110:21-7.
10. Sites BD, Beach M, Biggs R, et al. Intrathecal clonidine added to a bupivacaine-morphine spinal anesthetic improves postoperative analgesia for total knee arthroplasty. *Anesth Analg*. 2003;96:1083-8.
11. Kara I, Apiliogullari S, Oc B, et al. The effects of intrathecal morphine on patient-controlled analgesia, morphine consumption, postoperative pain and satisfaction scores in patients undergoing gynaecological oncological surgery. *J Int Med Res* 2012;40:666-72.
12. De Pietri L, Siniscalchi A, Reggiani A, et al. The use of intrathecal morphine for postoperative pain relief after liver resection: a comparison with epidural analgesia. *Anesth Analg* 2006;102:1157-63.

13. Koea JB, Young Y, Gunn K. Fast track liver resection: the effect of a comprehensive care package and analgesia with single dose intrathecal morphine with gabapentin or continuous epidural analgesia. *HPB Surgery* 2009;2009:271986.
14. Vercauteren M, Vereecken K, La Malfa M, et al. Cost-effectiveness of analgesia after Caesarean section. A comparison of intrathecal morphine and epidural PCA. *Acta Anaesthesiol Scand* 2002;46:85-9.
15. International Conference on Harmonisation of technical requirements for registration of pharmaceuticals for human use. Good Clinical Practice. Available online at: <http://ichgcp.net/>. (Accessed April 28; 2018).
16. Simple Interactive Statistical Analysis. Allocation. Available online at: <http://www.quantitativeskills.com/sisa/>. (Accessed April 28; 2018).
17. Svensk Förening för Anestesi och Intensivvård. Postoperative analgesia (In Swedish). Available online at: <https://sfai.se/riktlinje/medicinska-rad-och-riktlinjer/anestesi/postoperativ-smartlindring/>. (Accessed April 28; 2018).
18. WHO Collaborating Centre for Drug Statistics Methodology. ATC/DDD Index 2017. Available online at: [https://www.whocc.no/atc\\_ddd\\_index/](https://www.whocc.no/atc_ddd_index/). (Accessed April 28; 2018).
19. Loper K, Ready B, Downey M, et.al. Epidural and intravenous fentanyl infusions are clinically equivalent after knee surgery. *Anest Analg* 1990;70:72-5.
20. Caraceni A, Hanks G, Kaasa S, et al. Use of opioid analgesics in the treatment of cancer pain: evidence-based recommendations from the EAPC. *Lancet Oncol* 2012;13:e58-68.
21. Dindo D, Demartines N, Clavien PA. Classification of surgical complications. A new proposal with evaluation in a cohort of 6336 patients and results of a survey. *Ann Surg* 2004;240:206-13.
22. The EuroQol Group. EuroQol – a new facility for the measurement of health-related quality of life. *Health Policy* 1990;16:199-208.
23. Sullivan M, Karlsson J, Ware JE. The Swedish SF-36 Health Survey I. Evaluation of data quality, scaling assumptions, reliability and construct validity across general populations in Sweden. *Soc Sci Med* 1995;41:1349-58.
24. Hein A, Gillis-Haegerstrand C, Jakobsson J. Neuraxial opioids as analgesia in labour, caesarean section and hysterectomy: A questionnaire survey in Sweden. Version 2. *F1000Research* 2017;6:133.
25. Gehling M, Tryba M. Risks and side-effects of intrathecal morphine combined with spinal anaesthesia: a meta-analysis. *Anaesthesia* 2009;64:643-51.

- 1
- 2 26. Hein A, Rösblad P, Gillis-Haegerstrand C, et al. Low dose intrathecal morphine effects on
- 3 post-hysterectomy pain: a randomized placebo-controlled study. *Acta Anesth Scand*
- 4 2012;56:102-9.
- 5
- 6
- 7 27. Wijk L, Franzén K, Ljungqvist O, et al. Enhanced Recovery after Surgery Protocol in
- 8 Abdominal Hysterectomies for Malignant versus Benign Disease. *Gynecol Obstet Invest*
- 9 2016;81:461-7.
- 10
- 11
- 12 28. Carter J. Fast-track surgery in gynaecology and gynaecologic oncology: a review of a rolling
- 13 clinical audit. *ISRN Surg* 2012;2012:368014.
- 14
- 15 29. Dickson EL, Stockwell E, Geller MA, et al. Enhanced recovery program and length of stay
- 16 after laparotomy on a gynecologic oncology service: a randomized controlled trial. *Obstet*
- 17 *Gynecol* 2017;129:355-62.
- 18
- 19
- 20 30. Nelson G, Altman AD, Nick A, et al. Guidelines for postoperative care in
- 21 gynecologic/oncology surgery: Enhanced Recovery After Surgery (ERAS®) Society
- 22 recommendations — Part II. *Gynecol Oncol* 2016;140:323-32.
- 23
- 24 31. Khalil A, Ganesh S, Hughes C, et al. Evaluation of the enhanced recovery after surgery
- 25 protocol in living liver donors. *Clin Transplant*. 2018;32:e13342
- 26
- 27 32. Koning MV, Teunissen AJW, van der Harst E, et al. Intrathecal Morphine for Laparoscopic
- 28 Segmental Colonic Resection as Part of an Enhanced Recovery Protocol: A Randomized
- 29 Controlled Trial. *Reg Anesth Pain Med*. 2018;43:166-173.
- 30
- 31 33. Helander EM, Webb MP, Bias M, et al. Use of Regional Anesthesia Techniques: Analysis of
- 32 Institutional Enhanced Recovery After Surgery Protocols for Colorectal Surgery. *J*
- 33 *Laparoendosc Adv Surg Tech A*. 2017 ;27:898-902.
- 34
- 35 34. Virlos I, Clements D, Beynon J, et al. Short-term outcomes with intrathecal versus epidural
- 36 analgesia in laparoscopic colorectal surgery. *Br J Surg*. 2010 ;97:1401-6.
- 37
- 38 35. Pitre L, Garbee D, Tipton J, et al. Effects of preoperative intrathecal morphine on
- 39 postoperative intravenous morphine dosage: a systematic review protocol. *JBI Database*
- 40 *System Rev Implement Rep*. 2018;16:867-870.
- 41
- 42 36. Belavy D, Janda M, Baker J, et al. Epidural analgesia is associated with an increased
- 43 incidence of postoperative complications in patients requiring an abdominal hysterectomy for
- 44 early stage endometrial cancer. *Gynecol Oncol* 2013;131:423–9.
- 45
- 46 37. Massicotte L, Chalaou KD, Beaulieu D, et al. Comparison of spinal anesthesia with general
- 47 anesthesia on morphine requirement after abdominal hysterectomy. *Acta Anaesthesiol Scand*
- 48 2009;53:641-647
- 49
- 50 38. Devlin NJ, Shah KK, Feng Y, et al. Valuing health-related quality of life: An EQ-5D-5L
- 51 value set for England. *Health Economics*. 2018; 27:7-22.
- 52
- 53
- 54
- 55
- 56
- 57
- 58
- 59
- 60

## FIGURE LEGENDS

- 1  
2  
3  
4 Figure 1. CONSORT flow chart of participants in the study. EDA, epidural analgesia. ITM,  
5 intrathecal morphine analgesia.  
6  
7 Figure 2. Illustration of EQ-5D weighted health state index in relation to occasion of  
8 measurement. Plots represent means and bars represent 95% confidence interval.  
9  
10 Result of the repeated measures ANOVA and post hoc tests from Day 0 - 42  
11 assessment is presented. EDA = epidural analgesia; ITM = intrathecal morphine  
12 analgesia. No significant differences were observed in the EQ-5D health index  
13 between the two groups preoperatively.  
14  
15  
16  
17  
18 Figure 3 and 4. Assessment of pain by means of a 10 graded numeric rating scale (NRS) at rest  
19 and at mobilization. Plots represent means and bars represent 95% confidence  
20 interval. Results of the repeated measures ANOVA and post hoc tests from Day 0  
21 to the Day 6 are shown in the table below the diagrams. Assessments done from  
22 the evening of surgery and three times daily. Day 1.1, 1.2 and 1.3, respectively,  
23 represent the measurements performed in the morning, the afternoon and the  
24 evening on Day 1. EDA = epidural analgesia; ITM = intrathecal morphine  
25 analgesia.  
26  
27  
28  
29  
30  
31  
32  
33 Figure 5 and 6. Consumption of analgesics after surgery in relation to occasion of measurement.  
34 Plots represent means and bars represent 95% confidence interval. Results of the  
35 repeated measures ANOVA and post hoc tests from Day 0 to the Day 6  
36 assessment for equivalent morphine given and from Day 3 to Day 42 for DDD  
37 non-opioids are presented in the table below the diagrams. DDD = defined daily  
38 dose; EDA = epidural analgesia; ITM = intrathecal morphine analgesia.  
39  
40  
41  
42  
43  
44  
45  
46  
47  
48  
49  
50  
51  
52  
53  
54  
55  
56  
57  
58  
59  
60

1  
2  
3  
4  
5  
6  
7  
8  
9  
10  
11  
12  
13  
14  
15  
16  
17  
18  
19  
20  
21  
22  
23  
24  
25  
26  
27  
28  
29  
30  
31  
32  
33  
34  
35  
36  
37  
38  
39  
40  
41  
42  
43  
44  
45  
46  
47  
48  
49  
50  
51  
52  
53  
54  
55  
56  
57  
58  
59  
60**AUTHOR STATEMENT****AUTHOR'S CONTRIBUTION**

PK, NBW and LN designed and conducted the study. PK performed the statistically analyses. PK, OB, NBW and LN undertook the initial interpretation of the data, which was followed by discussions with all the authors. PK, OB and LN drafted the initial version of the manuscript, followed by a critical revision process for intellectual content involving all authors. All authors agreed to the final version of the manuscript before submission. All authors agree to be accountable for the accuracy of any part of the work.

For peer review only

Table 1. Descriptive and demographic data of the study population.

|                                       | EDA group<br>n = 40 | ITM group<br>n = 40 |
|---------------------------------------|---------------------|---------------------|
| Age (years)                           | 59.0 (51.5-66.0)    | 58.5 (54.0-62.5)    |
| < 50 years                            | 7 (17.5%)           | 6 (15%)             |
| 50 – 60 years                         | 16 (40%)            | 20 (50%)            |
| > 60 years                            | 17 (42.5%)          | 14 (35%)            |
| Body mass index (kg/m <sup>2</sup> )  | 28.5 (24.7-31.2)    | 27.8 (23.4-31.2)    |
| BMI < 25 kg/m <sup>2</sup>            | 11 (27.5%)          | 13 (32.5%)          |
| BMI 25-29.9 kg/m <sup>2</sup>         | 15 (37.5%)          | 15 (37.5%)          |
| BMI 30-34.9 kg/m <sup>2</sup>         | 9 (22.5%)           | 7 (17.5%)           |
| BMI ≥ 35 kg/m <sup>2</sup>            | 5 (12.5%)           | 5 (12.5%)           |
| Parity                                | 2.0 (0-5)           | 2.0 (0-4)           |
| Smokers                               | 5 (12.5%)           | 4 (10%)             |
| Previous laparotomy                   | 17 (42.5%)          | 17 (42.5%)          |
| ASA classification                    |                     |                     |
| Class I                               | 15 (37.5%)          | 15 (37.5%)          |
| Class II                              | 25 (62.5%)          | 25 (62.5%)          |
| Comorbidity                           |                     |                     |
| Diabetes mellitus                     | 4 (10%)             | 4 (10%)             |
| Cardiovascular disease                | 13 (32.5%)          | 12 (30%)            |
| Pulmonary disease                     | 4 (10%)             | 5 (12.5%)           |
| Mild psychiatric disease              | 6 (12.5%)           | 4 (10%)             |
| Previous malignancy                   | 4 (10%)             | 2 (5%)              |
| Current medication                    |                     |                     |
| Antidepressant/sedative               | 8 (20%)             | 7 (17.5%)           |
| Analgesics                            | 7 (17.5%)           | 12 (30%)            |
| Indication for surgery                |                     |                     |
| Proven/assumed gynecologic malignancy | 16/24 (40%/60%)     | 18/22 (45%/55%)     |

Figures denote median and (inter quartile range) or number and (percent).

ASA, American Society of Anesthesiologists risk classification; BMI, body mass index. EDA, epidural analgesia. ITM, intrathecal morphine analgesia

Table 2. Clinical surgical and anesthesiological data.

|                                                                   | EDA group<br>n = 40 | ITM group<br>n = 40 |
|-------------------------------------------------------------------|---------------------|---------------------|
| Operation time (minutes)                                          | 116 (80-151.5)      | 139 (99.5-169)      |
| Estimated per-operative blood loss (ml)                           | 100 (50-275)        | 200 (50-250)        |
| Extent of skin incision from superior edge of symphysis pubis to: |                     |                     |
| - umbilicus                                                       | 6 (15%)             | 2 (5%)              |
| - between umbilicus and processus xiphoideus                      | 17 (42.5%)          | 21 (52.5%)          |
| - processus xiphoideus                                            | 17 (42.5%)          | 17 (42.5%)          |
| Extent of surgery (no. of women)                                  |                     |                     |
| - Category I                                                      | 1 (2.5%)            | 1 (2.5%)            |
| - Category II                                                     | 8 (20%)             | 2 (5%)              |
| - Category III                                                    | 17 (42.5%)          | 18 (45%)            |
| - Category IV                                                     | 8 (20%)             | 14 (35%)            |
| - Category V                                                      | 6 (15%)             | 5 (12.5%)           |
| Tumor status at end of surgery <sup>†</sup> (no. of women):       |                     |                     |
| - Macroscopically radical                                         | 17 (63%)            | 25 (76%)            |
| - Minimal disease                                                 | 3 (11%)             | 5 (15%)             |
| - Bulky disease                                                   | 7 (26%)             | 3 (9%)              |
| Histopathological diagnosis: malignant /benign                    | 27/13 (67.5/32.5%)  | 33/7 (82.5/17.5%)   |
| - Ovarian/fallopian tube/peritoneal cancer                        | 13 (32.5%)          | 18 (45%)            |
| - Ovarian borderline cancer                                       | 5 (12.5%)           | 0 (0%)              |
| - Uterus carcinoma or sarcoma                                     | 7 (17.5%)           | 13 (32.5%)          |
| - Cervical cancer                                                 | 1 (2.5%)            | 0 (0%)              |
| - Appendix or sigmoideum cancer                                   | 1 (2.5%)            | 2 (5%)              |
| - Benign ovarian or uterine tumor                                 | 13 (32.5%)          | 7 (17.5%)           |
| CAD at discharge (no. of women)                                   | 3 (7.7%)            | 4 (10.3%)           |
| Premedication                                                     |                     |                     |
| Paracetamol (DDD)                                                 | 0.67 (0.44-0.67)    | 0.67 (0.67-0.67)    |
| Morphine <sup>§</sup> (mg)                                        | 0 (0-0.75)          | 0 (0-0)             |
| Antiemetic, medication (no. of women)                             | 16 (57%)            | 12 (43%)            |
| Antiemetic, Acupressure band (no. of women)                       | 22 (47%)            | 25 (53%)            |
| Anesthetic drugs:                                                 |                     |                     |
| Propofol (mg)                                                     | 200 (160-240)       | 200 (160-260)       |
| Rocuronium bromid (mg)                                            | 50 (40-60)          | 50 (40-62.5)        |
| Equivalent morphine dose (mg)                                     | 30.5 (27.3-41.3)    | 45.0 (40.0-50.0)    |
| Paracetamol (mg)                                                  | 0 (0-0)             | 0 (0-0)             |
| Vasoactive treatment during anesthesia                            |                     |                     |
| Ephedrine (mg)                                                    | 20 (7.5-25)         | 20 (15-25)          |
| Phenylephrine (µg)                                                | 0 (0-1062)          | 0 (0-1440)          |
| Norepinephrine (µg)                                               | 0 (0-21)            | 0 (0-130)           |
| Atropine (mg)                                                     | 0 (0-0)             | 0 (0-0.5)           |
| Anesthesia time (minutes)                                         | 177.5 (142.5-202.5) | 200 (155-240)       |
| Lowest body temperature during surgery (°C)                       | 35.7 (35.5-36.1)    | 35.6 (35.4-35.9)    |
| Body temperature at end of surgery (°C)                           | 36.1 (35.9-36.4)    | 36.1 (35.7-36.3)    |
| Time in PACU (hours)                                              | 4.6 (4.2-5.6)       | 5.7 (4.0-8.1)       |

Figures denote number and (percent) or median and (inter quartile range).

CAD, transurethral or supra pubic indwelling catheter. DDD, defined daily dose. EDA, epidural analgesia. ITM, intrathecal morphine analgesia. PACU, post anesthesia care unit.

1  
2 Categories of extent of surgery: Category I, diagnostic surgery; Category II, resection of  
3 gynecologic organs only; Category III, resection of gynecologic organs, omentectomy and ±  
4 appendectomy; Category IV, as Category III + pelvic and/or paraaortic lymphadenectomy;  
5 Category V, as Category III ± pelvic and/or paraaortic lymphadenectomy + resection of abdominal  
6 visceral organs.  
7  
8  
9  
10  
11  
12  
13  
14  
15  
16  
17  
18  
19  
20  
21  
22  
23  
24  
25  
26  
27  
28  
29  
30  
31  
32  
33  
34  
35  
36  
37  
38  
39  
40  
41  
42  
43  
44  
45  
46  
47  
48  
49  
50  
51  
52  
53  
54  
55  
56  
57  
58  
59  
60

For peer review only



Table 3. SF-36 subscales and summary scores. A high score represents a better health-related quality of life

| SF-36 subscales                  | Time lapse  |             |            |              | EDA    | Day 42 - Baseline |           |             |
|----------------------------------|-------------|-------------|------------|--------------|--------|-------------------|-----------|-------------|
|                                  | Baseline    |             | Day 42     |              |        | EDA               | ITM       | EDA vs. ITM |
|                                  | EDA         | ITM         | EDA        | ITM          |        | p-value *         | p-value * | p-value **  |
| Physical functioning             | 85 (63-95)  | 80 (65-95)  | 80 (65-95) | 83 (68-90)   | 0.91   | 0.95              | 0.69      |             |
| Role physical                    | 38 (0-100)  | 63 (0-100)  | 0 (0-13)   | 0 (0-0)      | <0.001 | <0.0001           | 0.16      |             |
| Bodily pain                      | 51 (37-100) | 62 (47-84)  | 58 (42-74) | 74 (52-84)   | 0.96   | 0.92              | 0.95      |             |
| General health                   | 75 (57-85)  | 72 (55-81)  | 70 (47-87) | 72 (59-81)   | 0.10   | 0.65              | 0.10      |             |
| Vitality                         | 53 (40-75)  | 53 (43-70)  | 45 (33-68) | 55 (43-70)   | 0.08   | 0.90              | 0.20      |             |
| Social functioning               | 75 (50-100) | 75 (56-81)  | 75 (50-88) | 75 (50-75)   | 0.15   | 0.70              | 0.09      |             |
| Role emotional                   | 100 (0-100) | 100 (0-100) | 83 (0-100) | 100 (33-100) | 0.65   | 0.25              | 0.30      |             |
| Mental health                    | 76 (60-84)  | 70 (60-80)  | 78 (66-84) | 80 (66-86)   | 0.54   | <0.01             | 0.13      |             |
| Physical component summary score | 44 (34-53)  | 45 (34-53)  | 39 (34-44) | 38 (35-42)   | 0.03   | <0.01             | 0.41      |             |
| Mental component summary score   | 46 (35-52)  | 46 (35-51)  | 49 (34-53) | 51 (39-55)   | 0.69   | 0.01              | 0.05      |             |

Figures indicate median (inter quartile range). EDA = epidural analgesia. ITM = intrathecal morphine analgesia.

\* Wilcoxon matched pair tests. \*\* Mann-Whitney U test.

No significant differences were observed in the subscales between the two groups at baseline (Mann-Whitney U-test).

Table 4. The Clavien-Dindo classification of adverse events (contracted form) within the study period of six weeks.

|                  | EDA group<br>(n=40) | ITM group<br>(n=40) |
|------------------|---------------------|---------------------|
| No complications | 19 (47.5)           | 19 (47.5)           |
| Grade I          | 13 (32.5)           | 8 (20.0)            |
| Grade II         | 6 (15.0)            | 6 (15.0)            |
| Grade III        | 1 (2.5)             | 6 (15.0)            |
| Grade IV         | 1 (2.5)             | 1 (2.5)             |

Figures denote number and (percent).

EDA = epidural analgesia. ITM = intrathecal morphine analgesia.  $p=0.31$ ;  $\chi^2$  for trends (df=4).

Grade I: Any deviation from the normal postoperative course without the need for pharmacological treatment or surgical, endoscopic and radiological interventions. Allowed therapeutic regimens are: drugs as antiemetics, antipyretics, analgetics, diuretics and electrolytes and physiotherapy. This grade also includes wound infections opened at the bedside.

Grade II: Requiring pharmacological treatment with drugs other than such allowed for grade I complications. Blood transfusions and total parenteral nutrition are also included.

Grade III: Requiring surgical, endoscopic or radiological intervention

Grade IV: Life-threatening complication requiring intermediate care/intensive care unit management

1  
2  
3  
4  
5  
6  
7  
8  
9  
10  
11  
12  
13  
14  
15  
16  
17  
18  
19  
20  
21  
22  
23  
24  
25  
26  
27  
28  
29  
30  
31  
32  
33  
34  
35  
36  
37  
38  
39  
40  
41  
42  
43  
44  
45  
46  
47  
48  
49  
50  
51  
52  
53  
54  
55  
56  
57  
58  
59  
60

Insert Figure 2 here

| Repeated measures ANOVA    |                       |                    |
|----------------------------|-----------------------|--------------------|
| Main effect between groups | Main effect over time | Interaction effect |
| $p = 0.22$                 | $p < 0.0001$          | $p = 0.34$         |

Figure 2. Illustration of EQ-5D weighted health state index in relation to occasion of measurement. Plots represent means and bars represent 95% confidence interval. Result of the repeated measures ANOVA from Day 0 - 42 assessment is presented. EDA = epidural analgesia; ITM = intrathecal morphine analgesia. No significant differences were observed in the EQ-5D health index between the two groups preoperatively.

1  
2  
3  
4  
5  
6  
7  
8  
9  
10  
11  
12  
13  
14  
15  
16  
17  
18  
19  
20  
21  
22  
23  
24  
25  
26  
27  
28  
29  
30  
31  
32  
33  
34  
35  
36  
37  
38  
39  
40  
41  
42  
43  
44  
45  
46



|                     | Repeated measures ANOVA    |                       |                    |
|---------------------|----------------------------|-----------------------|--------------------|
|                     | Main effect between groups | Main effect over time | Interaction effect |
| NRS at rest         | $p = 0.34$                 | $p < 0.001$           | $p < 0.0001$       |
| NRS at mobilization | $p = 0.08$                 | $p < 0.0001$          | $p < 0.0001$       |

|                     | Bonferroni post hoc tests, (p-value) |         |         |         |         |         |         |         |         |         |         |         |         |         |         |         |         |         |         |      |
|---------------------|--------------------------------------|---------|---------|---------|---------|---------|---------|---------|---------|---------|---------|---------|---------|---------|---------|---------|---------|---------|---------|------|
|                     | Day 0.3                              | Day 1.1 | Day 1.2 | Day 1.3 | Day 2.1 | Day 2.2 | Day 2.3 | Day 3.1 | Day 3.2 | Day 3.3 | Day 4.1 | Day 4.2 | Day 4.3 | Day 5.1 | Day 5.2 | Day 5.3 | Day 6.1 | Day 6.2 | Day 6.3 |      |
| NRS at mobilization | 0.01                                 | 0.06    | 0.01    | 0.44    | 1.00    | 1.00    | 1.00    | 1.00    | 1.00    | 1.00    | 1.00    | 1.00    | 1.00    | 1.00    | 1.00    | 1.00    | 1.00    | 1.00    | 1.00    | 1.00 |

Figure 3 and 4. Assessment of pain by means of a 10 graded numeric rating scale (NRS) at rest and at mobilization. Plots represent means and bars represent 95% confidence interval. Results of the repeated measures ANOVA and post hoc tests from Day 0 to the Day 6 are shown in the table below the diagrams. Assessments done from the evening of surgery and three times daily. Day 1.1, 1.2 and 1.3, respectively, represent the measurements performed in the morning, the afternoon and the evening on Day 1. EDA = epidural analgesia; ITM = intrathecal morphine analgesia.

1  
2  
3  
4  
5  
6  
7  
8  
9  
10  
11  
12  
13  
14  
15  
16  
17  
18  
19  
20  
21  
22  
23  
24  
25  
26  
27  
28  
29  
30  
31  
32  
33  
34  
35  
36  
37  
38  
39  
40  
41  
42  
43  
44  
45  
46

Insert Figure 5 here

Insert Figure 6 here

|                                    | Repeated measures ANOVA              |         |                       |       |       |                    |       |
|------------------------------------|--------------------------------------|---------|-----------------------|-------|-------|--------------------|-------|
|                                    | Main effect between groups           |         | Main effect over time |       |       | Interaction effect |       |
| Opioids (Equivalent morphine (mg)) | $p < 0.001$                          |         | $p < 0.0001$          |       |       | $p < 0.0001$       |       |
| DDD non-opioids                    | $p = 0.06$                           |         | $p < 0.0001$          |       |       | $p = 0.08$         |       |
|                                    | Bonferroni post hoc tests, (p-value) |         |                       |       |       |                    |       |
|                                    | Day 0                                | Day 1   | Day 2                 | Day 3 | Day 4 | Day 5              | Day 6 |
| Opioids                            | <0.0001                              | <0.0001 | <0.001                | 1.00  | 1.00  | 1.00               | 1.00  |
| DDD non-opioids                    |                                      |         |                       | 1.00  | 1.00  | 0.93               | 0.10  |

Figure 5 and 6. Consumption of analgesics after surgery in relation to occasion of measurement. Plots represent means and bars represent 95% confidence interval. Results of the repeated measures ANOVA and post hoc tests from Day 0 to the Day 6 assessment for equivalent morphine given and for Day 3 to Day 42 for DDD non-opioids are presented in the table below the diagram. DDD = defined daily dose; EDA = epidural analgesia; ITM = intrathecal morphine analgesia.



Figure 1.

Figure 1

449x582mm (72 x 72 DPI)

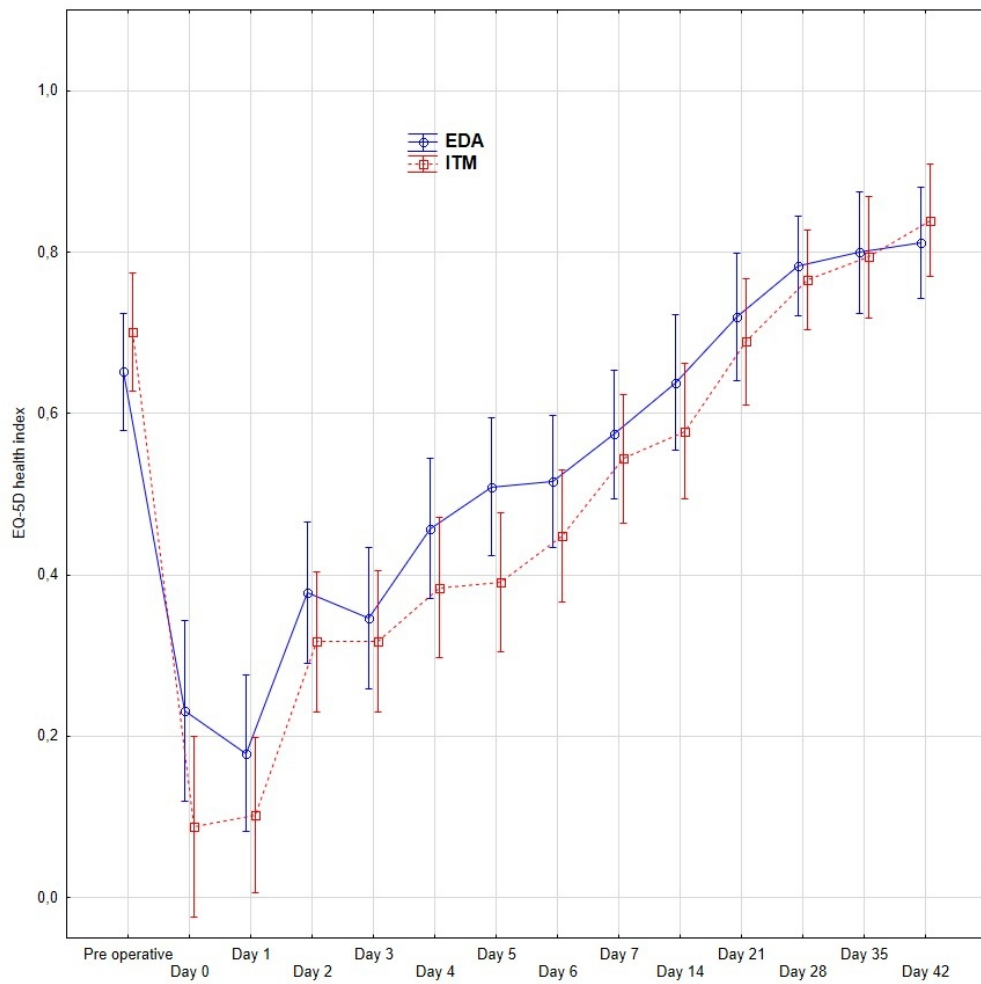

Figure 2

228x228mm (96 x 96 DPI)



Figure 3

228x228mm (96 x 96 DPI)



1  
2  
3  
4  
5  
6  
7  
8  
9  
10  
11  
12  
13  
14  
15  
16  
17  
18  
19  
20  
21  
22  
23  
24  
25  
26  
27  
28  
29  
30  
31  
32  
33  
34  
35  
36  
37  
38  
39  
40  
41  
42  
43  
44  
45  
46  
47  
48  
49  
50  
51  
52  
53  
54  
55  
56  
57  
58  
59  
60



Figure 4

228x228mm (96 x 96 DPI)



Figure 5

228x228mm (96 x 96 DPI)

1  
2  
3  
4  
5  
6  
7  
8  
9  
10  
11  
12  
13  
14  
15  
16  
17  
18  
19  
20  
21  
22  
23  
24  
25  
26  
27  
28  
29  
30  
31  
32  
33  
34  
35  
36  
37  
38  
39  
40  
41  
42  
43  
44  
45  
46  
47  
48  
49  
50  
51  
52  
53  
54  
55  
56  
57  
58  
59  
60



Figure 6

228x228mm (96 x 96 DPI)

# Reporting checklist for randomized trial.

Based on the CONSORT guidelines.

## Instructions to authors

Complete this checklist by entering the page numbers from your manuscript where readers will find each of the items listed below.

Your article may not currently address all the items on the checklist. Please modify your text to include the missing information. If you are certain that an item does not apply, please write "n/a" and provide a short explanation.

Upload your completed checklist as an extra file when you submit to a journal.

In your methods section, say that you used the CONSORT reporting guidelines, and cite them as:

Schulz KF, Altman DG, Moher D, for the CONSORT Group. CONSORT 2010 Statement: updated guidelines for reporting parallel group randomised trials

|                           |                     | Reporting Item                                                                                                    | Page Number |
|---------------------------|---------------------|-------------------------------------------------------------------------------------------------------------------|-------------|
| Title                     | <a href="#">#1a</a> | Identification as a randomized trial in the title.                                                                | 1           |
| Abstract                  | <a href="#">#1b</a> | Structured summary of trial design, methods, results, and conclusions                                             | 2           |
| Background and objectives | <a href="#">#2a</a> | Scientific background and explanation of rationale                                                                | 4           |
|                           | <a href="#">#2b</a> | Specific objectives or hypothesis                                                                                 | 4           |
| Trial design              | <a href="#">#3a</a> | Description of trial design (such as parallel, factorial) including allocation ratio.                             | 5           |
|                           | <a href="#">#3b</a> | Important changes to methods after trial commencement (such as eligibility criteria), with reasons                | Na          |
| Participants              | <a href="#">#4a</a> | Eligibility criteria for participants                                                                             | 5           |
|                           | <a href="#">#4b</a> | Settings and locations where the data were collected                                                              | 5           |
| Interventions             | <a href="#">#5</a>  | The experimental and control interventions for each group with sufficient details to allow replication, including | 5-6         |

|    |                        |                                                                                  |          |
|----|------------------------|----------------------------------------------------------------------------------|----------|
|    |                        | how and when they were actually administered                                     |          |
| 1  |                        |                                                                                  |          |
| 2  | Outcomes               | <a href="#">#6a</a> Completely defined prespecified primary and secondary        | 4-6      |
| 3  |                        | outcome measures, including how and when they were                               |          |
| 4  |                        | assessed                                                                         |          |
| 5  |                        |                                                                                  |          |
| 6  |                        |                                                                                  |          |
| 7  | Sample size            | <a href="#">#7a</a> How sample size was determined.                              | 7        |
| 8  |                        |                                                                                  |          |
| 9  |                        |                                                                                  |          |
| 10 |                        | <a href="#">#7b</a> When applicable, explanation of any interim analyses         | NA       |
| 11 |                        | and stopping guidelines                                                          |          |
| 12 |                        |                                                                                  |          |
| 13 | Randomization -        | <a href="#">#8a</a> Method used to generate the random allocation                | 5        |
| 14 | Sequence generation    | sequence.                                                                        |          |
| 15 |                        |                                                                                  |          |
| 16 |                        | <a href="#">#8b</a> Type of randomization; details of any restriction (such as   | 5        |
| 17 |                        | blocking and block size)                                                         |          |
| 18 |                        |                                                                                  |          |
| 19 | Randomization -        | <a href="#">#9</a> Mechanism used to implement the random allocation             | 5        |
| 20 | Allocation concealment | sequence (such as sequentially numbered containers),                             |          |
| 21 | mechanism              | describing any steps taken to conceal the sequence until                         |          |
| 22 |                        | interventions were assigned                                                      |          |
| 23 |                        |                                                                                  |          |
| 24 | Randomization -        | <a href="#">#10</a> Who generated the allocation sequence, who enrolled          | 5        |
| 25 | Implementation         | participants, and who assigned participants to                                   |          |
| 26 |                        | interventions                                                                    |          |
| 27 |                        |                                                                                  |          |
| 28 | Blinding               | <a href="#">#11a</a> If done, who was blinded after assignment to                | NA       |
| 29 |                        | interventions (for example, participants, care providers,                        |          |
| 30 |                        | those assessing outcomes) and how.                                               |          |
| 31 |                        |                                                                                  |          |
| 32 |                        | <a href="#">#11b</a> If relevant, description of the similarity of interventions | NA       |
| 33 |                        |                                                                                  |          |
| 34 | Statistical methods    | <a href="#">#12a</a> Statistical methods used to compare groups for primary      | 9        |
| 35 |                        | and secondary outcomes                                                           |          |
| 36 |                        |                                                                                  |          |
| 37 |                        | <a href="#">#12b</a> Methods for additional analyses, such as subgroup           | 9        |
| 38 |                        | analyses and adjusted analyses                                                   |          |
| 39 |                        |                                                                                  |          |
| 40 | Participant flow       | <a href="#">#13a</a> A diagram is strongly recommended. For each group,          | Figure 1 |
| 41 | diagram (strongly      | the numbers of participants who were randomly                                    |          |
| 42 | recommended)           | assigned, received intended treatment, and were                                  |          |
| 43 |                        | analysed for the primary outcome                                                 |          |
| 44 |                        |                                                                                  |          |
| 45 | Participant flow       | <a href="#">#13b</a> For each group, losses and exclusions after                 | Figure 1 |
| 46 |                        | randomization, together with reason                                              |          |
| 47 |                        |                                                                                  |          |
| 48 |                        |                                                                                  |          |
| 49 |                        |                                                                                  |          |
| 50 |                        |                                                                                  |          |
| 51 |                        |                                                                                  |          |
| 52 |                        |                                                                                  |          |
| 53 |                        |                                                                                  |          |
| 54 |                        |                                                                                  |          |
| 55 |                        |                                                                                  |          |
| 56 |                        |                                                                                  |          |
| 57 |                        |                                                                                  |          |
| 58 |                        |                                                                                  |          |
| 59 |                        |                                                                                  |          |
| 60 |                        |                                                                                  |          |

|    |                         |                      |                                                                                                                                                   |                 |
|----|-------------------------|----------------------|---------------------------------------------------------------------------------------------------------------------------------------------------|-----------------|
| 1  | Recruitment             | <a href="#">#14a</a> | Dates defining the periods of recruitment and follow-up                                                                                           | 5               |
| 2  |                         |                      |                                                                                                                                                   |                 |
| 3  |                         | <a href="#">#14b</a> | Why the trial ended or was stopped                                                                                                                | NA              |
| 4  |                         |                      |                                                                                                                                                   |                 |
| 5  | Baseline data           | <a href="#">#15</a>  | A table showing baseline demographic and clinical characteristics for each group                                                                  | Table 1         |
| 6  |                         |                      |                                                                                                                                                   |                 |
| 7  |                         |                      |                                                                                                                                                   |                 |
| 8  |                         |                      |                                                                                                                                                   |                 |
| 9  | Numbers analysed        | <a href="#">#16</a>  | For each group, number of participants (denominator) included in each analysis and whether the analysis was by original assigned groups           | Tables 1,2,4    |
| 10 |                         |                      |                                                                                                                                                   |                 |
| 11 |                         |                      |                                                                                                                                                   |                 |
| 12 |                         |                      |                                                                                                                                                   |                 |
| 13 |                         |                      |                                                                                                                                                   |                 |
| 14 | Outcomes and estimation | <a href="#">#17a</a> | For each primary and secondary outcome, results for each group, and the estimated effect size and its precision (such as 95% confidence interval) | 8, Figures 2-4  |
| 15 |                         |                      |                                                                                                                                                   |                 |
| 16 |                         | <a href="#">#17b</a> | For binary outcomes, presentation of both absolute and relative effect sizes is recommended                                                       | NA              |
| 17 |                         |                      |                                                                                                                                                   |                 |
| 18 |                         |                      |                                                                                                                                                   |                 |
| 19 |                         |                      |                                                                                                                                                   |                 |
| 20 | Ancillary analyses      | <a href="#">#18</a>  | Results of any other analyses performed, including subgroup analyses and adjusted analyses, distinguishing pre-specified from exploratory         | NA              |
| 21 |                         |                      |                                                                                                                                                   |                 |
| 22 |                         |                      |                                                                                                                                                   |                 |
| 23 |                         |                      |                                                                                                                                                   |                 |
| 24 |                         |                      |                                                                                                                                                   |                 |
| 25 |                         |                      |                                                                                                                                                   |                 |
| 26 |                         |                      |                                                                                                                                                   |                 |
| 27 |                         |                      |                                                                                                                                                   |                 |
| 28 |                         |                      |                                                                                                                                                   |                 |
| 29 | Harms                   | <a href="#">#19</a>  | All important harms or unintended effects in each group (For specific guidance see CONSORT for harms)                                             | 10, Table 4     |
| 30 |                         |                      |                                                                                                                                                   |                 |
| 31 |                         |                      |                                                                                                                                                   |                 |
| 32 |                         |                      |                                                                                                                                                   |                 |
| 33 | Limitations             | <a href="#">#20</a>  | Trial limitations, addressing sources of potential bias, imprecision, and, if relevant, multiplicity of analyses                                  | 11-12           |
| 34 |                         |                      |                                                                                                                                                   |                 |
| 35 |                         |                      |                                                                                                                                                   |                 |
| 36 |                         |                      |                                                                                                                                                   |                 |
| 37 | Interpretation          | <a href="#">#22</a>  | Interpretation consistent with results, balancing benefits and harms, and considering other relevant evidence                                     | 11-12           |
| 38 |                         |                      |                                                                                                                                                   |                 |
| 39 |                         |                      |                                                                                                                                                   |                 |
| 40 |                         |                      |                                                                                                                                                   |                 |
| 41 | Registration            | <a href="#">#23</a>  | Registration number and name of trial registry                                                                                                    | 2               |
| 42 |                         |                      |                                                                                                                                                   |                 |
| 43 | Protocol                | <a href="#">#24</a>  | Where the full trial protocol can be accessed, if available                                                                                       | Se Cover letter |
| 44 |                         |                      |                                                                                                                                                   |                 |
| 45 |                         |                      |                                                                                                                                                   |                 |
| 46 |                         |                      |                                                                                                                                                   |                 |
| 47 | Funding                 | <a href="#">#25</a>  | Sources of funding and other support (such as supply of drugs), role of funders                                                                   | 3               |
| 48 |                         |                      |                                                                                                                                                   |                 |
| 49 |                         |                      |                                                                                                                                                   |                 |

51 The CONSORT checklist is distributed under the terms of the Creative Commons Attribution License  
 52 CC-BY. This checklist can be completed online using <https://www.goodreports.org/>, a tool made by  
 53 the [EQUATOR Network](#) in collaboration with [Penelope.ai](#)  
 54
